# Supplementary material for: Physico-chemical properties of 4-(methylnitrosamino)-1-(3-pyridyl)-1-butanone (NNK) diazonium ion: a theoretical investigation
Source: Royal Society of Chemistry journal article supplement (doi:10.1039/d1ra04343a), 2021-01-01
Supplement: d1ra04343a1.pdf [file d1ra04343a1.pdf]

# Physico-Chemical Properties of 4-(methylnitrosamino)-1-(3-pyridyl)-1-butanone (NNK) Diazonium Ion: A Theoretical Investigation: Supporting Information<sup>†</sup>

Christos Deligkaris,<sup>\*a‡</sup> Evan Millam,<sup>b‡</sup> Edmir Wade,<sup>b‡</sup> Maverick L. Grayer,<sup>\*</sup> David M. Wahl<sup>\*</sup>

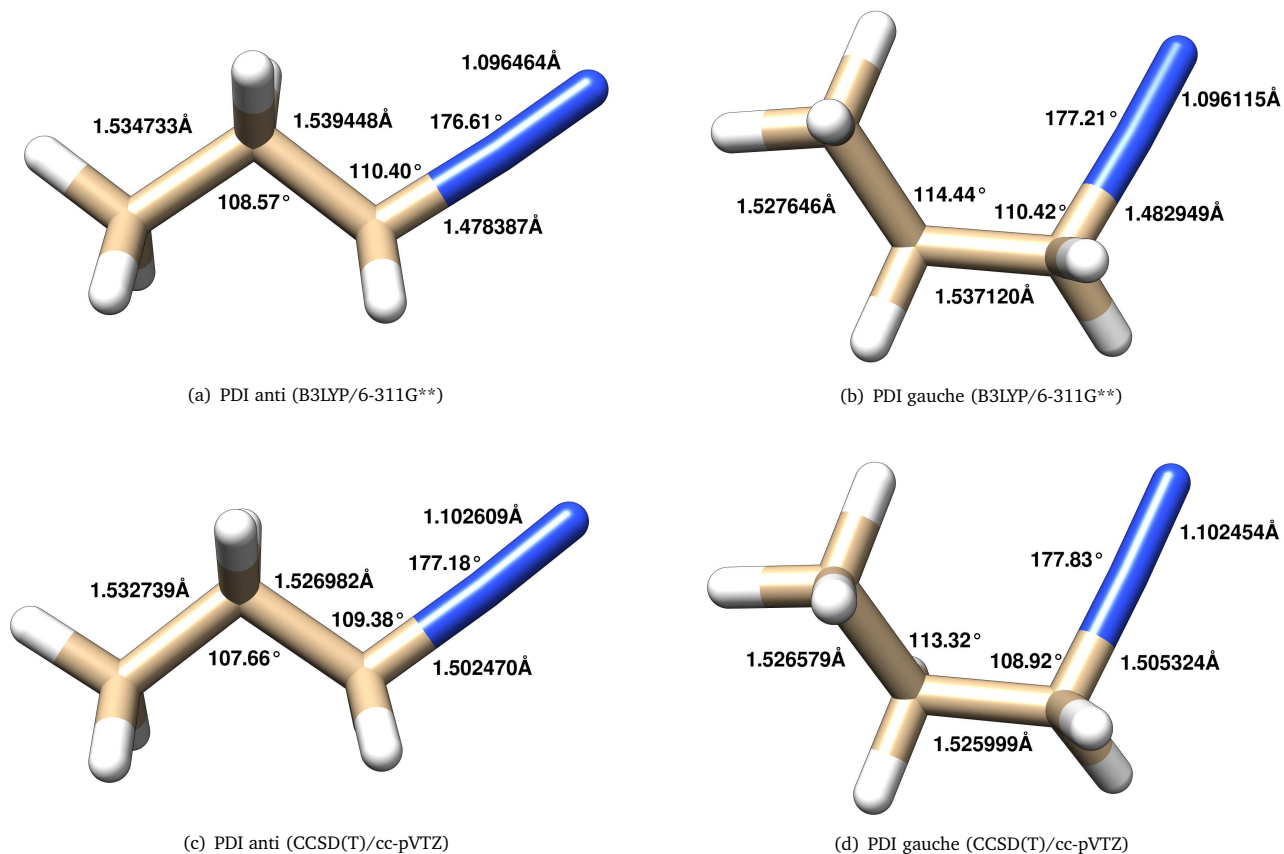

**Fig. 1** Energy minima at the CCSD(T)/cc-pVTZ level of theory (top) and B3LYP/6-311G<sup>\*\*</sup> (bottom).

<sup>a</sup> Department of Geology and Physics, University of Southern Indiana, 8600 University Blvd, Evansville, USA. Tel: (812) 228-5056; E-mail: Dr.Deligkaris@usi.edu

<sup>b</sup> Department of Chemistry, University of Southern Indiana, 8600 University Blvd, Evansville, USA.

<sup>†</sup> Electronic Supplementary Information (ESI) available: [details of any supplementary information available should be included here]. See DOI: 00.0000/00000000.

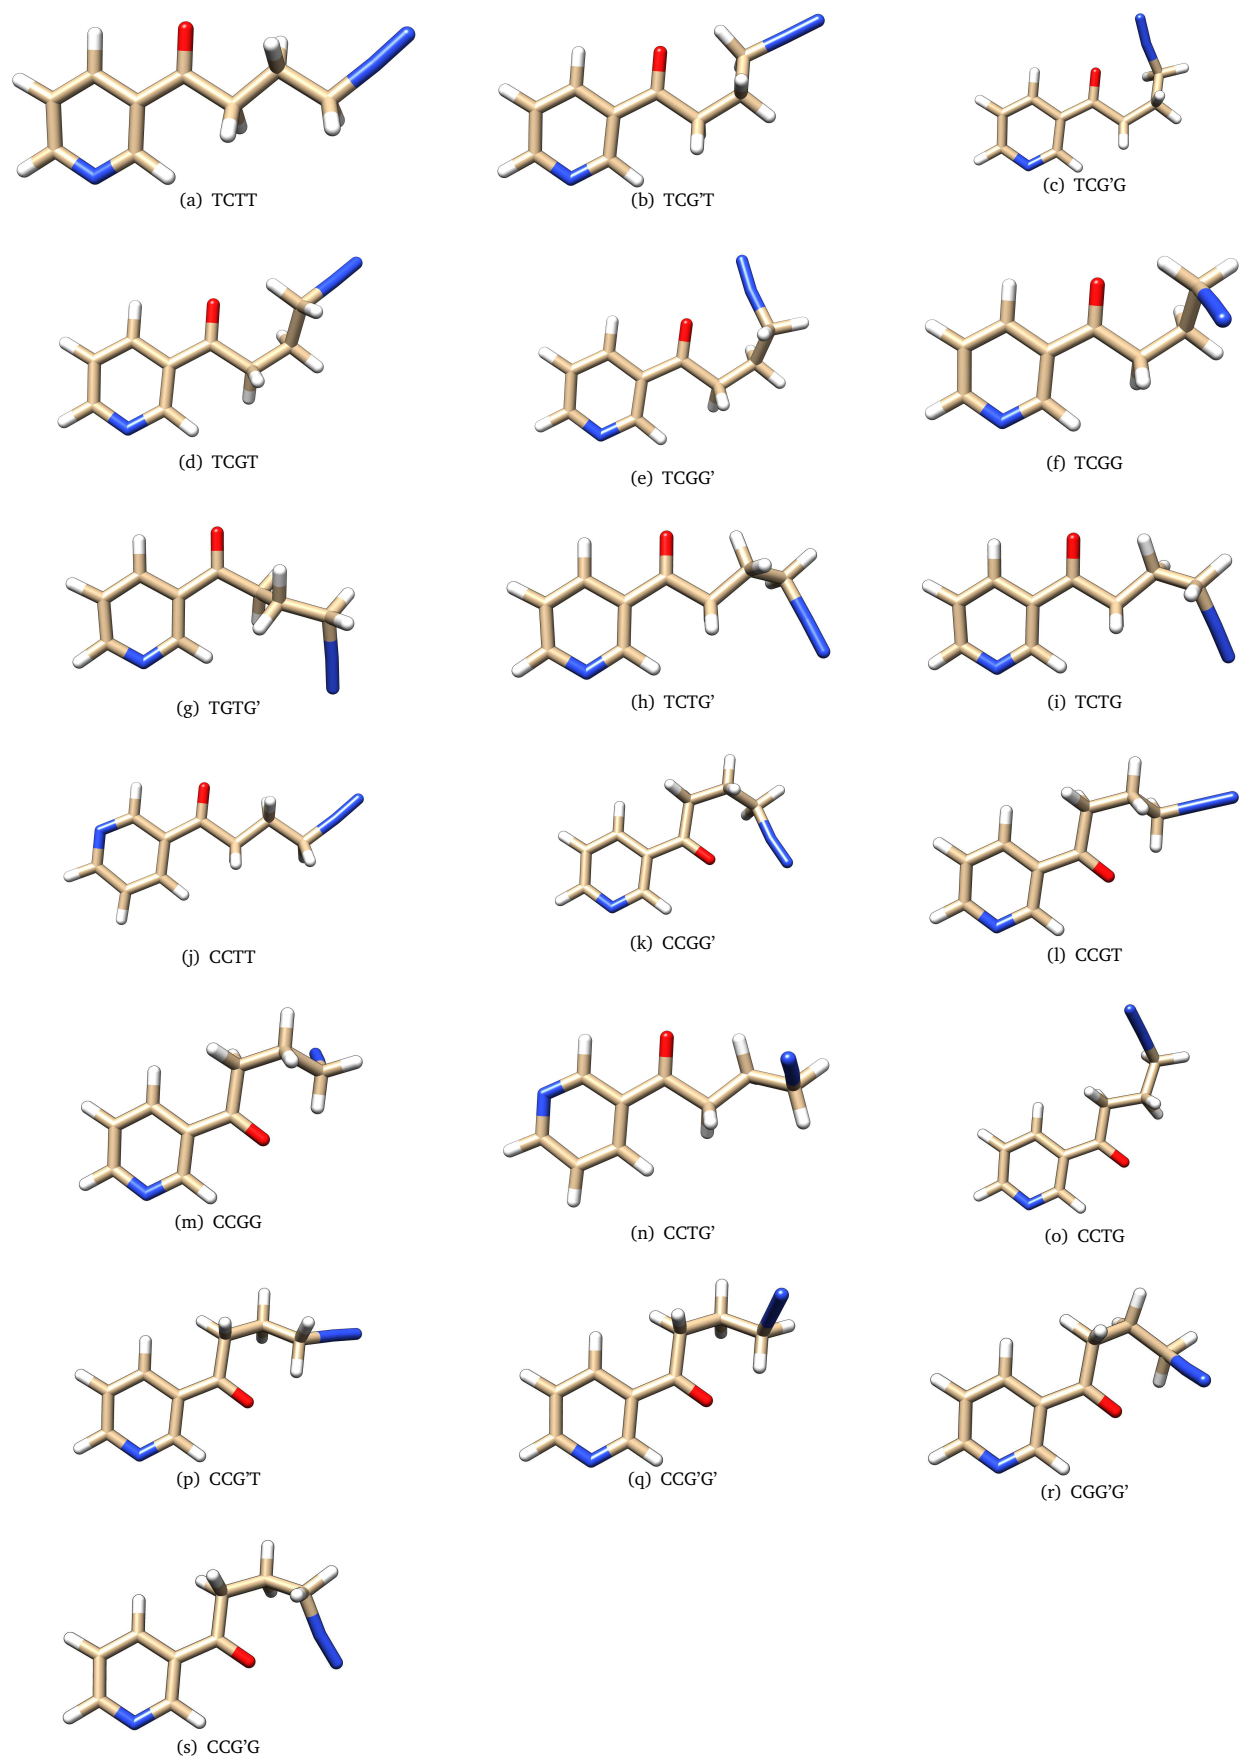

**Fig. 2** NNKDI conformations that correspond to energy minima at B3LYP/6-311G\*\* level of theory.

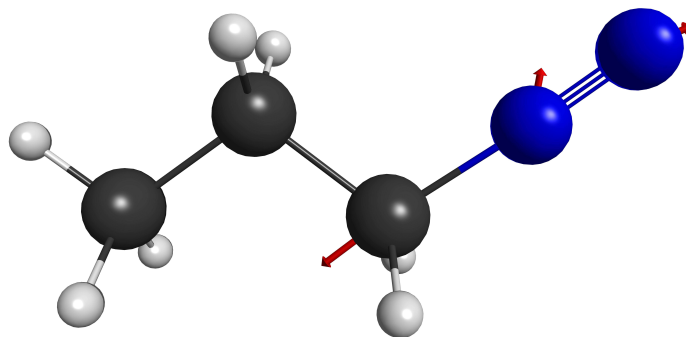

(a) CCSD(T)/cc-pVTZ, 669  $\text{cm}^{-1}$

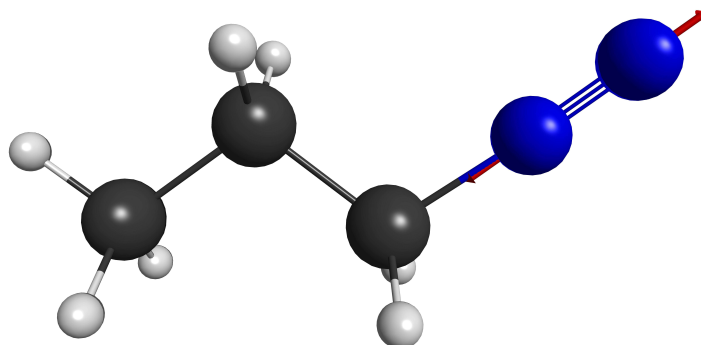

(b) CCSD(T)/cc-pVTZ, 2367  $\text{cm}^{-1}$

**Fig. 3** Selected PDI anti vibrational modes predicted at the CCSD(T)/cc-pVTZ level of theory.

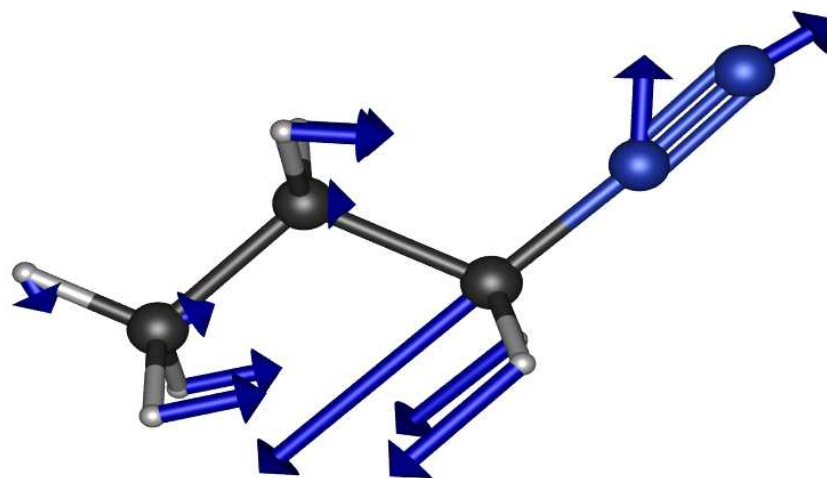

(a) B3LYP/6-311G\*\*, 669  $\text{cm}^{-1}$

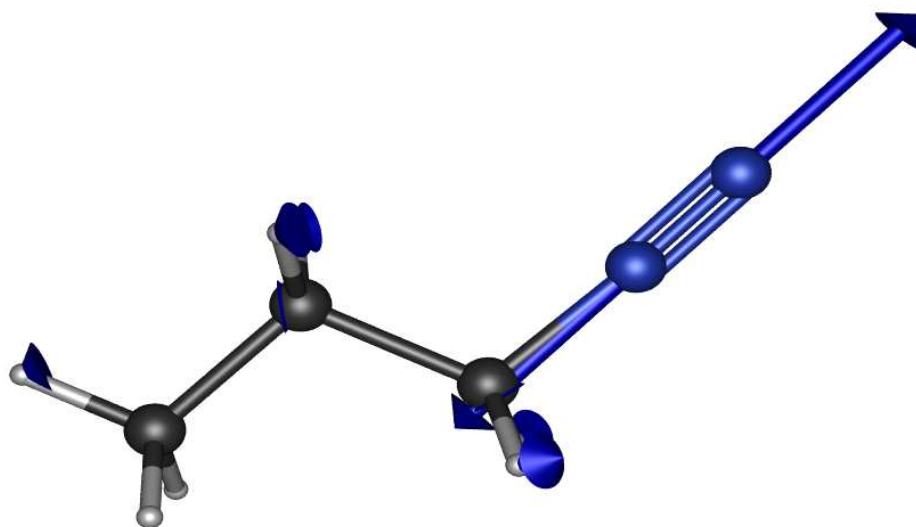

(b) B3LYP/6-311G\*\*, 2435  $\text{cm}^{-1}$

**Fig. 4** Selected PDI anti vibrational modes predicted at the B3LYP/6-311G\*\* levels of theory.



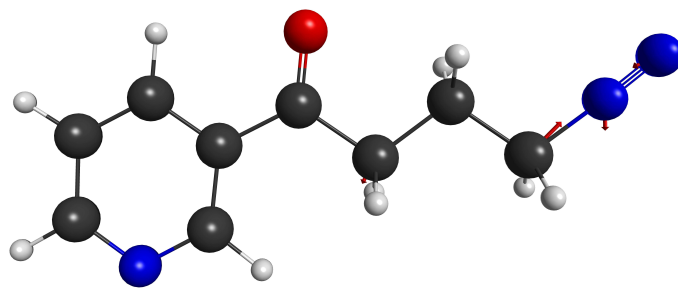

(a) 664.39  $\text{cm}^{-1}$ , CCSD/6-31G\*

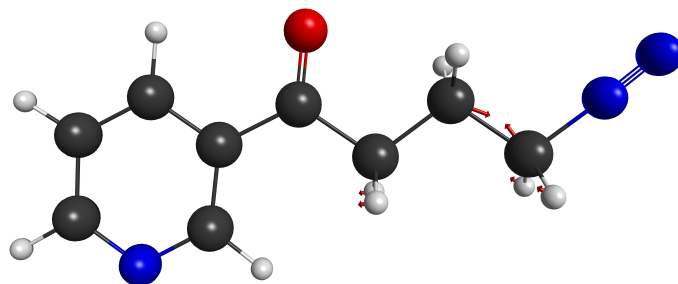

(b) 1060.24  $\text{cm}^{-1}$ , CCSD/6-31G\*

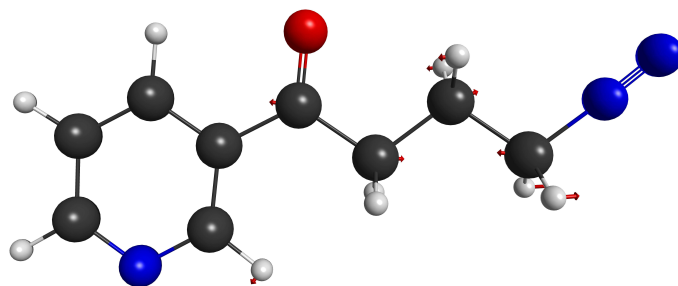

(c) 1389.14  $\text{cm}^{-1}$ , CCSD/6-31G\*

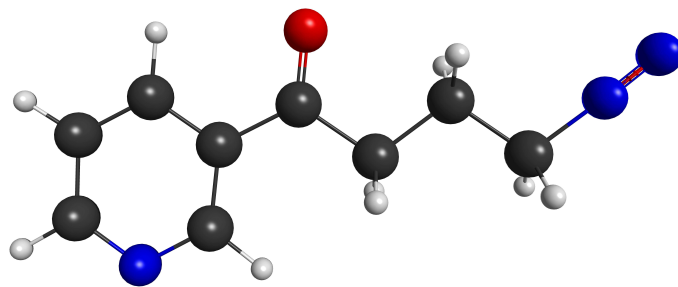

(d) 2443.48  $\text{cm}^{-1}$ , CCSD/6-31G\*

**Fig. 5** Selected NNKDI TCTT vibrational modes predicted at the CCSD/6-31G\* level of theory.

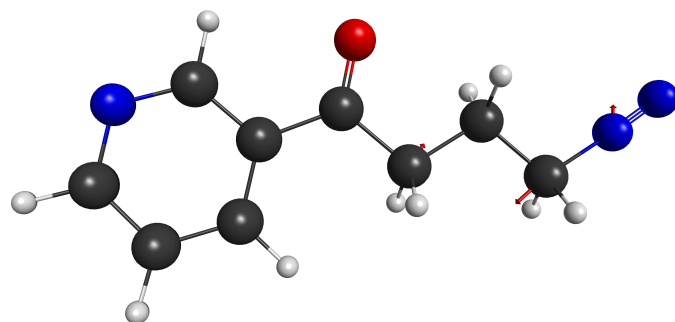

(a) 663.72  $\text{cm}^{-1}$ , CCSD/6-31G\*

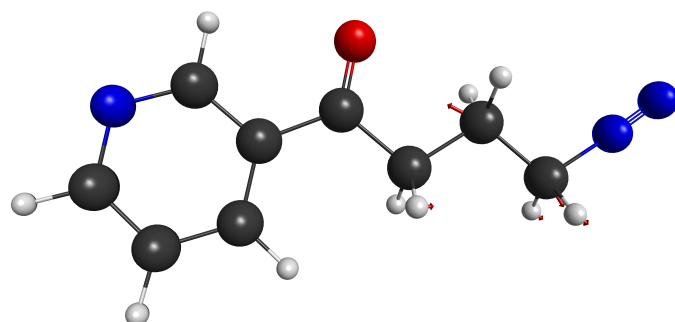

(b) 1060.39  $\text{cm}^{-1}$ , CCSD/6-31G\*

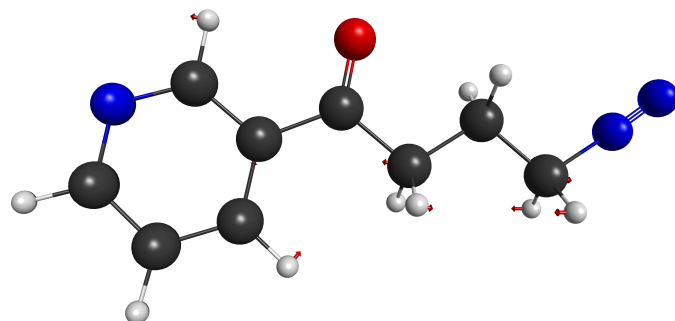

(c) 1385.24  $\text{cm}^{-1}$ , CCSD/6-31G\*

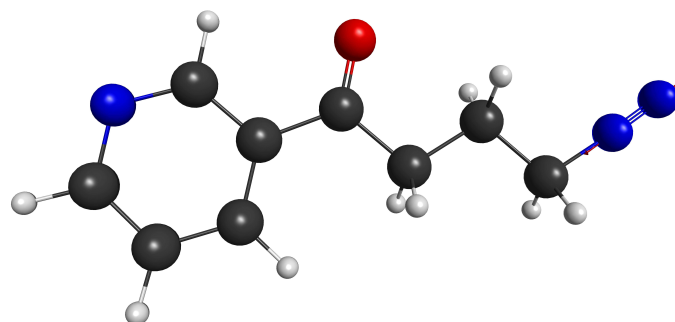

(d) 2443.21  $\text{cm}^{-1}$ , CCSD/6-31G\*

**Fig. 6** Selected NNKDI CCTT vibrational modes predicted at the CCSD/6-31G\* level of theory.

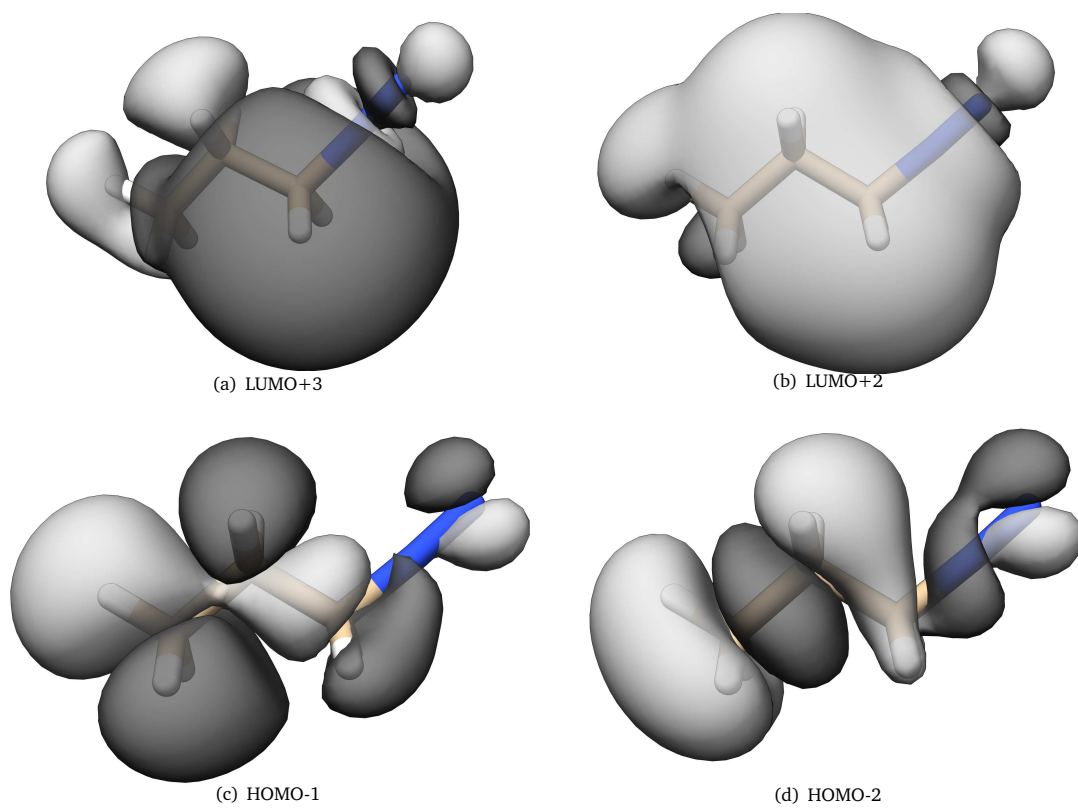

**Fig. 7** PDI anti molecular orbitals as calculated at the B3LYP/6-311G\*\* level of theory.

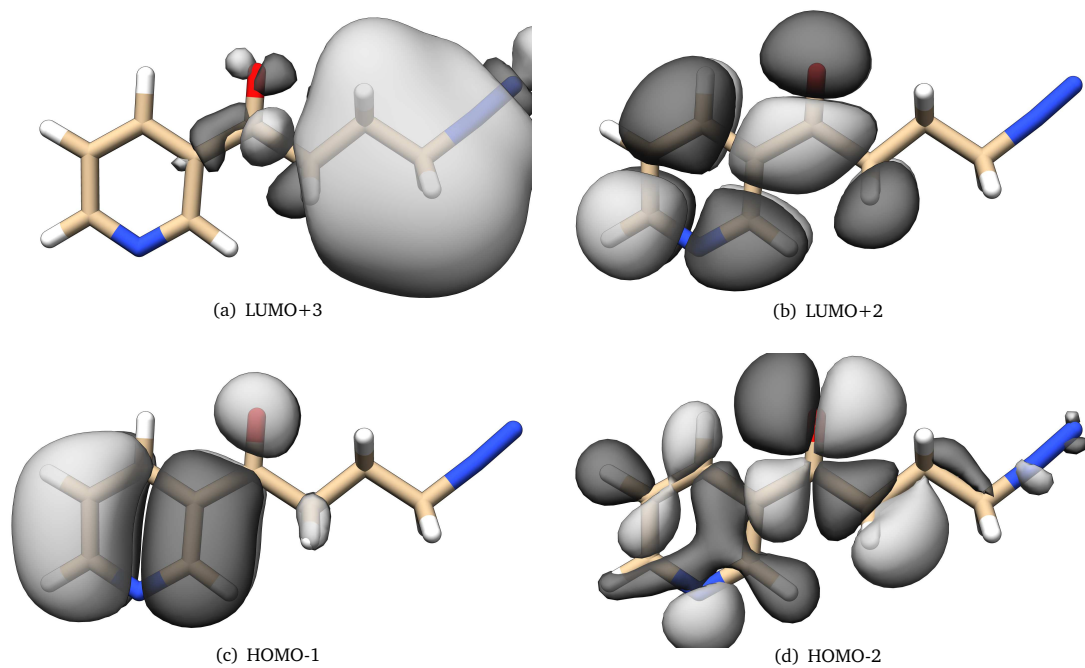

**Fig. 8** NNKDI molecular orbitals as calculated at the B3LYP/6-311G\*\* level of theory.

**Table 1** Energies for B3LYP/6-311G\*\* calculations of NNKDI conformation TCTT.

| Calculation         | Energy [Hartree]  |
|---------------------|-------------------|
| Restricted Singlet  | -588.289936119991 |
| Unrestricted Sinlet | -588.289936356757 |
| Restricted Triplet  | -588.173957026897 |

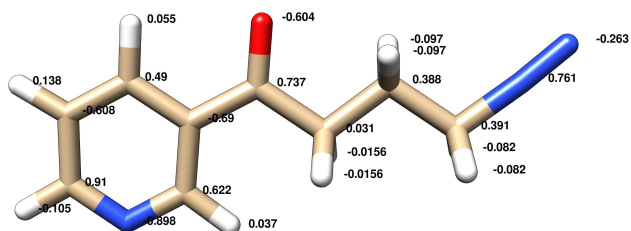

**Fig. 9** RESP charges of the NNKDI conformation TCTT as calculated at the HF/6-31G\* level of theory.

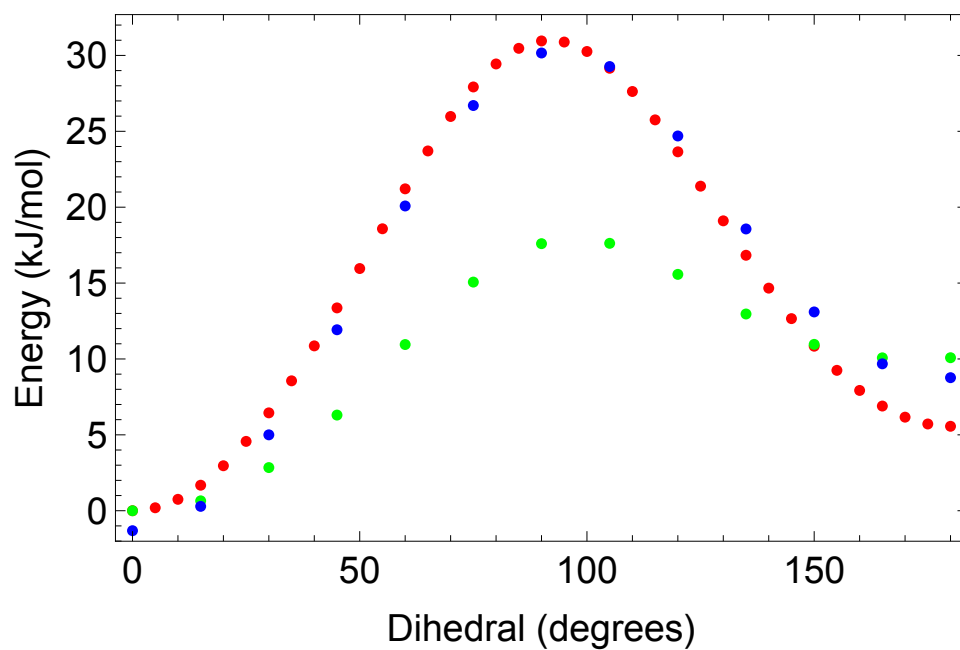

Fig. 10 Potential energy surface for the C1-C3' torsion. Red is QM, green is GAFF2, blue is this work.

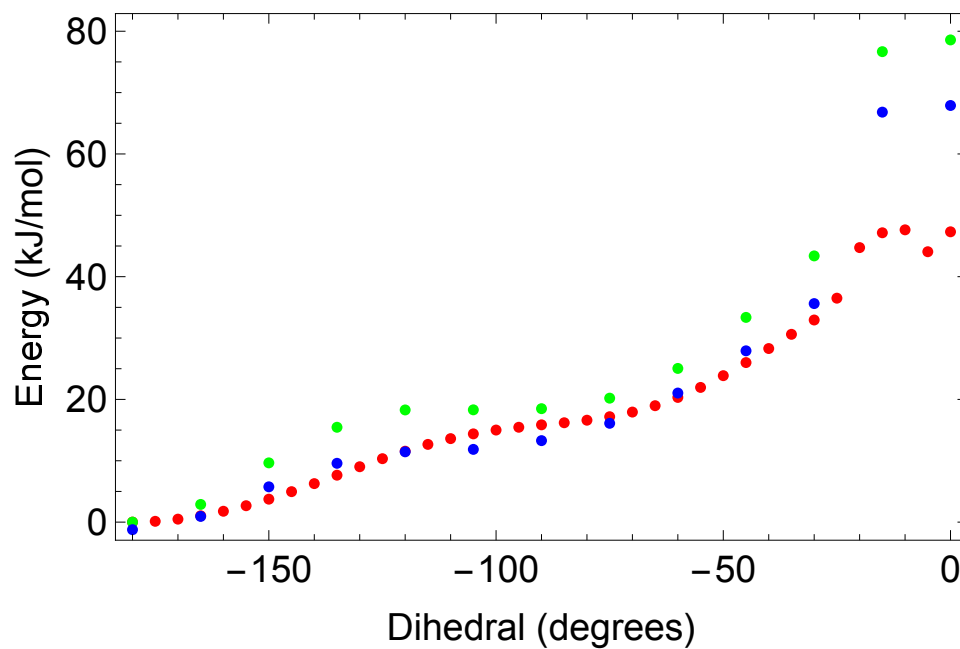

Fig. 11 Potential energy surface for the C2-C1 torsion. Red is QM, green is GAFF2, blue is this work.

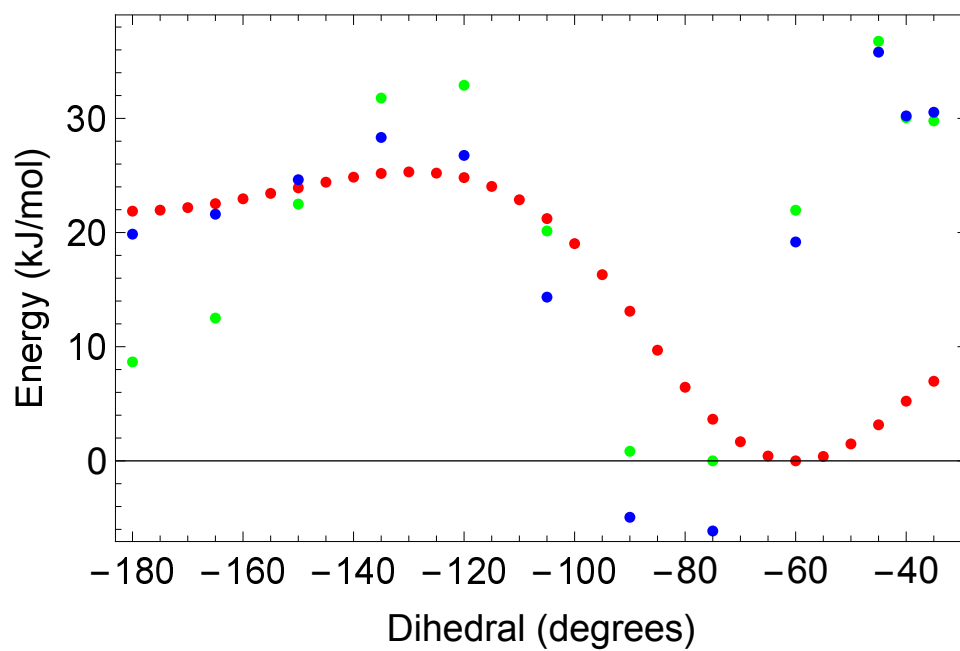

Fig. 12 Potential energy surface for the C3-C2 torsion. Red is QM, green is GAFF2, blue is this work.

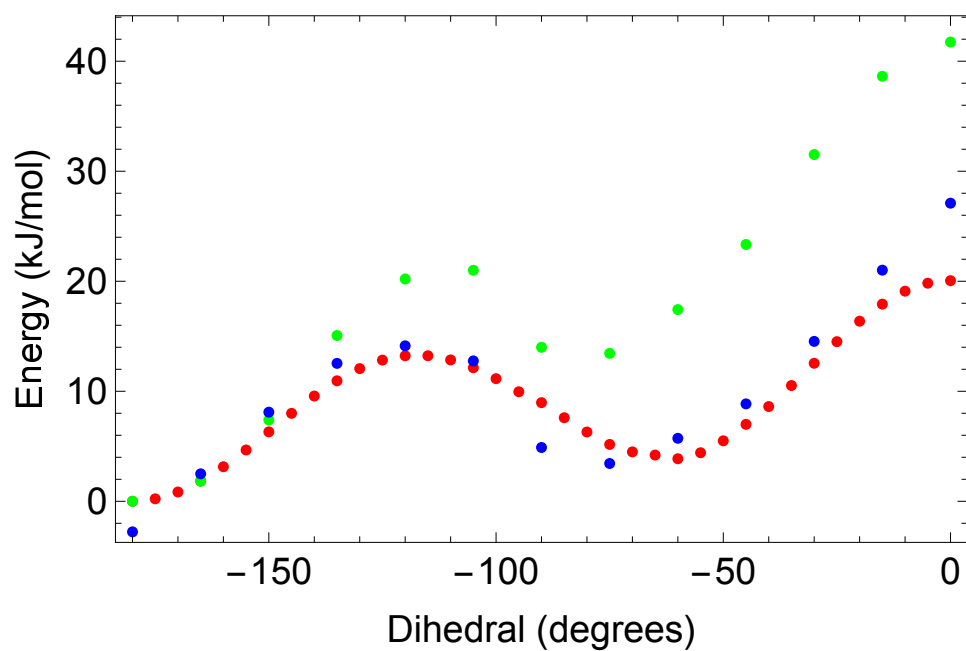

Fig. 13 Potential energy surface for the C4-C3 torsion. Red is QM, green is GAFF2, blue is this work.

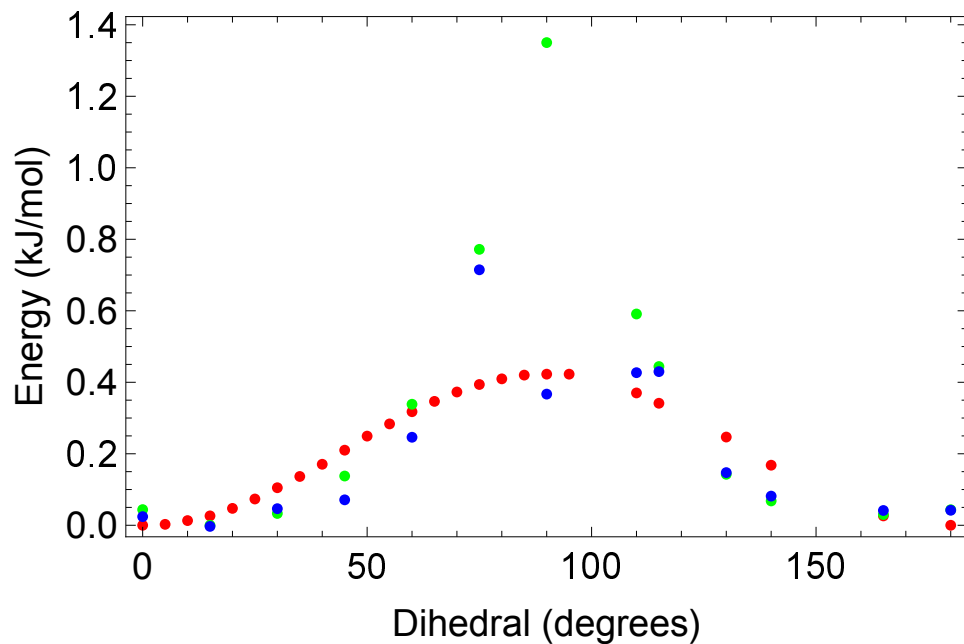

Fig. 14 Potential energy surface for the N5-C4 torsion. Red is QM, green is GAFF2, blue is this work.

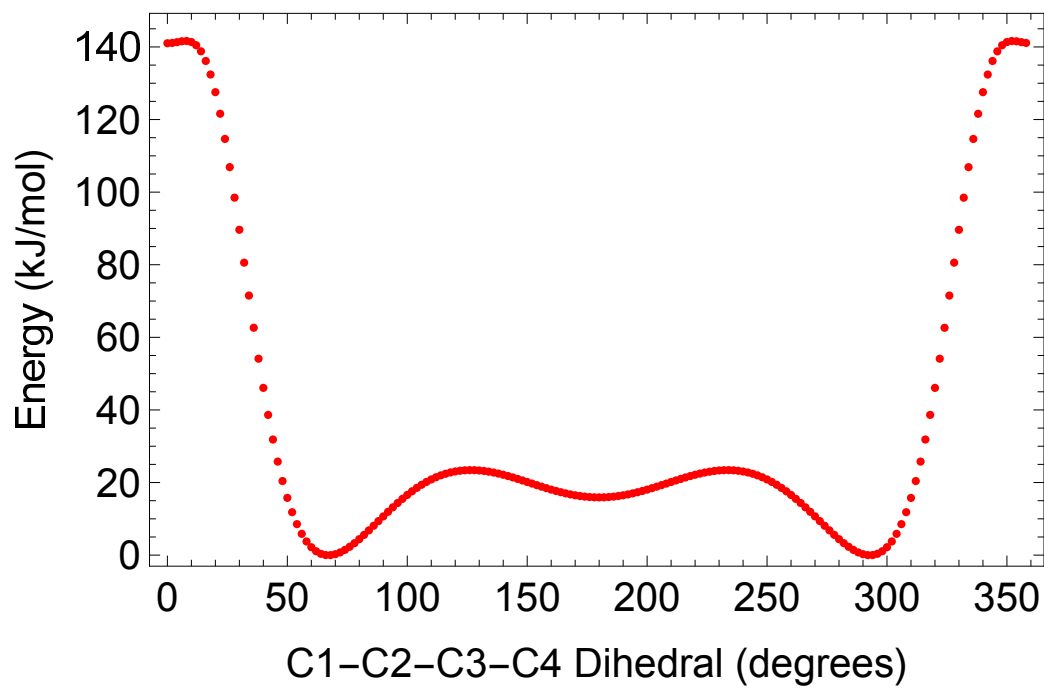

Fig. 15 Single point energies (no structural relaxation was allowed) at the MP2/6-311G\*\* level of theory around the C2-C3 torsion.



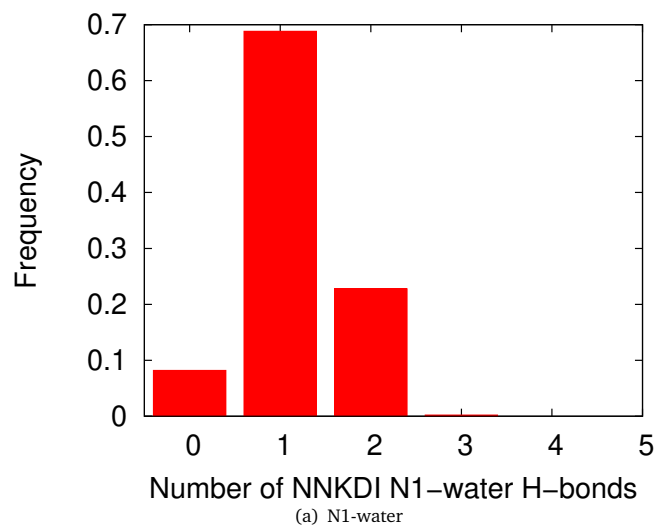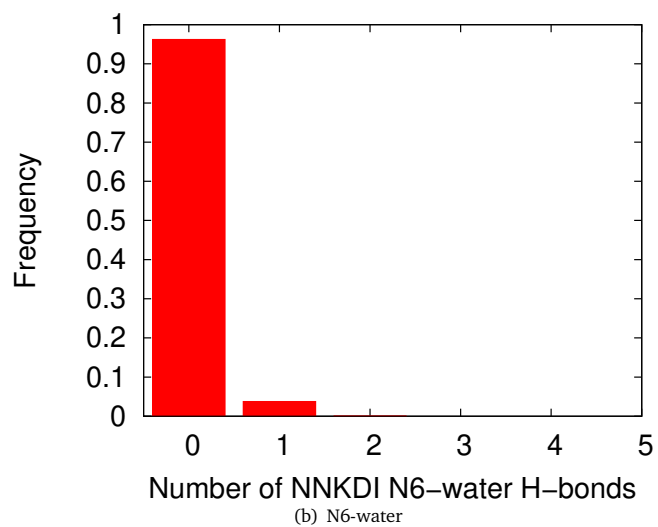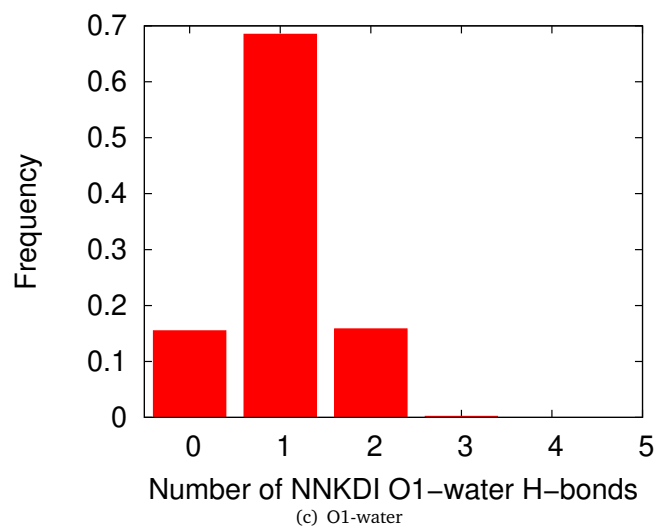

Fig. 16 Frequency distribution of NNKDI hydrogen bonds with water during a 1.5  $\mu$ s MD simulation.

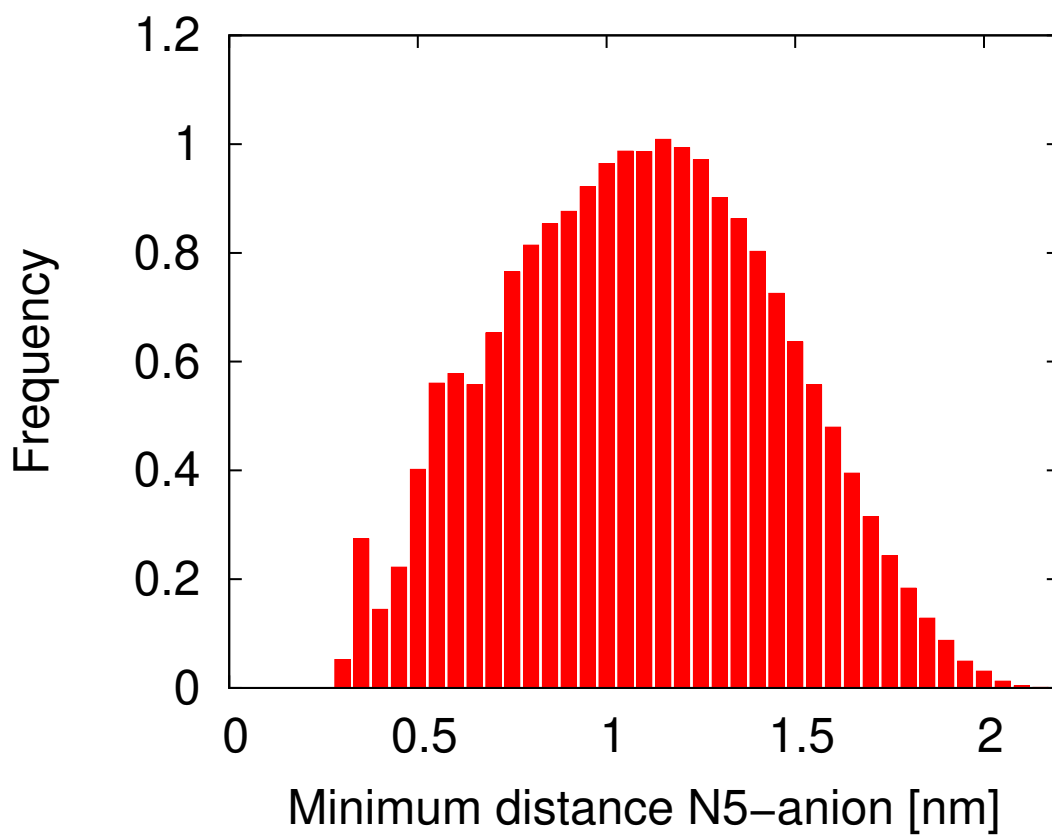

Fig. 17 Minimum distance between NNKDI atom N5 and all anions during a 1.5  $\mu$ s MD simulation.

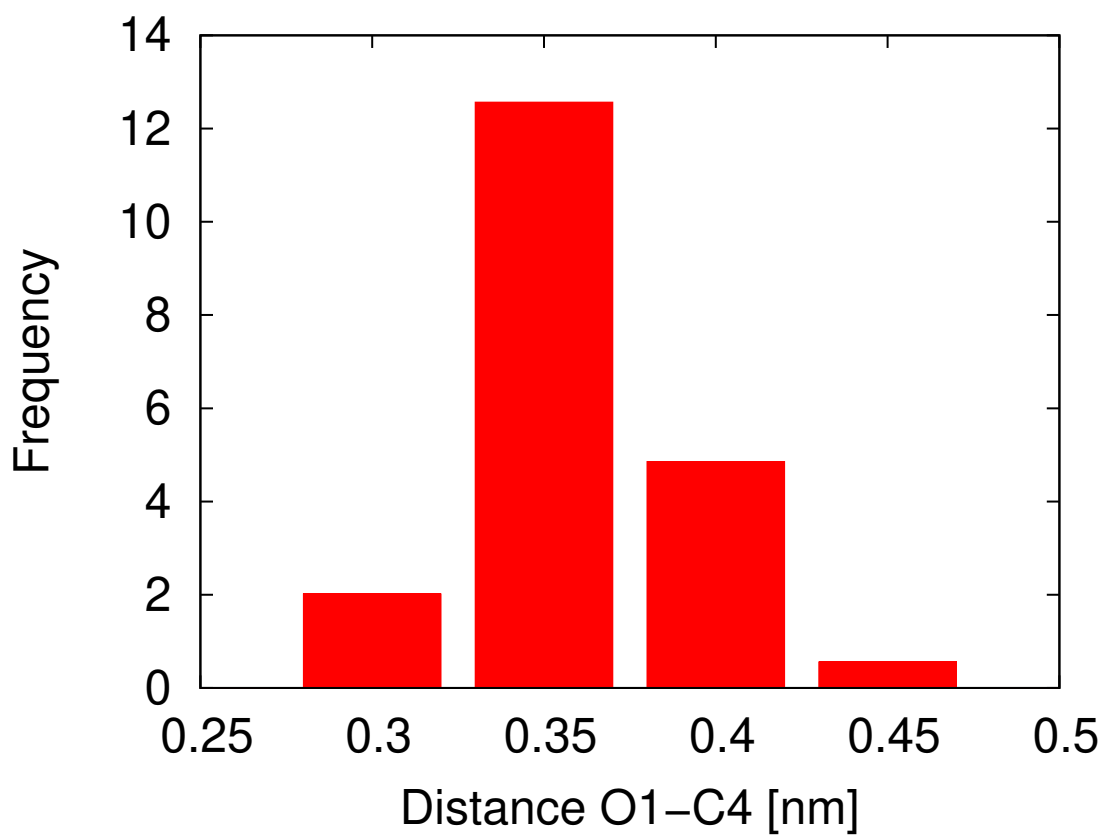

Fig. 18 Frequency distribution of the O1-C4 distance during a 1.5  $\mu$ s MD simulation.

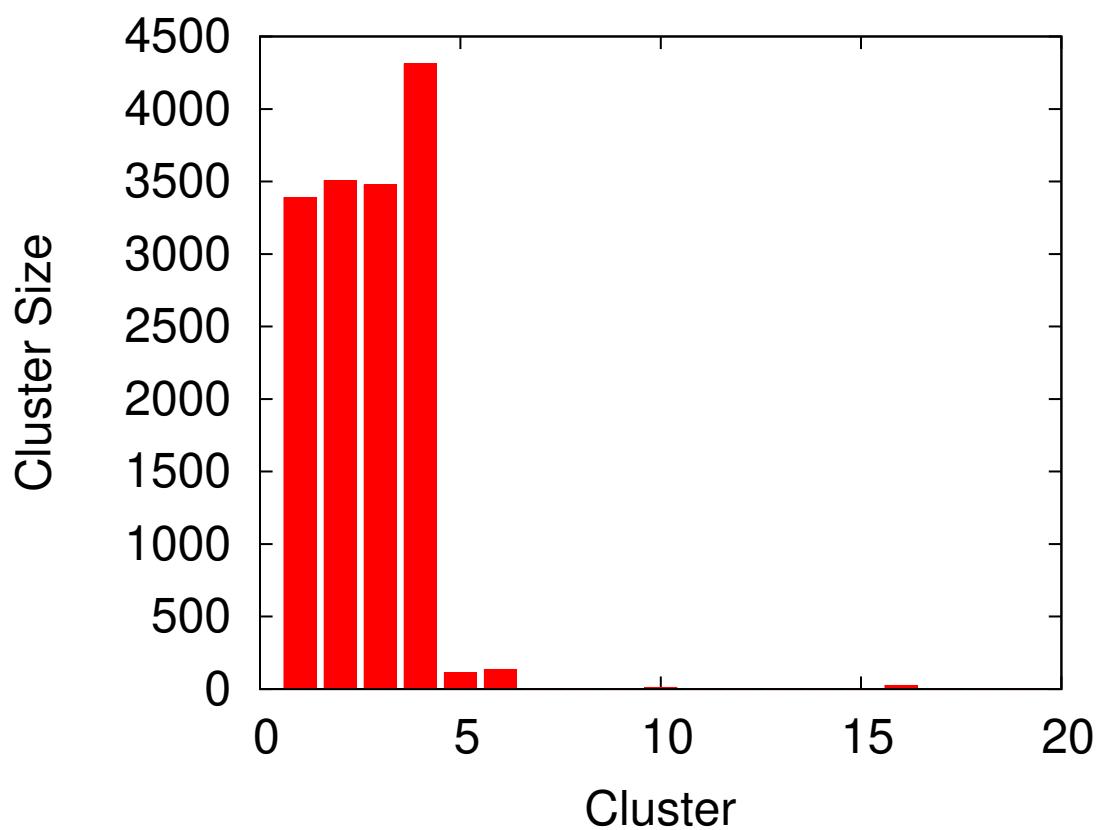

**Fig. 19** Frequency distribution of the clusters found in a NNKDI MD simulation of  $1.5 \mu$  s. The RMSD cutoff used was 0.03 nm, and there were 42 clusters found in total. Only four clusters were significantly populated. The cluster analysis was performed for every 10-th frame of the MD simulation.

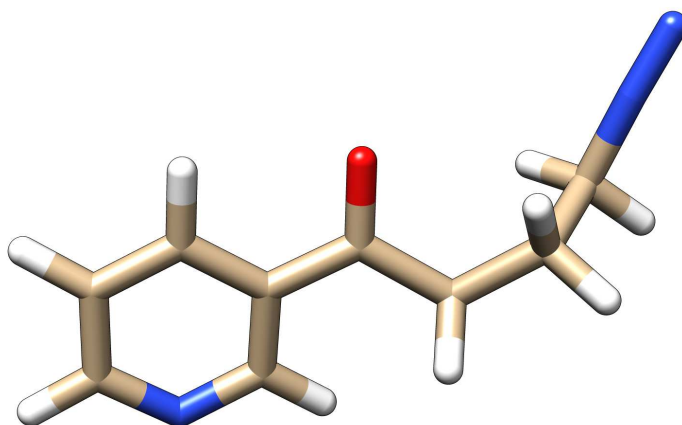

**Fig. 20** This NNKDI conformation represents the center of cluster 1. Dihedrals are a:  $173.7^\circ$ , b:  $14.0^\circ$ , c:  $-99^\circ$ , d:  $144^\circ$

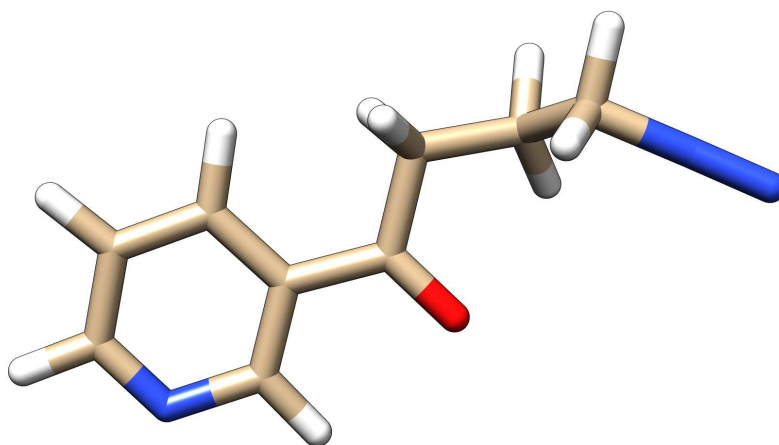

**Fig. 21** This NNKDI conformation represents the center of cluster 2. Dihedrals are a:  $-3.0^\circ$ , b:  $22.4^\circ$ , c:  $-109.5^\circ$ , d:  $144.6^\circ$

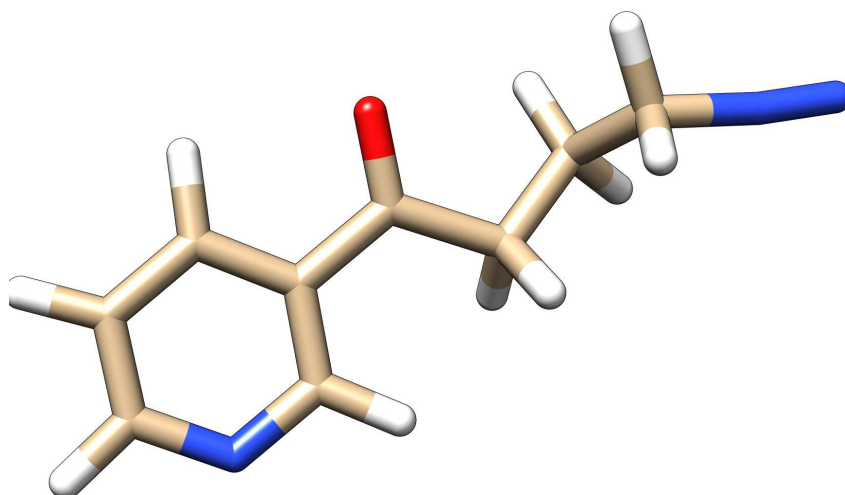

**Fig. 22** This NNKDI conformation represents the center of cluster 3. Dihedrals are a:  $-174.4^\circ$ , b:  $-16.7^\circ$ , c:  $102.1^\circ$ , d:  $129.9^\circ$

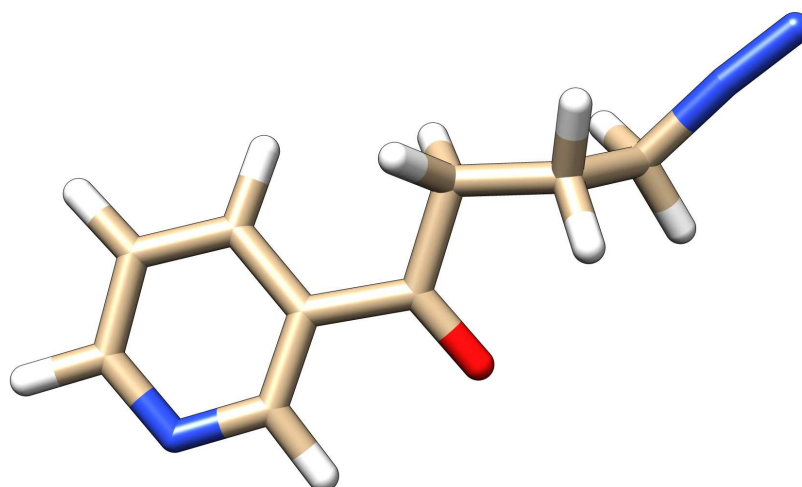

**Fig. 23** This NNKDI conformation represents the center of cluster 4. Dihedrals are a:  $9.2^\circ$ , b:  $-17.6^\circ$ , c:  $98.7^\circ$ , d:  $136.8^\circ$
