# Supplementary material for: Physico-chemical properties of 4-(methylnitrosamino)-1-(3-pyridyl)-1-butanone (NNK) diazonium ion: a theoretical investigation
Source: Royal Society of Chemistry journal article supplement (doi:10.1039/d1ra04343a), 2021-01-01
Supplement: d1ra04343a2.pdf [file d1ra04343a2.pdf]

Vibrational Analysis, NNKDI TCTT Conformer, CCSD/6-31G\*

-----  
NORMAL COORDINATE ANALYSIS IN THE HARMONIC APPROXIMATION  
-----

ATOMIC WEIGHTS (AMU)

|    |   |          |
|----|---|----------|
| 1  | N | 14.00307 |
| 2  | C | 12.00000 |
| 3  | C | 12.00000 |
| 4  | C | 12.00000 |
| 5  | C | 12.00000 |
| 6  | C | 12.00000 |
| 7  | C | 12.00000 |
| 8  | C | 12.00000 |
| 9  | C | 12.00000 |
| 10 | O | 15.99491 |
| 11 | C | 12.00000 |
| 12 | N | 14.00307 |
| 13 | N | 14.00307 |
| 14 | H | 1.00782  |
| 15 | H | 1.00782  |
| 16 | H | 1.00782  |
| 17 | H | 1.00782  |
| 18 | H | 1.00782  |
| 19 | H | 1.00782  |
| 20 | H | 1.00782  |
| 21 | H | 1.00782  |
| 22 | H | 1.00782  |
| 23 | H | 1.00782  |

MODES 1 TO 6 ARE TAKEN AS ROTATIONS AND TRANSLATIONS.

ANALYZING SYMMETRY OF NORMAL MODES...

--- SYMMETRY FOR NORMAL MODES ---

INCLUDING TRANSLATION AND ROTATION

43\*A' 26\*A''

EXCLUDING TRANSLATION AND ROTATION (SAYVETZ < 0.01)

32\*A' 11\*A''

FREQUENCIES IN CM\*\*-1, IR INTENSITIES IN DEBYE\*\*2/AMU-ANGSTROM\*\*2,  
REDUCED MASSES IN AMU.

|   |               |   | 1           | 2           | 3           | 4           | 5           |
|---|---------------|---|-------------|-------------|-------------|-------------|-------------|
|   | FREQUENCY:    |   | 21.10       | 15.52       | 10.80       | 10.31       | 10.10       |
|   | SYMMETRY:     |   | A''         | A'          | A''         | A'          | A''         |
|   | REDUCED MASS: |   | 4.87169     | 7.93016     | 7.26470     | 7.43857     | 6.61369     |
| 1 | N             | X | 0.00000000  | 0.04292050  | -0.00000000 | -0.02909884 | -0.00000000 |
|   |               | Y | 0.00000000  | 0.01710785  | 0.00000000  | 0.10538180  | 0.00000000  |
|   |               | Z | -0.04625219 | 0.00000000  | 0.00285359  | -0.00000000 | 0.15178819  |
| 2 | C             | X | 0.00000000  | 0.04750707  | -0.00000000 | -0.02377143 | -0.00000000 |
|   |               | Y | -0.00000000 | 0.00182409  | 0.00000000  | 0.08757116  | 0.00000000  |
|   |               | Z | -0.03608648 | 0.00000000  | 0.03014416  | -0.00000000 | 0.11854594  |
| 3 | C             | X | 0.00000000  | 0.06341598  | -0.00000000 | -0.00518128 | -0.00000000 |
|   |               | Y | -0.00000000 | -0.00310388 | 0.00000000  | 0.08182804  | 0.00000000  |
|   |               | Z | 0.05100219  | 0.00000000  | 0.03153450  | -0.00000000 | 0.06170792  |
| 4 | C             | X | 0.00000000  | 0.07532896  | -0.00000000 | 0.00870174  | 0.00000000  |

|    |   |   |             |             |             |             |             |
|----|---|---|-------------|-------------|-------------|-------------|-------------|
|    |   | Y | -0.00000000 | 0.00861716  | 0.00000000  | 0.09548053  | 0.00000000  |
|    |   | Z | 0.13205217  | -0.00000000 | 0.00298614  | -0.00000000 | 0.03833582  |
| 5  | C | X | 0.00000000  | 0.07076083  | -0.00000000 | 0.00335812  | 0.00000000  |
|    |   | Y | 0.00000000  | 0.02452515  | 0.00000000  | 0.11402430  | 0.00000000  |
|    |   | Z | 0.12206221  | -0.00000000 | -0.02579190 | -0.00000000 | 0.07221852  |
| 6  | C | X | 0.00000000  | 0.05447997  | -0.00000000 | -0.01562242 | -0.00000000 |
|    |   | Y | 0.00000000  | 0.02813689  | 0.00000000  | 0.11823668  | 0.00000000  |
|    |   | Z | 0.03214245  | -0.00000000 | -0.02471704 | -0.00000000 | 0.12839668  |
| 7  | C | X | 0.00000000  | 0.06813888  | -0.00000000 | 0.00040137  | -0.00000000 |
|    |   | Y | -0.00000000 | -0.01986249 | 0.00000000  | 0.06201239  | 0.00000000  |
|    |   | Z | 0.06161985  | 0.00000000  | 0.06089478  | -0.00000000 | 0.02546278  |
| 8  | C | X | 0.00000000  | 0.05568174  | -0.00000000 | -0.01466614 | -0.00000000 |
|    |   | Y | -0.00000000 | -0.03228877 | 0.00000000  | 0.04710257  | 0.00000000  |
|    |   | Z | -0.01691913 | 0.00000000  | 0.08088528  | -0.00000000 | 0.05162058  |
| 9  | C | X | 0.00000000  | 0.06327214  | -0.00000000 | -0.00546862 | -0.00000000 |
|    |   | Y | -0.00000000 | -0.04794408 | 0.00000000  | 0.02798864  | 0.00000000  |
|    |   | Z | 0.01787762  | 0.00000000  | 0.09660031  | -0.00000000 | 0.00105967  |
| 10 | O | X | 0.00000000  | 0.08163455  | 0.00000000  | 0.01661725  | 0.00000000  |
|    |   | Y | -0.00000000 | -0.02387803 | 0.00000000  | 0.05717802  | 0.00000000  |
|    |   | Z | 0.13152125  | -0.00000000 | 0.06799698  | 0.00000000  | -0.02417498 |
| 11 | C | X | 0.00000000  | 0.05138313  | -0.00000000 | -0.02053364 | -0.00000000 |
|    |   | Y | -0.00000000 | -0.05959966 | 0.00000000  | 0.01329220  | 0.00000000  |
|    |   | Z | -0.06013502 | 0.00000000  | 0.11198287  | -0.00000000 | 0.03366580  |
| 12 | N | X | 0.00000000  | 0.05841634  | -0.00000000 | -0.01160522 | -0.00000000 |
|    |   | Y | -0.00000000 | -0.07424159 | 0.00000000  | -0.00519767 | -0.00000000 |
|    |   | Z | -0.02483880 | 0.00000000  | 0.12157788  | -0.00000000 | -0.01553790 |
| 13 | N | X | 0.00000000  | 0.06412528  | -0.00000000 | -0.00468132 | -0.00000000 |
|    |   | Y | -0.00000000 | -0.08493997 | 0.00000000  | -0.01817300 | -0.00000000 |
|    |   | Z | 0.00391803  | 0.00000000  | 0.12761832  | 0.00000000  | -0.05292136 |
| 14 | H | X | 0.00000000  | 0.03777333  | -0.00000000 | -0.03514018 | -0.00000000 |
|    |   | Y | -0.00000000 | -0.00674142 | 0.00000000  | 0.07758207  | 0.00000000  |
|    |   | Z | -0.10208920 | 0.00000000  | 0.05223756  | -0.00000000 | 0.13927434  |
| 15 | H | X | 0.00000000  | 0.08783507  | 0.00000000  | 0.02322745  | 0.00000000  |
|    |   | Y | -0.00000000 | 0.00507051  | 0.00000000  | 0.09137017  | 0.00000000  |
|    |   | Z | 0.20126447  | -0.00000000 | 0.00344072  | 0.00000000  | -0.00561447 |
| 16 | H | X | 0.00000000  | 0.07956991  | -0.00000000 | 0.01360739  | 0.00000000  |
|    |   | Y | 0.00000000  | 0.03404010  | 0.00000000  | 0.12514101  | 0.00000000  |
|    |   | Z | 0.18310472  | -0.00000000 | -0.04905421 | -0.00000000 | 0.05588208  |
| 17 | H | X | 0.00000000  | 0.05046259  | -0.00000000 | -0.02028568 | -0.00000000 |
|    |   | Y | 0.00000000  | 0.04055223  | 0.00000000  | 0.13263549  | 0.00000000  |
|    |   | Z | 0.02269645  | -0.00000000 | -0.04713683 | -0.00000000 | 0.15616994  |
| 18 | H | X | -0.00576047 | 0.04836588  | 0.01216932  | -0.02355762 | -0.01466681 |
|    |   | Y | 0.05810786  | -0.03078791 | -0.00412061 | 0.04896986  | -0.03639843 |
|    |   | Z | -0.05820531 | 0.00000652  | 0.08207151  | -0.00000513 | 0.08027210  |
| 19 | H | X | 0.00576047  | 0.04836588  | -0.01216932 | -0.02355762 | 0.01466681  |
|    |   | Y | -0.05810786 | -0.03078791 | 0.00412061  | 0.04896986  | 0.03639843  |
|    |   | Z | -0.05820531 | -0.00000652 | 0.08207151  | 0.00000513  | 0.08027210  |
| 20 | H | X | 0.00555965  | 0.07041803  | -0.01073222 | 0.00332377  | 0.01324951  |
|    |   | Y | -0.05785377 | -0.04909333 | 0.00217621  | 0.02651412  | 0.03932793  |
|    |   | Z | 0.05893006  | -0.00004156 | 0.09630492  | 0.00000680  | -0.02891766 |
| 21 | H | X | -0.00555965 | 0.07041803  | 0.01073222  | 0.00332377  | -0.01324951 |
|    |   | Y | 0.05785377  | -0.04909333 | -0.00217621 | 0.02651412  | -0.03932793 |
|    |   | Z | 0.05893006  | 0.00004156  | 0.09630492  | -0.00000680 | -0.02891766 |
| 22 | H | X | -0.00518229 | 0.04484053  | 0.00855069  | -0.02902645 | -0.01327190 |
|    |   | Y | 0.05935931  | -0.05987424 | -0.00418721 | 0.01297014  | -0.04013985 |
|    |   | Z | -0.10133124 | 0.00000633  | 0.11511119  | -0.00000934 | 0.06105926  |
| 23 | H | X | 0.00518229  | 0.04484053  | -0.00855069 | -0.02902645 | 0.01327190  |
|    |   | Y | -0.05935931 | -0.05987424 | 0.00418721  | 0.01297014  | 0.04013985  |
|    |   | Z | -0.10133124 | -0.00000633 | 0.11511119  | 0.00000934  | 0.06105926  |

|                |       |             |             |             |             |             |
|----------------|-------|-------------|-------------|-------------|-------------|-------------|
| TRANS. SAYVETZ | X     | 0.00000000  | 10.80978999 | -0.00000000 | -1.36115886 | -0.00000000 |
|                | Y     | -0.00000000 | -3.77594810 | 0.00000000  | 10.44176332 | 0.00000000  |
|                | Z     | 4.91100860  | 0.00000000  | 9.54204418  | -0.00000000 | 7.72735245  |
|                | TOTAL | 4.91100860  | 11.45029885 | 9.54204418  | 10.53010801 | 7.72735245  |

|              |       |             |              |              |              |              |
|--------------|-------|-------------|--------------|--------------|--------------|--------------|
| ROT. SAYVETZ | X     | 21.28837828 | -0.00000000  | -0.48091910  | 0.00000000   | -12.68252441 |
|              | Y     | 27.71764412 | -0.00000000  | -54.30170717 | -0.00000000  | 50.66625671  |
|              | Z     | -0.00000000 | -42.14297816 | -0.00000000  | -50.75369828 | -0.00000000  |
|              | TOTAL | 34.94943269 | 42.14297816  | 54.30383674  | 50.75369828  | 52.22945524  |

|               |  |         |         |         |         |         |
|---------------|--|---------|---------|---------|---------|---------|
|               |  | 6       | 7       | 8       | 9       | 10      |
| FREQUENCY:    |  | 1.26    | 28.22   | 45.98   | 67.40   | 78.69   |
| SYMMETRY:     |  | A'      | A''     | A''     | A'      | A''     |
| REDUCED MASS: |  | 7.53492 | 6.94393 | 3.25041 | 7.35988 | 2.70389 |

|    |   |   |             |             |             |             |             |
|----|---|---|-------------|-------------|-------------|-------------|-------------|
| 1  | N | X | 0.06521521  | -0.00000000 | 0.00000000  | -0.05495176 | 0.00000000  |
|    |   | Y | -0.00552890 | -0.00000000 | -0.00000000 | 0.03203789  | -0.00000000 |
|    |   | Z | 0.00000000  | 0.00079933  | -0.08720939 | 0.00000000  | -0.01835634 |
| 2  | C | X | 0.05967001  | -0.00000000 | 0.00000000  | -0.04068739 | 0.00000000  |
|    |   | Y | 0.01297166  | -0.00000000 | -0.00000000 | -0.01408234 | 0.00000000  |
|    |   | Z | 0.00000000  | -0.04951613 | -0.07747277 | 0.00000000  | -0.01833034 |
| 3  | C | X | 0.04041466  | 0.00000000  | -0.00000000 | 0.00475850  | -0.00000000 |
|    |   | Y | 0.01892920  | -0.00000000 | -0.00000000 | -0.02866701 | 0.00000000  |
|    |   | Z | 0.00000000  | -0.02914742 | -0.00509942 | 0.00000000  | -0.00291499 |
| 4  | C | X | 0.02603174  | 0.00000000  | -0.00000000 | 0.03959341  | -0.00000000 |
|    |   | Y | 0.00476882  | -0.00000000 | -0.00000000 | 0.00602603  | -0.00000000 |
|    |   | Z | 0.00000000  | 0.04477899  | 0.06157145  | 0.00000000  | 0.01106940  |
| 5  | C | X | 0.03156024  | 0.00000000  | -0.00000000 | 0.02639736  | -0.00000000 |
|    |   | Y | -0.01447949 | -0.00000000 | -0.00000000 | 0.05397647  | -0.00000000 |
|    |   | Z | 0.00000000  | 0.09987122  | 0.05801834  | 0.00000000  | 0.01747326  |
| 6  | C | X | 0.05125406  | 0.00000000  | 0.00000000  | -0.02101683 | 0.00000000  |
|    |   | Y | -0.01884040 | -0.00000000 | -0.00000000 | 0.06448261  | -0.00000000 |
|    |   | Z | 0.00000000  | 0.07633171  | -0.01865144 | 0.00000000  | 0.00191885  |
| 7  | C | X | 0.03464637  | 0.00000000  | -0.00000000 | 0.01477601  | -0.00000000 |
|    |   | Y | 0.03940509  | -0.00000000 | -0.00000000 | -0.06729165 | 0.00000000  |
|    |   | Z | -0.00000000 | -0.07569957 | -0.00511714 | 0.00000000  | -0.01600835 |
| 8  | C | X | 0.04999816  | 0.00000000  | -0.00000000 | 0.00347651  | -0.00000000 |
|    |   | Y | 0.05467235  | -0.00000000 | 0.00000000  | -0.08068000 | 0.00000000  |
|    |   | Z | -0.00000000 | -0.06477637 | 0.06219901  | 0.00000000  | 0.08366160  |
| 9  | C | X | 0.04076381  | 0.00000000  | -0.00000000 | -0.00271604 | -0.00000000 |
|    |   | Y | 0.07383162  | -0.00000000 | 0.00000000  | -0.06719919 | 0.00000000  |
|    |   | Z | -0.00000000 | -0.03187225 | 0.00166579  | 0.00000000  | 0.17052550  |
| 10 | O | X | 0.01799308  | 0.00000000  | -0.00000000 | 0.03656692  | -0.00000000 |
|    |   | Y | 0.04436097  | -0.00000000 | 0.00000000  | -0.07324936 | 0.00000000  |
|    |   | Z | -0.00000000 | -0.11018262 | -0.04509644 | -0.00000000 | -0.10484353 |
| 11 | C | X | 0.05521032  | 0.00000000  | 0.00000000  | 0.03898468  | -0.00000000 |
|    |   | Y | 0.08796871  | -0.00000000 | 0.00000000  | -0.02604400 | 0.00000000  |
|    |   | Z | -0.00000000 | 0.00982796  | 0.13651604  | -0.00000000 | -0.05164600 |
| 12 | N | X | 0.04696074  | 0.00000000  | -0.00000000 | -0.00124611 | -0.00000000 |
|    |   | Y | 0.10528863  | -0.00000000 | 0.00000000  | 0.06076873  | 0.00000000  |
|    |   | Z | -0.00000000 | 0.07974881  | 0.00195606  | -0.00000000 | -0.03422110 |
| 13 | N | X | 0.04068735  | 0.00000000  | -0.00000000 | -0.04917368 | 0.00000000  |
|    |   | Y | 0.11704859  | -0.00000000 | 0.00000000  | 0.15075015  | -0.00000000 |
|    |   | Z | -0.00000000 | 0.13501845  | -0.11237867 | -0.00000000 | -0.02091851 |
| 14 | H | X | 0.07146130  | -0.00000000 | 0.00000000  | -0.06785546 | 0.00000000  |
|    |   | Y | 0.02335108  | -0.00000000 | -0.00000000 | -0.03847050 | 0.00000000  |
|    |   | Z | 0.00000000  | -0.11246979 | -0.13413969 | 0.00000000  | -0.03641480 |
| 15 | H | X | 0.01101065  | 0.00000000  | -0.00000000 | 0.07695366  | -0.00000000 |
|    |   | Y | 0.00902562  | -0.00000000 | -0.00000000 | -0.00472679 | -0.00000000 |
|    |   | Z | 0.00000000  | 0.06001938  | 0.11583304  | 0.00000000  | 0.01812363  |

|    |   |   |             |             |             |             |             |
|----|---|---|-------------|-------------|-------------|-------------|-------------|
| 16 | H | X | 0.02091055  | 0.00000000  | -0.00000000 | 0.05252398  | -0.00000000 |
|    |   | Y | -0.02599204 | -0.00000000 | -0.00000000 | 0.08221557  | -0.00000000 |
|    |   | Z | 0.00000000  | 0.16085446  | 0.11192449  | 0.00000000  | 0.03237313  |
| 17 | H | X | 0.05608044  | -0.00000000 | 0.00000000  | -0.03271266 | 0.00000000  |
|    |   | Y | -0.03369517 | -0.00000000 | -0.00000000 | 0.10053264  | -0.00000000 |
|    |   | Z | 0.00000000  | 0.11988618  | -0.02517393 | 0.00000000  | 0.00518250  |
| 18 | H | X | 0.05900876  | 0.01700407  | -0.00161746 | 0.00282760  | 0.05789286  |
|    |   | Y | 0.05276340  | 0.00718526  | -0.06499572 | -0.07971112 | -0.00596761 |
|    |   | Z | 0.00001167  | -0.07275848 | 0.11022975  | -0.00051751 | 0.07771362  |
| 19 | H | X | 0.05900876  | -0.01700407 | 0.00161746  | 0.00282760  | -0.05789286 |
|    |   | Y | 0.05276340  | -0.00718526 | 0.06499572  | -0.07971112 | 0.00596761  |
|    |   | Z | -0.00001167 | -0.07275848 | 0.11022975  | 0.00051751  | 0.07771362  |
| 20 | H | X | 0.03211777  | -0.02658928 | -0.00732507 | -0.01739658 | 0.02744908  |
|    |   | Y | 0.07526477  | 0.00620509  | 0.10194309  | -0.06277523 | -0.15250806 |
|    |   | Z | 0.00000804  | -0.03292872 | -0.07142040 | -0.00146610 | 0.27807964  |
| 21 | H | X | 0.03211777  | 0.02658928  | 0.00732507  | -0.01739658 | -0.02744908 |
|    |   | Y | 0.07526477  | -0.00620509 | -0.10194309 | -0.06277523 | 0.15250806  |
|    |   | Z | -0.00000804 | -0.03292872 | -0.07142040 | 0.00146610  | 0.27807964  |
| 22 | H | X | 0.06316593  | 0.04208187  | -0.02202800 | 0.07321754  | -0.05391685 |
|    |   | Y | 0.08829191  | 0.00526291  | -0.13365176 | -0.02369158 | 0.14289846  |
|    |   | Z | -0.00000429 | 0.00738967  | 0.22825108  | -0.00056044 | -0.15199326 |
| 23 | H | X | 0.06316593  | -0.04208187 | 0.02202800  | 0.07321754  | 0.05391685  |
|    |   | Y | 0.08829191  | -0.00526291 | 0.13365176  | -0.02369158 | -0.14289846 |
|    |   | Z | 0.00000429  | 0.00738967  | 0.22825108  | 0.00056044  | -0.15199326 |

|                |   |             |             |             |            |             |
|----------------|---|-------------|-------------|-------------|------------|-------------|
| TRANS. SAYVETZ | X | 7.57465610  | 0.00000000  | -0.00000000 | 0.01950452 | -0.00000000 |
|                | Y | 7.26476380  | -0.00000000 | -0.00000000 | 0.13086282 | 0.00000000  |
|                | Z | 0.00000000  | 1.04575402  | -0.31793010 | 0.00000000 | 0.07306011  |
| TOTAL          |   | 10.49534220 | 1.04575402  | 0.31793010  | 0.13230836 | 0.07306011  |

|              |   |             |             |             |             |             |
|--------------|---|-------------|-------------|-------------|-------------|-------------|
| ROT. SAYVETZ | X | -0.00000000 | -1.83790256 | 0.00234611  | -0.00000000 | -0.41987891 |
|              | Y | 0.00000000  | -9.38374937 | -0.83230141 | 0.00000000  | 0.73774840  |
|              | Z | 51.01799459 | -0.00000000 | 0.00000000  | 1.48113995  | 0.00000000  |
| TOTAL        |   | 51.01799459 | 9.56204152  | 0.83230472  | 1.48113995  | 0.84886454  |

|               | 11      | 12      | 13      | 14      | 15      |
|---------------|---------|---------|---------|---------|---------|
| FREQUENCY:    | 116.25  | 143.98  | 165.56  | 258.92  | 279.57  |
| SYMMETRY:     | A''     | A'      | A''     | A'      | A'      |
| REDUCED MASS: | 2.75119 | 7.91619 | 3.54157 | 5.14214 | 6.73098 |

|   |   |   |             |             |             |             |             |
|---|---|---|-------------|-------------|-------------|-------------|-------------|
| 1 | N | X | -0.00000000 | -0.08121820 | 0.00000000  | -0.00884574 | 0.05196229  |
|   |   | Y | -0.00000000 | 0.00924974  | 0.00000000  | -0.00269049 | 0.00042787  |
|   |   | Z | -0.03711792 | -0.00000000 | -0.01748951 | -0.00000000 | -0.00000000 |
| 2 | C | X | 0.00000000  | -0.06571465 | 0.00000000  | 0.01015639  | 0.03891274  |
|   |   | Y | -0.00000000 | -0.03465876 | 0.00000000  | -0.06478215 | 0.02698630  |
|   |   | Z | 0.02652939  | 0.00000000  | 0.10233979  | -0.00000000 | -0.00000000 |
| 3 | C | X | 0.00000000  | -0.02323243 | -0.00000000 | 0.04396371  | 0.00677281  |
|   |   | Y | -0.00000000 | -0.04751160 | 0.00000000  | -0.07486569 | 0.03184931  |
|   |   | Z | 0.06131943  | 0.00000000  | 0.12107920  | -0.00000000 | 0.00000000  |
| 4 | C | X | 0.00000000  | 0.00342265  | -0.00000000 | 0.09643001  | 0.00695908  |
|   |   | Y | -0.00000000 | -0.01937352 | 0.00000000  | -0.03454208 | 0.02887289  |
|   |   | Z | 0.05305881  | 0.00000000  | 0.09581960  | -0.00000000 | 0.00000000  |
| 5 | C | X | 0.00000000  | -0.00906978 | -0.00000000 | 0.08570921  | 0.01623664  |
|   |   | Y | -0.00000000 | 0.02703366  | 0.00000000  | 0.02983518  | -0.00100266 |
|   |   | Z | -0.00340591 | 0.00000000  | -0.01534927 | 0.00000000  | 0.00000000  |
| 6 | C | X | 0.00000000  | -0.05243302 | 0.00000000  | 0.03533567  | 0.04294124  |
|   |   | Y | -0.00000000 | 0.03715707  | 0.00000000  | 0.04222106  | -0.00910211 |
|   |   | Z | -0.05868812 | -0.00000000 | -0.10398486 | 0.00000000  | -0.00000000 |
| 7 | C | X | 0.00000000  | -0.01811176 | -0.00000000 | 0.01271413  | 0.00193858  |
|   |   | Y | -0.00000000 | -0.04616095 | 0.00000000  | -0.02953795 | -0.03289471 |

|                |   |       |             |             |             |             |             |
|----------------|---|-------|-------------|-------------|-------------|-------------|-------------|
|                |   | Z     | 0.03902036  | 0.00000000  | 0.00629869  | 0.00000000  | 0.00000000  |
| 8              | C | X     | -0.00000000 | 0.02382078  | -0.00000000 | 0.03620514  | -0.05551304 |
|                |   | Y     | -0.00000000 | -0.00803480 | 0.00000000  | 0.03610334  | -0.07473525 |
|                |   | Z     | 0.12315322  | 0.00000000  | -0.09938573 | -0.00000000 | 0.00000000  |
| 9              | C | X     | -0.00000000 | 0.00670393  | -0.00000000 | -0.00939087 | -0.10171551 |
|                |   | Y     | -0.00000000 | 0.05105697  | 0.00000000  | 0.09579874  | -0.00318342 |
|                |   | Z     | -0.09635346 | -0.00000000 | 0.01115946  | 0.00000000  | -0.00000000 |
| 10             | O | X     | 0.00000000  | -0.04532194 | -0.00000000 | -0.04136907 | 0.08570588  |
|                |   | Y     | -0.00000000 | -0.03783780 | 0.00000000  | -0.01221218 | -0.05732564 |
|                |   | Z     | -0.05574182 | -0.00000000 | -0.07597695 | 0.00000000  | -0.00000000 |
| 11             | C | X     | -0.00000000 | 0.04114613  | -0.00000000 | -0.07369696 | -0.05172903 |
|                |   | Y     | -0.00000000 | 0.08431100  | -0.00000000 | 0.04973356  | 0.07412484  |
|                |   | Z     | -0.08911136 | -0.00000000 | 0.02886666  | 0.00000000  | 0.00000000  |
| 12             | N | X     | -0.00000000 | 0.06769999  | -0.00000000 | -0.07368367 | -0.06871774 |
|                |   | Y     | -0.00000000 | 0.05404366  | 0.00000000  | -0.03195973 | 0.10109420  |
|                |   | Z     | -0.01906627 | -0.00000000 | 0.01379503  | 0.00000000  | 0.00000000  |
| 13             | N | X     | -0.00000000 | 0.13827247  | -0.00000000 | -0.08244199 | 0.02440319  |
|                |   | Y     | 0.00000000  | -0.07735434 | 0.00000000  | -0.01904486 | -0.07494164 |
|                |   | Z     | 0.07530286  | -0.00000000 | -0.01816001 | -0.00000000 | -0.00000000 |
| 14             | H | X     | -0.00000000 | -0.08945386 | 0.00000000  | -0.01915632 | 0.05709834  |
|                |   | Y     | -0.00000000 | -0.05713830 | 0.00000000  | -0.09214625 | 0.04477246  |
|                |   | Z     | 0.04508007  | 0.00000000  | 0.16132328  | -0.00000000 | -0.00000000 |
| 15             | H | X     | 0.00000000  | 0.03611576  | -0.00000000 | 0.15515978  | -0.00354427 |
|                |   | Y     | -0.00000000 | -0.02905882 | 0.00000000  | -0.05247315 | 0.03227983  |
|                |   | Z     | 0.08065606  | 0.00000000  | 0.12536010  | 0.00000000  | 0.00000000  |
| 16             | H | X     | 0.00000000  | 0.01644833  | -0.00000000 | 0.11635730  | -0.00278534 |
|                |   | Y     | -0.00000000 | 0.05466956  | 0.00000000  | 0.06253328  | -0.02171949 |
|                |   | Z     | -0.01426959 | 0.00000000  | -0.05943948 | 0.00000000  | -0.00000000 |
| 17             | H | X     | 0.00000000  | -0.06262498 | 0.00000000  | 0.02119965  | 0.04736274  |
|                |   | Y     | -0.00000000 | 0.06845281  | -0.00000000 | 0.08644101  | -0.02231475 |
|                |   | Z     | -0.12012784 | -0.00000000 | -0.24072609 | 0.00000000  | -0.00000000 |
| 18             | H | X     | -0.06961044 | 0.04762761  | 0.01405882  | 0.06410012  | -0.04703631 |
|                |   | Y     | -0.14645183 | -0.01408639 | 0.11914677  | 0.02919470  | -0.07065159 |
|                |   | Z     | 0.24080742  | 0.00017790  | -0.18881331 | 0.00000895  | -0.00318068 |
| 19             | H | X     | 0.06961044  | 0.04762761  | -0.01405882 | 0.06410012  | -0.04703631 |
|                |   | Y     | 0.14645183  | -0.01408639 | -0.11914677 | 0.02919470  | -0.07065159 |
|                |   | Z     | 0.24080742  | -0.00017790 | -0.18881331 | -0.00000895 | 0.00318068  |
| 20             | H | X     | 0.08545053  | -0.01956213 | -0.04890239 | -0.01140855 | -0.14710534 |
|                |   | Y     | 0.09617000  | 0.05454793  | -0.04216236 | 0.09056625  | 0.00572427  |
|                |   | Z     | -0.17573176 | 0.00015396  | 0.04777082  | 0.00345711  | -0.00262605 |
| 21             | H | X     | -0.08545053 | -0.01956213 | 0.04890239  | -0.01140855 | -0.14710534 |
|                |   | Y     | -0.09617000 | 0.05454793  | 0.04216236  | 0.09056625  | 0.00572427  |
|                |   | Z     | -0.17573176 | -0.00015396 | 0.04777082  | -0.00345711 | 0.00262605  |
| 22             | H | X     | 0.02792102  | 0.04788488  | 0.00062312  | -0.12771572 | -0.02163082 |
|                |   | Y     | 0.01606824  | 0.08318168  | -0.01385356 | 0.04586356  | 0.07470520  |
|                |   | Z     | -0.09908543 | 0.00076564  | 0.03825155  | 0.00111031  | -0.00008892 |
| 23             | H | X     | -0.02792102 | 0.04788488  | -0.00062312 | -0.12771572 | -0.02163082 |
|                |   | Y     | -0.01606824 | 0.08318168  | 0.01385356  | 0.04586356  | 0.07470520  |
|                |   | Z     | -0.09908543 | -0.00076564 | 0.03825155  | -0.00111031 | 0.00008892  |
| TRANS. SAYVETZ |   | X     | -0.00000000 | -0.04679976 | -0.00000000 | 0.00179497  | -0.00043076 |
|                |   | Y     | -0.00000000 | 0.01015600  | 0.00000000  | -0.00943069 | -0.00074313 |
|                |   | Z     | -0.03487797 | 0.00000000  | 0.02006966  | 0.00000000  | 0.00000000  |
|                |   | TOTAL | 0.03487797  | 0.04788906  | 0.02006966  | 0.00959999  | 0.00085895  |
| ROT. SAYVETZ   |   | X     | 0.07119219  | -0.00000000 | -0.02933694 | 0.00000000  | 0.00000000  |
|                |   | Y     | -0.17258222 | 0.00000000  | -0.01980313 | -0.00000000 | -0.00000000 |
|                |   | Z     | -0.00000000 | -0.01314303 | 0.00000000  | -0.07011382 | -0.10293544 |
|                |   | TOTAL | 0.18668945  | 0.01314303  | 0.03539520  | 0.07011382  | 0.10293544  |

|               |  |         |         |         |         |         |
|---------------|--|---------|---------|---------|---------|---------|
|               |  | 16      | 17      | 18      | 19      | 20      |
| FREQUENCY:    |  | 340.56  | 374.93  | 382.94  | 408.78  | 462.23  |
| SYMMETRY:     |  | A''     | A'      | A''     | A''     | A'      |
| REDUCED MASS: |  | 4.43545 | 6.20705 | 2.96274 | 4.28361 | 7.83246 |

|    |   |   |             |             |             |             |             |
|----|---|---|-------------|-------------|-------------|-------------|-------------|
| 1  | N | X | -0.00000000 | -0.03146224 | -0.00000000 | 0.00000000  | -0.05850031 |
|    |   | Y | 0.00000000  | 0.00137775  | -0.00000000 | -0.00000000 | -0.00483187 |
|    |   | Z | 0.00086982  | 0.00000000  | -0.04201618 | 0.12665112  | 0.00000000  |
| 2  | C | X | -0.00000000 | -0.03451597 | -0.00000000 | 0.00000000  | -0.03575746 |
|    |   | Y | 0.00000000  | 0.02755105  | 0.00000000  | -0.00000000 | -0.04407508 |
|    |   | Z | 0.00172571  | -0.00000000 | 0.11419780  | -0.01894286 | -0.00000000 |
| 3  | C | X | -0.00000000 | -0.01357349 | -0.00000000 | -0.00000000 | 0.03819321  |
|    |   | Y | 0.00000000  | 0.02654452  | 0.00000000  | -0.00000000 | -0.03636173 |
|    |   | Z | -0.00218774 | 0.00000000  | -0.09641134 | -0.12307536 | 0.00000000  |
| 4  | C | X | -0.00000000 | -0.05705249 | -0.00000000 | -0.00000000 | 0.01470224  |
|    |   | Y | 0.00000000  | -0.00022495 | -0.00000000 | -0.00000000 | -0.07185569 |
|    |   | Z | 0.00152553  | 0.00000000  | -0.06573845 | 0.13093319  | 0.00000000  |
| 5  | C | X | -0.00000000 | -0.06190178 | -0.00000000 | -0.00000000 | -0.00617398 |
|    |   | Y | -0.00000000 | -0.02533900 | -0.00000000 | -0.00000000 | -0.02596177 |
|    |   | Z | 0.00143554  | -0.00000000 | 0.14668469  | -0.04752735 | -0.00000000 |
| 6  | C | X | -0.00000000 | -0.05825862 | -0.00000000 | 0.00000000  | -0.06318714 |
|    |   | Y | -0.00000000 | -0.02595125 | -0.00000000 | -0.00000000 | -0.00299830 |
|    |   | Z | -0.00234980 | 0.00000000  | -0.07339767 | -0.07527029 | 0.00000000  |
| 7  | C | X | 0.00000000  | 0.03780661  | 0.00000000  | -0.00000000 | 0.05372257  |
|    |   | Y | -0.00000000 | -0.03236225 | -0.00000000 | 0.00000000  | 0.07451356  |
|    |   | Z | -0.00274075 | 0.00000000  | -0.05610405 | -0.09168882 | -0.00000000 |
| 8  | C | X | 0.00000000  | 0.07714805  | 0.00000000  | -0.00000000 | 0.00579317  |
|    |   | Y | 0.00000000  | 0.00414503  | 0.00000000  | 0.00000000  | 0.05333311  |
|    |   | Z | 0.00775913  | 0.00000000  | 0.00342049  | 0.00321435  | 0.00000000  |
| 9  | C | X | 0.00000000  | 0.04202895  | 0.00000000  | -0.00000000 | 0.02710419  |
|    |   | Y | 0.00000000  | 0.09976039  | 0.00000000  | -0.00000000 | -0.04562765 |
|    |   | Z | -0.02704394 | 0.00000000  | 0.00668727  | 0.00953258  | 0.00000000  |
| 10 | O | X | 0.00000000  | 0.13567269  | 0.00000000  | -0.00000000 | 0.09073954  |
|    |   | Y | -0.00000000 | -0.06131785 | -0.00000000 | 0.00000000  | 0.07195279  |
|    |   | Z | 0.00203555  | -0.00000000 | 0.02891447  | 0.03288089  | -0.00000000 |
| 11 | C | X | 0.00000000  | -0.01841414 | -0.00000000 | -0.00000000 | 0.02931077  |
|    |   | Y | -0.00000000 | 0.04650665  | 0.00000000  | -0.00000000 | -0.02677075 |
|    |   | Z | -0.05200082 | 0.00000000  | 0.00145418  | 0.00203928  | 0.00000000  |
| 12 | N | X | 0.00000000  | 0.00008663  | -0.00000000 | -0.00000000 | -0.09172192 |
|    |   | Y | -0.00000000 | -0.06521843 | -0.00000000 | 0.00000000  | 0.09724144  |
|    |   | Z | 0.20402458  | -0.00000000 | -0.00476016 | -0.00573711 | 0.00000000  |
| 13 | N | X | -0.00000000 | -0.04355018 | -0.00000000 | -0.00000000 | -0.01326087 |
|    |   | Y | 0.00000000  | 0.01407682  | 0.00000000  | -0.00000000 | -0.05649148 |
|    |   | Z | -0.12188775 | 0.00000000  | 0.00227813  | 0.00242156  | -0.00000000 |
| 14 | H | X | -0.00000000 | -0.02712364 | -0.00000000 | 0.00000000  | -0.08263871 |
|    |   | Y | 0.00000000  | 0.03256593  | 0.00000000  | -0.00000000 | -0.08714963 |
|    |   | Z | 0.00580944  | -0.00000000 | 0.33704191  | -0.01743724 | -0.00000000 |
| 15 | H | X | -0.00000000 | -0.09955559 | -0.00000000 | -0.00000000 | 0.01085161  |
|    |   | Y | 0.00000000  | 0.01357808  | 0.00000000  | -0.00000000 | -0.06988682 |
|    |   | Z | 0.00314302  | 0.00000000  | -0.12559358 | 0.31888459  | 0.00000000  |
| 16 | H | X | -0.00000000 | -0.06471837 | -0.00000000 | -0.00000000 | 0.03686833  |
|    |   | Y | -0.00000000 | -0.02772154 | -0.00000000 | -0.00000000 | 0.02054756  |
|    |   | Z | 0.00317031  | -0.00000000 | 0.29549700  | -0.03994952 | -0.00000000 |
| 17 | H | X | -0.00000000 | -0.05244152 | -0.00000000 | 0.00000000  | -0.06820675 |
|    |   | Y | -0.00000000 | -0.04509266 | -0.00000000 | -0.00000000 | 0.01141277  |
|    |   | Z | -0.00627747 | 0.00000000  | -0.22075876 | -0.16707244 | 0.00000000  |
| 18 | H | X | -0.01738235 | 0.13247240  | 0.01746194  | 0.03653068  | -0.03945716 |
|    |   | Y | -0.03559760 | -0.00826144 | -0.06167154 | -0.10389957 | 0.06024452  |
|    |   | Z | 0.03642428  | -0.00027506 | 0.04610261  | 0.07372803  | 0.00157589  |
| 19 | H | X | 0.01738235  | 0.13247240  | -0.01746194 | -0.03653068 | -0.03945716 |

|    |   |   |             |             |             |             |             |
|----|---|---|-------------|-------------|-------------|-------------|-------------|
|    |   | Y | 0.03559760  | -0.00826144 | 0.06167154  | 0.10389957  | 0.06024452  |
|    |   | Z | 0.03642428  | 0.00027506  | 0.04610261  | 0.07372803  | -0.00157589 |
| 20 | H | X | 0.00833534  | 0.03713993  | -0.00167000 | -0.00355836 | 0.05999632  |
|    |   | Y | -0.00878378 | 0.09289403  | -0.00284274 | -0.00541914 | -0.04435444 |
|    |   | Z | -0.02133866 | 0.00389621  | 0.00864953  | 0.01341157  | -0.00351530 |
| 21 | H | X | -0.00833534 | 0.03713993  | 0.00167000  | 0.00355836  | 0.05999632  |
|    |   | Y | 0.00878378  | 0.09289403  | 0.00284274  | 0.00541914  | -0.04435444 |
|    |   | Z | -0.02133866 | -0.00389621 | 0.00864953  | 0.01341157  | 0.00351530  |
| 22 | H | X | 0.14624435  | -0.08384968 | -0.00547805 | -0.00687560 | 0.06742460  |
|    |   | Y | 0.17081289  | 0.04067101  | 0.00175173  | 0.00388334  | -0.02389914 |
|    |   | Z | -0.16915928 | 0.00263677  | 0.00020439  | -0.00066712 | -0.00290614 |
| 23 | H | X | -0.14624435 | -0.08384968 | 0.00547805  | 0.00687560  | 0.06742460  |
|    |   | Y | -0.17081289 | 0.04067101  | -0.00175173 | -0.00388334 | -0.02389914 |
|    |   | Z | -0.16915928 | -0.00263677 | 0.00020439  | -0.00066712 | 0.00290614  |

|                |       |             |             |             |             |             |
|----------------|-------|-------------|-------------|-------------|-------------|-------------|
| TRANS. SAYVETZ | X     | 0.00000000  | 0.00720715  | -0.00000000 | -0.00000000 | -0.00003193 |
|                | Y     | -0.00000000 | -0.00436881 | 0.00000000  | -0.00000000 | 0.00199189  |
|                | Z     | 0.00371313  | 0.00000000  | 0.00808688  | -0.00695725 | 0.00000000  |
|                | TOTAL | 0.00371313  | 0.00842790  | 0.00808688  | 0.00695725  | 0.00199215  |

|              |       |             |             |            |             |             |
|--------------|-------|-------------|-------------|------------|-------------|-------------|
| ROT. SAYVETZ | X     | -0.01303476 | -0.00000000 | 0.03221076 | -0.00989823 | -0.00000000 |
|              | Y     | -0.00959464 | -0.00000000 | 0.01863838 | -0.06531396 | -0.00000000 |
|              | Z     | -0.00000000 | -0.02803960 | 0.00000000 | 0.00000000  | 0.02682560  |
|              | TOTAL | 0.01618525  | 0.02803960  | 0.03721455 | 0.06605974  | 0.02682560  |

|               | 21      | 22      | 23      | 24      | 25      |
|---------------|---------|---------|---------|---------|---------|
| FREQUENCY:    | 511.56  | 588.95  | 632.13  | 664.39  | 684.74  |
| SYMMETRY:     | A'      | A''     | A'      | A'      | A''     |
| REDUCED MASS: | 6.13638 | 2.54563 | 7.80774 | 6.65116 | 3.44833 |

|    |   |   |             |             |             |             |             |
|----|---|---|-------------|-------------|-------------|-------------|-------------|
| 1  | N | X | -0.02649864 | 0.00000000  | 0.06954141  | -0.00957358 | -0.00000000 |
|    |   | Y | -0.01252544 | 0.00000000  | 0.14275717  | -0.00626998 | 0.00000000  |
|    |   | Z | 0.00000000  | 0.05215951  | -0.00000000 | 0.00000000  | 0.11991876  |
| 2  | C | X | -0.01286386 | 0.00000000  | 0.09707187  | -0.00865790 | -0.00000000 |
|    |   | Y | -0.04574767 | -0.00000000 | -0.02353910 | 0.00041237  | 0.00000000  |
|    |   | Z | 0.00000000  | -0.02710424 | 0.00000000  | -0.00000000 | -0.10173614 |
| 3  | C | X | 0.02025287  | 0.00000000  | 0.04339903  | 0.01067374  | 0.00000000  |
|    |   | Y | -0.03073248 | -0.00000000 | -0.04375435 | 0.00406540  | 0.00000000  |
|    |   | Z | -0.00000000 | -0.11511710 | 0.00000000  | 0.00000000  | 0.09993742  |
| 4  | C | X | 0.02996363  | -0.00000000 | -0.05401818 | 0.01272863  | 0.00000000  |
|    |   | Y | -0.04568763 | -0.00000000 | -0.12169056 | -0.00630053 | -0.00000000 |
|    |   | Z | -0.00000000 | -0.01028820 | -0.00000000 | -0.00000000 | -0.07748397 |
| 5  | C | X | 0.02053439  | -0.00000000 | -0.10727733 | 0.01448218  | 0.00000000  |
|    |   | Y | -0.01035519 | 0.00000000  | 0.03592325  | -0.01172580 | -0.00000000 |
|    |   | Z | 0.00000000  | 0.02085472  | -0.00000000 | 0.00000000  | 0.10814526  |
| 6  | C | X | -0.01620369 | -0.00000000 | -0.03469330 | -0.00789921 | -0.00000000 |
|    |   | Y | 0.00531764  | 0.00000000  | 0.04133602  | -0.00389183 | -0.00000000 |
|    |   | Z | -0.00000000 | -0.04190666 | 0.00000000  | -0.00000000 | -0.09647256 |
| 7  | C | X | 0.00345156  | 0.00000000  | 0.01500463  | 0.00546538  | 0.00000000  |
|    |   | Y | 0.05853281  | -0.00000000 | -0.00620933 | 0.02924025  | -0.00000000 |
|    |   | Z | 0.00000000  | 0.17090702  | -0.00000000 | -0.00000000 | -0.00343159 |
| 8  | C | X | -0.09222177 | -0.00000000 | 0.00870697  | -0.04104338 | 0.00000000  |
|    |   | Y | 0.00638881  | -0.00000000 | -0.02990586 | -0.05244911 | -0.00000000 |
|    |   | Z | 0.00000000  | 0.04459321  | -0.00000000 | -0.00000000 | -0.00387379 |
| 9  | C | X | -0.08458129 | 0.00000000  | -0.01200227 | -0.04323787 | 0.00000000  |
|    |   | Y | 0.00962650  | -0.00000000 | -0.00428404 | -0.00826366 | 0.00000000  |
|    |   | Z | -0.00000000 | -0.00936901 | 0.00000000  | 0.00000000  | -0.00063926 |
| 10 | O | X | 0.08487060  | -0.00000000 | -0.02014121 | 0.00019562  | -0.00000000 |
|    |   | Y | 0.04117168  | 0.00000000  | 0.00147076  | 0.03791796  | 0.00000000  |
|    |   | Z | -0.00000000 | -0.05474933 | 0.00000000  | 0.00000000  | 0.00311979  |

|    |   |   |             |             |             |             |             |
|----|---|---|-------------|-------------|-------------|-------------|-------------|
| 11 | C | X | -0.08926864 | 0.00000000  | -0.00334948 | 0.18453740  | -0.00000000 |
|    |   | Y | 0.01069409  | 0.00000000  | 0.01230497  | 0.12692141  | -0.00000000 |
|    |   | Z | 0.00000000  | -0.00685239 | 0.00000000  | 0.00000000  | 0.00008040  |
| 12 | N | X | 0.11305126  | -0.00000000 | 0.00307914  | -0.01683469 | 0.00000000  |
|    |   | Y | -0.06474566 | -0.00000000 | -0.00790938 | -0.09457464 | 0.00000000  |
|    |   | Z | 0.00000000  | 0.00541265  | 0.00000000  | -0.00000000 | -0.00016078 |
| 13 | N | X | 0.05182673  | -0.00000000 | -0.00203521 | -0.06866738 | 0.00000000  |
|    |   | Y | 0.06446126  | -0.00000000 | 0.00147739  | -0.01687438 | 0.00000000  |
|    |   | Z | 0.00000000  | -0.00159399 | 0.00000000  | -0.00000000 | 0.00002177  |
| 14 | H | X | -0.04589227 | -0.00000000 | 0.02322707  | -0.01718810 | -0.00000000 |
|    |   | Y | -0.07480553 | -0.00000000 | -0.09004722 | -0.00632822 | 0.00000000  |
|    |   | Z | 0.00000000  | 0.04947429  | -0.00000000 | -0.00000000 | -0.29221599 |
| 15 | H | X | 0.04853222  | 0.00000000  | -0.02287409 | 0.00392627  | -0.00000000 |
|    |   | Y | -0.05060778 | -0.00000000 | -0.13078893 | -0.00394708 | -0.00000000 |
|    |   | Z | 0.00000000  | 0.12254307  | -0.00000000 | -0.00000000 | -0.20152862 |
| 16 | H | X | 0.04732697  | 0.00000000  | -0.04447364 | 0.02207285  | 0.00000000  |
|    |   | Y | 0.01800185  | 0.00000000  | 0.10460905  | -0.00389097 | -0.00000000 |
|    |   | Z | 0.00000000  | 0.14118477  | -0.00000000 | -0.00000000 | -0.05001053 |
| 17 | H | X | -0.02266896 | -0.00000000 | 0.01105793  | -0.01201547 | -0.00000000 |
|    |   | Y | 0.02563981  | -0.00000000 | -0.10129420 | 0.00868758  | -0.00000000 |
|    |   | Z | 0.00000000  | -0.04582690 | -0.00000000 | -0.00000000 | -0.31272077 |
| 18 | H | X | -0.13681510 | -0.08428233 | 0.00875702  | -0.07234679 | 0.00682773  |
|    |   | Y | 0.02204913  | 0.31883249  | -0.02682809 | -0.03978980 | -0.02444142 |
|    |   | Z | -0.00334069 | -0.17857031 | -0.00194490 | -0.00332951 | 0.01310606  |
| 19 | H | X | -0.13681510 | 0.08428233  | 0.00875702  | -0.07234679 | -0.00682773 |
|    |   | Y | 0.02204913  | -0.31883249 | -0.02682809 | -0.03978980 | 0.02444142  |
|    |   | Z | 0.00334069  | -0.17857031 | 0.00194490  | 0.00332951  | 0.01310606  |
| 20 | H | X | -0.11286645 | 0.04621965  | -0.03156302 | -0.11913663 | -0.00449520 |
|    |   | Y | 0.01116673  | 0.06112085  | -0.00149607 | 0.01677892  | -0.00889637 |
|    |   | Z | 0.00018261  | -0.05831848 | 0.00005778  | -0.00887206 | 0.00637757  |
| 21 | H | X | -0.11286645 | -0.04621965 | -0.03156302 | -0.11913663 | 0.00449520  |
|    |   | Y | 0.01116673  | -0.06112085 | -0.00149607 | 0.01677892  | 0.00889637  |
|    |   | Z | -0.00018261 | -0.05831848 | -0.00005778 | 0.00887206  | 0.00637757  |
| 22 | H | X | -0.08214919 | 0.00544977  | -0.00973556 | 0.09558532  | 0.00123872  |
|    |   | Y | 0.01798661  | -0.00223982 | 0.01083580  | 0.08006200  | -0.00254344 |
|    |   | Z | -0.00139412 | -0.00551158 | 0.00101804  | 0.02601924  | 0.00191458  |
| 23 | H | X | -0.08214919 | -0.00544977 | -0.00973556 | 0.09558532  | -0.00123872 |
|    |   | Y | 0.01798661  | 0.00223982  | 0.01083580  | 0.08006200  | 0.00254344  |
|    |   | Z | 0.00139412  | -0.00551158 | -0.00101804 | -0.02601924 | 0.00191458  |

|                |       |             |             |            |             |             |
|----------------|-------|-------------|-------------|------------|-------------|-------------|
| TRANS. SAYVETZ | X     | 0.00264887  | 0.00000000  | 0.00144398 | -0.00016109 | -0.00000000 |
|                | Y     | -0.00360239 | -0.00000000 | 0.00019414 | 0.00364223  | -0.00000000 |
|                | Z     | 0.00000000  | -0.00236274 | 0.00000000 | -0.00000000 | 0.00144749  |
|                | TOTAL | 0.00447144  | 0.00236274  | 0.00145697 | 0.00364579  | 0.00144749  |

|              |       |             |             |             |             |             |
|--------------|-------|-------------|-------------|-------------|-------------|-------------|
| ROT. SAYVETZ | X     | -0.00000000 | -0.02225513 | -0.00000000 | 0.00000000  | 0.00579417  |
|              | Y     | -0.00000000 | -0.00346880 | -0.00000000 | 0.00000000  | 0.02489066  |
|              | Z     | -0.02836743 | -0.00000000 | -0.00129311 | -0.00241346 | -0.00000000 |
|              | TOTAL | 0.02836743  | 0.02252384  | 0.00129311  | 0.00241346  | 0.02555616  |

|               |  |         |         |         |         |         |
|---------------|--|---------|---------|---------|---------|---------|
|               |  | 26      | 27      | 28      | 29      | 30      |
| FREQUENCY:    |  | 701.02  | 770.76  | 812.38  | 817.31  | 890.75  |
| SYMMETRY:     |  | A'      | A''     | A''     | A'      | A''     |
| REDUCED MASS: |  | 6.84888 | 1.14308 | 1.32442 | 5.92467 | 1.46557 |

|   |   |   |             |             |            |             |             |
|---|---|---|-------------|-------------|------------|-------------|-------------|
| 1 | N | X | -0.02443447 | -0.00000000 | 0.00000000 | 0.01862315  | 0.00000000  |
|   |   | Y | 0.03992354  | -0.00000000 | 0.00000000 | 0.07868830  | 0.00000000  |
|   |   | Z | -0.00000000 | 0.01063920  | 0.03259318 | -0.00000000 | 0.00031040  |
| 2 | C | X | -0.03312311 | 0.00000000  | 0.00000000 | -0.00101510 | -0.00000000 |
|   |   | Y | 0.10303896  | -0.00000000 | 0.00000000 | 0.07065971  | 0.00000000  |



|    |   |   |             |             |             |             |             |
|----|---|---|-------------|-------------|-------------|-------------|-------------|
| 3  | C | Z | 0.00000000  | -0.01701059 | -0.04589929 | 0.00000000  | -0.02836693 |
|    |   | X | 0.08893272  | -0.00000000 | 0.00000000  | 0.02126645  | 0.00000000  |
|    |   | Y | 0.04798613  | -0.00000000 | 0.00000000  | 0.01247650  | 0.00000000  |
| 4  | C | Z | -0.00000000 | -0.00580777 | 0.07413491  | -0.00000000 | -0.03901830 |
|    |   | X | 0.04411540  | -0.00000000 | 0.00000000  | 0.04407770  | 0.00000000  |
|    |   | Y | -0.02136366 | 0.00000000  | -0.00000000 | -0.04131161 | -0.00000000 |
| 5  | C | Z | 0.00000000  | -0.01701710 | -0.07370229 | 0.00000000  | 0.01472970  |
|    |   | X | 0.05099417  | -0.00000000 | 0.00000000  | 0.06031889  | 0.00000000  |
|    |   | Y | -0.08821559 | 0.00000000  | -0.00000000 | -0.07331387 | -0.00000000 |
| 6  | C | Z | -0.00000000 | -0.00761237 | -0.04615525 | 0.00000000  | 0.02429758  |
|    |   | X | -0.08620494 | 0.00000000  | -0.00000000 | -0.05388554 | -0.00000000 |
|    |   | Y | -0.04691029 | 0.00000000  | -0.00000000 | -0.02608552 | -0.00000000 |
| 7  | C | Z | 0.00000000  | -0.01388571 | -0.06067268 | 0.00000000  | 0.01157643  |
|    |   | X | 0.08453138  | 0.00000000  | -0.00000000 | -0.05713632 | -0.00000000 |
|    |   | Y | -0.00634013 | 0.00000000  | -0.00000000 | -0.05035077 | -0.00000000 |
| 8  | C | Z | 0.00000000  | 0.05420788  | -0.00937829 | -0.00000000 | 0.10195507  |
|    |   | X | 0.05361716  | 0.00000000  | -0.00000000 | -0.09408206 | -0.00000000 |
|    |   | Y | -0.08507962 | -0.00000000 | 0.00000000  | 0.12580676  | 0.00000000  |
| 9  | C | Z | -0.00000000 | -0.02122316 | -0.02508449 | 0.00000000  | -0.08258283 |
|    |   | X | -0.01842564 | -0.00000000 | -0.00000000 | -0.00536545 | 0.00000000  |
|    |   | Y | -0.01694875 | 0.00000000  | 0.00000000  | 0.02649334  | 0.00000000  |
| 10 | O | Z | -0.00000000 | -0.05762915 | 0.01290428  | -0.00000000 | -0.02119542 |
|    |   | X | -0.06922128 | 0.00000000  | 0.00000000  | 0.00716888  | 0.00000000  |
|    |   | Y | 0.04087406  | 0.00000000  | -0.00000000 | -0.09218397 | -0.00000000 |
| 11 | C | Z | -0.00000000 | -0.01290063 | 0.00223240  | 0.00000000  | -0.02204238 |
|    |   | X | -0.05954950 | 0.00000000  | 0.00000000  | 0.04919098  | 0.00000000  |
|    |   | Y | 0.01002351  | 0.00000000  | -0.00000000 | -0.02489925 | -0.00000000 |
| 12 | N | Z | 0.00000000  | -0.04806205 | 0.02524051  | -0.00000000 | 0.07712531  |
|    |   | X | 0.00899510  | -0.00000000 | -0.00000000 | -0.00083593 | -0.00000000 |
|    |   | Y | 0.00377569  | -0.00000000 | 0.00000000  | -0.00242107 | -0.00000000 |
| 13 | N | Z | 0.00000000  | 0.02064302  | -0.00976830 | 0.00000000  | -0.02666101 |
|    |   | X | 0.00961256  | -0.00000000 | -0.00000000 | -0.00178476 | -0.00000000 |
|    |   | Y | 0.00642982  | 0.00000000  | -0.00000000 | -0.00157182 | 0.00000000  |
| 14 | H | Z | 0.00000000  | -0.00377342 | 0.00188968  | -0.00000000 | 0.00507601  |
|    |   | X | -0.05401280 | -0.00000000 | -0.00000000 | -0.01453228 | -0.00000000 |
|    |   | Y | 0.08494693  | -0.00000000 | 0.00000000  | 0.06169656  | 0.00000000  |
| 15 | H | Z | 0.00000000  | 0.07570459  | 0.21244404  | -0.00000000 | 0.15690269  |
|    |   | X | -0.08394997 | 0.00000000  | -0.00000000 | -0.00743979 | -0.00000000 |
|    |   | Y | 0.01351165  | 0.00000000  | -0.00000000 | -0.02950574 | -0.00000000 |
| 16 | H | Z | 0.00000000  | 0.10309235  | 0.39579158  | -0.00000000 | -0.05932048 |
|    |   | X | 0.10417990  | -0.00000000 | 0.00000000  | 0.12521441  | 0.00000000  |
|    |   | Y | -0.03190815 | -0.00000000 | 0.00000000  | -0.00690465 | -0.00000000 |
| 17 | H | Z | 0.00000000  | 0.12912945  | 0.57853736  | -0.00000000 | -0.20311476 |
|    |   | X | -0.09087214 | 0.00000000  | -0.00000000 | -0.04844320 | -0.00000000 |
|    |   | Y | -0.03690043 | 0.00000000  | -0.00000000 | -0.04448240 | -0.00000000 |
| 18 | H | Z | 0.00000000  | 0.07395608  | 0.34961664  | -0.00000000 | -0.05511400 |
|    |   | X | 0.03900428  | -0.12736221 | 0.01746827  | -0.10991500 | -0.18445804 |
|    |   | Y | -0.07459144 | -0.13698832 | -0.07494866 | 0.11741496  | -0.25148759 |
| 19 | H | Z | -0.00493695 | 0.10165132  | 0.02818545  | 0.00887062  | 0.13510118  |
|    |   | X | 0.03900428  | 0.12736221  | -0.01746827 | -0.10991500 | 0.18445804  |
|    |   | Y | -0.07459144 | 0.13698832  | 0.07494866  | 0.11741496  | 0.25148759  |
| 20 | H | Z | 0.00493695  | 0.10165132  | 0.02818545  | -0.00887062 | 0.13510118  |
|    |   | X | -0.06961401 | -0.02604262 | -0.04734320 | 0.06627846  | -0.27285543 |
|    |   | Y | -0.01334765 | -0.40606623 | 0.08158679  | 0.02164326  | -0.03680086 |
| 21 | H | Z | 0.00265823  | 0.24339139  | -0.04193595 | -0.00360171 | 0.03595791  |
|    |   | X | -0.06961401 | 0.02604262  | 0.04734320  | 0.06627846  | 0.27285543  |
|    |   | Y | -0.01334765 | 0.40606623  | -0.08158679 | 0.02164326  | 0.03680086  |
| 22 | H | Z | -0.00265823 | 0.24339139  | -0.04193595 | 0.00360171  | 0.03595791  |
|    |   | X | -0.06080048 | 0.12680759  | -0.04718941 | 0.06636963  | -0.09219488 |
|    |   | Y | 0.01805138  | -0.31145750 | 0.11957756  | -0.03250722 | 0.27589499  |

|    |   |   |             |             |             |             |             |
|----|---|---|-------------|-------------|-------------|-------------|-------------|
| 23 | H | Z | -0.00390597 | 0.17218175  | -0.05914333 | 0.00375806  | -0.11686942 |
|    |   | X | -0.06080048 | -0.12680759 | 0.04718941  | 0.06636963  | 0.09219488  |
|    |   | Y | 0.01805138  | 0.31145750  | -0.11957756 | -0.03250722 | -0.27589499 |
|    |   | Z | 0.00390597  | 0.17218175  | -0.05914333 | -0.00375806 | -0.11686942 |

|        |         |   |             |             |             |             |             |
|--------|---------|---|-------------|-------------|-------------|-------------|-------------|
| TRANS. | SAYVETZ | X | -0.00001098 | -0.00000000 | 0.00000000  | 0.00023376  | -0.00000000 |
|        |         | Y | -0.00096303 | 0.00000000  | -0.00000000 | 0.00061742  | 0.00000000  |
|        |         | Z | 0.00000000  | -0.00220271 | -0.00008077 | -0.00000000 | -0.00090438 |
|        | TOTAL   |   | 0.00096309  | 0.00220271  | 0.00008077  | 0.00066019  | 0.00090438  |

|      |         |   |             |             |             |             |             |
|------|---------|---|-------------|-------------|-------------|-------------|-------------|
| ROT. | SAYVETZ | X | -0.00000000 | -0.00337696 | -0.01371867 | -0.00000000 | -0.00037034 |
|      |         | Y | 0.00000000  | -0.00378156 | -0.02727038 | -0.00000000 | 0.00544515  |
|      |         | Z | -0.00647358 | 0.00000000  | 0.00000000  | 0.00102483  | -0.00000000 |
|      | TOTAL   |   | 0.00647358  | 0.00506992  | 0.03052664  | 0.00102483  | 0.00545773  |

|               |  |         |         |         |         |         |
|---------------|--|---------|---------|---------|---------|---------|
|               |  | 31      | 32      | 33      | 34      | 35      |
| FREQUENCY:    |  | 926.21  | 973.78  | 991.52  | 1017.24 | 1054.19 |
| SYMMETRY:     |  | A''     | A''     | A''     | A'      | A'      |
| REDUCED MASS: |  | 1.28199 | 1.27787 | 1.40859 | 5.31232 | 4.42998 |

|    |   |   |             |             |             |             |             |
|----|---|---|-------------|-------------|-------------|-------------|-------------|
| 1  | N | X | -0.00000000 | 0.00000000  | 0.00000000  | -0.01922401 | -0.00011629 |
|    |   | Y | 0.00000000  | 0.00000000  | 0.00000000  | -0.07995664 | 0.07315163  |
|    |   | Z | 0.00902363  | -0.01907400 | 0.00808053  | 0.00000000  | 0.00000000  |
| 2  | C | X | 0.00000000  | -0.00000000 | 0.00000000  | 0.00187391  | 0.06781777  |
|    |   | Y | -0.00000000 | 0.00000000  | -0.00000000 | 0.02847642  | -0.12463672 |
|    |   | Z | -0.11767396 | 0.04883190  | 0.05630211  | 0.00000000  | -0.00000000 |
| 3  | C | X | 0.00000000  | -0.00000000 | -0.00000000 | 0.09318255  | -0.00051428 |
|    |   | Y | -0.00000000 | -0.00000000 | -0.00000000 | 0.00525839  | -0.01667004 |
|    |   | Z | 0.02335441  | -0.00447204 | -0.02432570 | 0.00000000  | -0.00000000 |
| 4  | C | X | -0.00000000 | 0.00000000  | 0.00000000  | -0.01480425 | 0.01765596  |
|    |   | Y | 0.00000000  | -0.00000000 | 0.00000000  | 0.01387878  | 0.16482844  |
|    |   | Z | 0.02253978  | -0.10342702 | 0.04208095  | 0.00000000  | -0.00000000 |
| 5  | C | X | 0.00000000  | 0.00000000  | 0.00000000  | -0.07797623 | 0.01230418  |
|    |   | Y | -0.00000000 | -0.00000000 | -0.00000000 | 0.07745945  | -0.03632845 |
|    |   | Z | 0.04886340  | 0.07523400  | 0.04381933  | 0.00000000  | -0.00000000 |
| 6  | C | X | 0.00000000  | -0.00000000 | -0.00000000 | 0.00828573  | -0.08670576 |
|    |   | Y | 0.00000000  | 0.00000000  | -0.00000000 | -0.00815406 | -0.04600112 |
|    |   | Z | -0.01883075 | -0.00059211 | -0.13521069 | -0.00000000 | 0.00000000  |
| 7  | C | X | -0.00000000 | 0.00000000  | -0.00000000 | 0.14344831  | 0.02825900  |
|    |   | Y | 0.00000000  | 0.00000000  | 0.00000000  | -0.06919630 | -0.01388622 |
|    |   | Z | -0.02787350 | -0.00506883 | 0.00510766  | -0.00000000 | 0.00000000  |
| 8  | C | X | -0.00000000 | -0.00000000 | 0.00000000  | -0.00090708 | 0.01093835  |
|    |   | Y | -0.00000000 | -0.00000000 | -0.00000000 | 0.10057745  | 0.02873772  |
|    |   | Z | 0.01719355  | -0.00068237 | -0.00038994 | 0.00000000  | -0.00000000 |
| 9  | C | X | -0.00000000 | 0.00000000  | 0.00000000  | -0.05490599 | 0.00471083  |
|    |   | Y | 0.00000000  | 0.00000000  | -0.00000000 | -0.03506662 | -0.04116916 |
|    |   | Z | 0.01167959  | 0.00154044  | -0.00461913 | -0.00000000 | 0.00000000  |
| 10 | O | X | -0.00000000 | -0.00000000 | 0.00000000  | -0.03393910 | -0.00546276 |
|    |   | Y | 0.00000000  | 0.00000000  | 0.00000000  | -0.03740633 | -0.00633484 |
|    |   | Z | 0.00501852  | 0.00031772  | -0.00036663 | -0.00000000 | -0.00000000 |
| 11 | C | X | 0.00000000  | -0.00000000 | 0.00000000  | 0.00652120  | -0.01227416 |
|    |   | Y | -0.00000000 | -0.00000000 | 0.00000000  | 0.01200724  | 0.03161647  |
|    |   | Z | -0.02034583 | -0.00190919 | 0.00455766  | 0.00000000  | -0.00000000 |
| 12 | N | X | 0.00000000  | 0.00000000  | -0.00000000 | 0.00649126  | 0.00276966  |
|    |   | Y | -0.00000000 | -0.00000000 | 0.00000000  | -0.00998265 | -0.00589371 |
|    |   | Z | 0.00697469  | 0.00057756  | -0.00155155 | -0.00000000 | -0.00000000 |
| 13 | N | X | -0.00000000 | -0.00000000 | 0.00000000  | 0.00024007  | -0.00145410 |
|    |   | Y | 0.00000000  | 0.00000000  | -0.00000000 | 0.00265999  | 0.00115635  |
|    |   | Z | -0.00127852 | -0.00010237 | 0.00026638  | -0.00000000 | -0.00000000 |
| 14 | H | X | -0.00000000 | -0.00000000 | -0.00000000 | 0.00431971  | -0.05550348 |

|    |   |   |             |             |             |             |             |
|----|---|---|-------------|-------------|-------------|-------------|-------------|
|    |   | Y | -0.00000000 | -0.00000000 | -0.00000000 | 0.02798287  | -0.24314234 |
|    |   | Z | 0.72863252  | -0.14903140 | -0.26104400 | -0.00000000 | 0.00000000  |
| 15 | H | X | -0.00000000 | 0.00000000  | 0.00000000  | -0.02100659 | -0.04787978 |
|    |   | Y | 0.00000000  | -0.00000000 | 0.00000000  | 0.01982328  | 0.19245832  |
|    |   | Z | -0.06021867 | 0.70344487  | -0.26267600 | 0.00000000  | 0.00000000  |
| 16 | H | X | -0.00000000 | -0.00000000 | -0.00000000 | -0.09803897 | -0.08170908 |
|    |   | Y | -0.00000000 | -0.00000000 | -0.00000000 | 0.06559240  | -0.13197772 |
|    |   | Z | -0.37941123 | -0.48995920 | -0.14827457 | -0.00000000 | 0.00000000  |
| 17 | H | X | -0.00000000 | 0.00000000  | -0.00000000 | 0.01516382  | -0.07285496 |
|    |   | Y | 0.00000000  | -0.00000000 | 0.00000000  | -0.03652849 | -0.10743298 |
|    |   | Z | 0.20396507  | 0.07518605  | 0.72321768  | 0.00000000  | -0.00000000 |
| 18 | H | X | 0.05120078  | 0.01364544  | -0.01381718 | -0.15322288 | -0.04722928 |
|    |   | Y | 0.05865332  | -0.00408343 | -0.00387496 | 0.13683050  | 0.04144738  |
|    |   | Z | -0.03437333 | 0.00007644  | 0.00461667  | 0.00109164  | 0.00045242  |
| 19 | H | X | -0.05120078 | -0.01364544 | 0.01381718  | -0.15322288 | -0.04722928 |
|    |   | Y | -0.05865332 | 0.00408343  | 0.00387496  | 0.13683050  | 0.04144738  |
|    |   | Z | -0.03437333 | 0.00007644  | 0.00461667  | -0.00109164 | -0.00045242 |
| 20 | H | X | 0.07889354  | 0.00732236  | -0.01832367 | -0.08200849 | -0.01470526 |
|    |   | Y | 0.02797483  | 0.00401814  | -0.01133505 | -0.02113159 | -0.03443999 |
|    |   | Z | -0.01756448 | -0.00226966 | 0.00572912  | -0.00738694 | -0.00368774 |
| 21 | H | X | -0.07889354 | -0.00732236 | 0.01832367  | -0.08200849 | -0.01470526 |
|    |   | Y | -0.02797483 | -0.00401814 | 0.01133505  | -0.02113159 | -0.03443999 |
|    |   | Z | -0.01756448 | -0.00226966 | 0.00572912  | 0.00738694  | 0.00368774  |
| 22 | H | X | 0.01868364  | 0.00155349  | -0.00207217 | 0.01813551  | -0.02494736 |
|    |   | Y | -0.06790441 | -0.00572726 | 0.01380139  | 0.00318253  | 0.03173682  |
|    |   | Z | 0.02727830  | 0.00209994  | -0.00507095 | 0.00575482  | 0.00104328  |
| 23 | H | X | -0.01868364 | -0.00155349 | 0.00207217  | 0.01813551  | -0.02494736 |
|    |   | Y | 0.06790441  | 0.00572726  | -0.01380139 | 0.00318253  | 0.03173682  |
|    |   | Z | 0.02727830  | 0.00209994  | -0.00507095 | -0.00575482 | -0.00104328 |

|                |       |            |             |             |             |             |
|----------------|-------|------------|-------------|-------------|-------------|-------------|
| TRANS. SAYVETZ | X     | 0.00000000 | 0.00000000  | 0.00000000  | 0.00089885  | 0.00063043  |
|                | Y     | 0.00000000 | 0.00000000  | 0.00000000  | -0.00050494 | 0.00030580  |
|                | Z     | 0.00039380 | -0.00135622 | -0.00058516 | -0.00000000 | -0.00000000 |
|                | TOTAL | 0.00039380 | 0.00135622  | 0.00058516  | 0.00103097  | 0.00070068  |

|              |       |             |             |             |             |             |
|--------------|-------|-------------|-------------|-------------|-------------|-------------|
| ROT. SAYVETZ | X     | 0.00733765  | -0.01023241 | 0.00024848  | -0.00000000 | -0.00000000 |
|              | Y     | 0.00264115  | -0.01069416 | -0.00305103 | 0.00000000  | 0.00000000  |
|              | Z     | -0.00000000 | -0.00000000 | -0.00000000 | 0.00611100  | -0.00028908 |
|              | TOTAL | 0.00779851  | 0.01480092  | 0.00306113  | 0.00611100  | 0.00028908  |

|               | 36      | 37      | 38      | 39      | 40      |
|---------------|---------|---------|---------|---------|---------|
| FREQUENCY:    | 1060.24 | 1088.02 | 1109.75 | 1110.40 | 1165.89 |
| SYMMETRY:     | A'      | A'      | A'      | A''     | A'      |
| REDUCED MASS: | 3.12976 | 2.61184 | 3.18573 | 1.73706 | 1.44124 |

|   |   |   |             |             |             |             |             |
|---|---|---|-------------|-------------|-------------|-------------|-------------|
| 1 | N | X | 0.00234573  | -0.02303695 | -0.01836116 | -0.00000000 | 0.03637278  |
|   |   | Y | -0.00005606 | 0.07553048  | 0.00613035  | 0.00000000  | 0.04321530  |
|   |   | Z | 0.00000000  | -0.00000000 | 0.00000000  | -0.00216621 | -0.00000000 |
| 2 | C | X | -0.01929874 | -0.05902798 | -0.00271352 | -0.00000000 | -0.08807379 |
|   |   | Y | 0.02303240  | -0.01023126 | -0.02685486 | -0.00000000 | 0.03205285  |
|   |   | Z | -0.00000000 | 0.00000000  | 0.00000000  | -0.00316685 | -0.00000000 |
| 3 | C | X | -0.00539309 | -0.00970988 | 0.06037204  | 0.00000000  | -0.02541367 |
|   |   | Y | -0.00100523 | -0.01223573 | 0.00924748  | 0.00000000  | -0.02326146 |
|   |   | Z | 0.00000000  | -0.00000000 | -0.00000000 | 0.02570178  | 0.00000000  |
| 4 | C | X | -0.00699254 | -0.05820071 | -0.01672206 | -0.00000000 | 0.08067037  |
|   |   | Y | -0.02657926 | -0.02425344 | 0.02213150  | 0.00000000  | 0.01757382  |
|   |   | Z | -0.00000000 | -0.00000000 | 0.00000000  | -0.00313191 | 0.00000000  |
| 5 | C | X | -0.00008055 | 0.03234012  | -0.01485517 | -0.00000000 | -0.06804623 |
|   |   | Y | -0.00275787 | -0.09009613 | -0.01381622 | -0.00000000 | -0.00772008 |
|   |   | Z | -0.00000000 | -0.00000000 | 0.00000000  | -0.00237645 | -0.00000000 |

|                |   |   |             |             |             |             |             |
|----------------|---|---|-------------|-------------|-------------|-------------|-------------|
| 6              | C | X | 0.02916445  | 0.13242978  | 0.03368544  | 0.00000000  | 0.02042697  |
|                |   | Y | 0.00969502  | 0.06381711  | 0.01776185  | 0.00000000  | -0.03088772 |
|                |   | Z | 0.00000000  | 0.00000000  | -0.00000000 | 0.00130835  | 0.00000000  |
| 7              | C | X | 0.00324543  | 0.03402323  | 0.06361108  | 0.00000000  | 0.01646152  |
|                |   | Y | -0.00502499 | -0.01195608 | -0.01784344 | -0.00000000 | -0.00171131 |
|                |   | Z | -0.00000000 | 0.00000000  | 0.00000000  | -0.10310881 | -0.00000000 |
| 8              | C | X | -0.05304160 | 0.04847504  | -0.11370933 | -0.00000000 | 0.00488316  |
|                |   | Y | -0.00733027 | 0.04854063  | -0.08976099 | -0.00000000 | -0.00553609 |
|                |   | Z | 0.00000000  | -0.00000000 | -0.00000000 | 0.10925733  | 0.00000000  |
| 9              | C | X | 0.15803692  | -0.04713568 | 0.06611758  | 0.00000000  | -0.00200088 |
|                |   | Y | -0.09865988 | -0.03866797 | 0.13739910  | 0.00000000  | 0.01008640  |
|                |   | Z | -0.00000000 | 0.00000000  | 0.00000000  | -0.09423340 | -0.00000000 |
| 10             | O | X | -0.00413502 | -0.00071394 | -0.01689780 | -0.00000000 | 0.00257098  |
|                |   | Y | -0.01694006 | -0.00462202 | 0.00987159  | 0.00000000  | 0.01264068  |
|                |   | Z | 0.00000000  | -0.00000000 | -0.00000000 | 0.01806206  | -0.00000000 |
| 11             | C | X | -0.06307606 | -0.00033309 | 0.02270505  | 0.00000000  | 0.00282005  |
|                |   | Y | 0.12981224  | 0.00921383  | -0.06640848 | -0.00000000 | -0.00802208 |
|                |   | Z | 0.00000000  | -0.00000000 | -0.00000000 | 0.07061488  | 0.00000000  |
| 12             | N | X | 0.00137835  | 0.00441295  | -0.01122504 | -0.00000000 | -0.00069647 |
|                |   | Y | -0.00948673 | -0.00656147 | 0.01920641  | 0.00000000  | 0.00151184  |
|                |   | Z | -0.00000000 | 0.00000000  | 0.00000000  | -0.02256453 | -0.00000000 |
| 13             | N | X | -0.00739753 | 0.00037815  | 0.00151728  | 0.00000000  | 0.00039802  |
|                |   | Y | 0.00124165  | 0.00174528  | -0.00445118 | -0.00000000 | -0.00020693 |
|                |   | Z | -0.00000000 | -0.00000000 | -0.00000000 | 0.00376765  | 0.00000000  |
| 14             | H | X | -0.01910265 | -0.14359153 | -0.10754190 | -0.00000000 | -0.11072066 |
|                |   | Y | 0.02603827  | -0.08420756 | -0.12263839 | -0.00000000 | 0.01560215  |
|                |   | Z | 0.00000000  | -0.00000000 | -0.00000000 | 0.02908432  | 0.00000000  |
| 15             | H | X | -0.00141232 | -0.27158169 | -0.15150770 | -0.00000000 | 0.61409282  |
|                |   | Y | -0.02998039 | 0.03121063  | 0.06218580  | 0.00000000  | -0.12653898 |
|                |   | Z | -0.00000000 | 0.00000000  | -0.00000000 | 0.02693315  | -0.00000000 |
| 16             | H | X | -0.00871514 | -0.18316884 | -0.12621405 | -0.00000000 | -0.34418705 |
|                |   | Y | -0.01429899 | -0.33873109 | -0.13481617 | -0.00000000 | -0.29907323 |
|                |   | Z | 0.00000000  | 0.00000000  | 0.00000000  | 0.00022083  | 0.00000000  |
| 17             | H | X | 0.02732791  | 0.09415894  | 0.02161532  | 0.00000000  | 0.08000143  |
|                |   | Y | 0.02164230  | 0.21414250  | 0.06060456  | 0.00000000  | -0.21107440 |
|                |   | Z | -0.00000000 | -0.00000000 | -0.00000000 | 0.00734992  | -0.00000000 |
| 18             | H | X | -0.20179495 | 0.02267030  | -0.21007982 | -0.25805467 | -0.02976669 |
|                |   | Y | 0.01209066  | 0.05299136  | -0.05737318 | 0.28454282  | 0.00044246  |
|                |   | Z | 0.00636039  | 0.00243669  | -0.01093917 | -0.06357250 | 0.00063299  |
| 19             | H | X | -0.20179495 | 0.02267030  | -0.21007982 | 0.25805467  | -0.02976669 |
|                |   | Y | 0.01209066  | 0.05299136  | -0.05737318 | -0.28454282 | 0.00044246  |
|                |   | Z | -0.00636039 | -0.00243669 | 0.01093917  | -0.06357250 | -0.00063299 |
| 20             | H | X | 0.16944347  | -0.08368771 | 0.11886771  | -0.15616561 | -0.01549436 |
|                |   | Y | -0.09682175 | -0.02892654 | 0.12297970  | -0.21894836 | 0.01165013  |
|                |   | Z | -0.00494346 | -0.00405465 | 0.00913866  | 0.08384202  | 0.00088894  |
| 21             | H | X | 0.16944347  | -0.08368771 | 0.11886771  | 0.15616561  | -0.01549436 |
|                |   | Y | -0.09682175 | -0.02892654 | 0.12297970  | 0.21894836  | 0.01165013  |
|                |   | Z | 0.00494346  | 0.00405465  | -0.00913866 | 0.08384202  | -0.00088894 |
| 22             | H | X | -0.16145131 | 0.01187876  | 0.01565143  | 0.02618542  | 0.00142404  |
|                |   | Y | 0.14875953  | 0.00223606  | -0.05414815 | 0.18276317  | -0.00756584 |
|                |   | Z | -0.00729761 | 0.00470842  | -0.01042928 | -0.05476165 | -0.00074885 |
| 23             | H | X | -0.16145131 | 0.01187876  | 0.01565143  | -0.02618542 | 0.00142404  |
|                |   | Y | 0.14875953  | 0.00223606  | -0.05414815 | -0.18276317 | -0.00756584 |
|                |   | Z | 0.00729761  | -0.00470842 | 0.01042928  | -0.05476165 | 0.00074885  |
| TRANS. SAYVETZ |   | X | 0.00063621  | 0.00023782  | -0.00023401 | -0.00000000 | -0.00029806 |
|                |   | Y | -0.00052363 | -0.00010182 | 0.00000682  | 0.00000000  | -0.00032210 |
|                |   | Z | 0.00000000  | 0.00000000  | -0.00000000 | 0.00029418  | -0.00000000 |
| TOTAL          |   |   | 0.00082399  | 0.00025870  | 0.00023411  | 0.00029418  | 0.00043885  |

|              |       |             |             |             |             |             |
|--------------|-------|-------------|-------------|-------------|-------------|-------------|
| ROT. SAYVETZ | X     | 0.00000000  | 0.00000000  | 0.00000000  | -0.00312644 | -0.00000000 |
|              | Y     | 0.00000000  | 0.00000000  | 0.00000000  | -0.00392782 | 0.00000000  |
|              | Z     | -0.00869969 | -0.00060099 | -0.00483565 | 0.00000000  | -0.00269383 |
|              | TOTAL | 0.00869969  | 0.00060099  | 0.00483565  | 0.00502020  | 0.00269383  |

|               |  |         |         |         |         |         |
|---------------|--|---------|---------|---------|---------|---------|
|               |  | 41      | 42      | 43      | 44      | 45      |
| FREQUENCY:    |  | 1236.84 | 1242.65 | 1280.03 | 1287.21 | 1322.84 |
| SYMMETRY:     |  | A''     | A'      | A'      | A'      | A''     |
| REDUCED MASS: |  | 1.22176 | 2.19646 | 1.81483 | 2.36523 | 1.14692 |

|    |   |   |             |             |             |             |             |
|----|---|---|-------------|-------------|-------------|-------------|-------------|
| 1  | N | X | 0.00000000  | 0.03750120  | -0.06041919 | -0.10435870 | 0.00000000  |
|    |   | Y | -0.00000000 | -0.06383990 | 0.00147522  | 0.01778094  | 0.00000000  |
|    |   | Z | 0.00065280  | 0.00000000  | -0.00000000 | 0.00000000  | -0.00032979 |
| 2  | C | X | 0.00000000  | 0.03748165  | 0.01318626  | 0.12796738  | -0.00000000 |
|    |   | Y | -0.00000000 | -0.03924341 | 0.03141354  | 0.06628414  | -0.00000000 |
|    |   | Z | -0.00066865 | -0.00000000 | 0.00000000  | -0.00000000 | 0.00052133  |
| 3  | C | X | 0.00000000  | 0.04620038  | 0.12602555  | -0.01480399 | -0.00000000 |
|    |   | Y | 0.00000000  | 0.08595288  | -0.01920606 | -0.07875222 | -0.00000000 |
|    |   | Z | -0.00718814 | 0.00000000  | 0.00000000  | -0.00000000 | 0.00343680  |
| 4  | C | X | 0.00000000  | 0.05834033  | -0.00041007 | -0.07019617 | -0.00000000 |
|    |   | Y | -0.00000000 | -0.01938076 | 0.01369962  | 0.00302664  | 0.00000000  |
|    |   | Z | 0.00049339  | -0.00000000 | -0.00000000 | -0.00000000 | -0.00015836 |
| 5  | C | X | -0.00000000 | -0.05561801 | -0.01077692 | 0.05494244  | 0.00000000  |
|    |   | Y | -0.00000000 | -0.05717920 | 0.04703641  | 0.02124418  | -0.00000000 |
|    |   | Z | 0.00070202  | 0.00000000  | -0.00000000 | -0.00000000 | -0.00034880 |
| 6  | C | X | -0.00000000 | -0.07583379 | 0.03577823  | -0.00456801 | -0.00000000 |
|    |   | Y | 0.00000000  | 0.11037130  | -0.04704646 | -0.05409599 | 0.00000000  |
|    |   | Z | 0.00027608  | 0.00000000  | 0.00000000  | -0.00000000 | -0.00018259 |
| 7  | C | X | -0.00000000 | -0.02935666 | -0.06783235 | 0.00868454  | 0.00000000  |
|    |   | Y | 0.00000000  | 0.00366217  | 0.01765417  | 0.00096271  | -0.00000000 |
|    |   | Z | 0.03538669  | -0.00000000 | -0.00000000 | -0.00000000 | -0.01858445 |
| 8  | C | X | -0.00000000 | -0.01512028 | -0.05946635 | 0.00177963  | -0.00000000 |
|    |   | Y | 0.00000000  | 0.00856715  | 0.00962640  | -0.00788336 | -0.00000000 |
|    |   | Z | -0.00377409 | 0.00000000  | 0.00000000  | 0.00000000  | -0.01770531 |
| 9  | C | X | -0.00000000 | -0.00579932 | -0.03799491 | 0.00780959  | -0.00000000 |
|    |   | Y | -0.00000000 | -0.01397092 | -0.02187655 | 0.00663836  | 0.00000000  |
|    |   | Z | -0.05575553 | 0.00000000  | 0.00000000  | -0.00000000 | 0.08956639  |
| 10 | O | X | -0.00000000 | -0.00936451 | 0.00379748  | 0.00573385  | -0.00000000 |
|    |   | Y | -0.00000000 | -0.01837522 | -0.00231800 | 0.00642131  | 0.00000000  |
|    |   | Z | -0.00468873 | 0.00000000  | 0.00000000  | -0.00000000 | 0.00166823  |
| 11 | C | X | -0.00000000 | -0.00586521 | -0.02384260 | 0.00427098  | -0.00000000 |
|    |   | Y | 0.00000000  | 0.01307220  | 0.03796950  | -0.00656115 | 0.00000000  |
|    |   | Z | 0.09160101  | -0.00000000 | -0.00000000 | -0.00000000 | -0.01964276 |
| 12 | N | X | 0.00000000  | 0.00157382  | 0.00448374  | -0.00092086 | 0.00000000  |
|    |   | Y | -0.00000000 | -0.00337692 | -0.01203207 | 0.00226076  | -0.00000000 |
|    |   | Z | -0.05049698 | 0.00000000  | 0.00000000  | 0.00000000  | -0.04026402 |
| 13 | N | X | -0.00000000 | -0.00070697 | -0.00381762 | 0.00065579  | -0.00000000 |
|    |   | Y | 0.00000000  | 0.00046206  | 0.00037624  | -0.00011413 | -0.00000000 |
|    |   | Z | 0.00745843  | -0.00000000 | 0.00000000  | -0.00000000 | 0.00529592  |
| 14 | H | X | 0.00000000  | 0.14933617  | -0.16615655 | 0.23761177  | 0.00000000  |
|    |   | Y | 0.00000000  | 0.04952924  | -0.12511356 | 0.17208199  | 0.00000000  |
|    |   | Z | 0.00747302  | -0.00000000 | -0.00000000 | 0.00000000  | -0.00675616 |
| 15 | H | X | 0.00000000  | 0.08252320  | -0.07311744 | 0.26767498  | 0.00000000  |
|    |   | Y | 0.00000000  | -0.02403783 | 0.03773281  | -0.09511718 | -0.00000000 |
|    |   | Z | -0.00514724 | 0.00000000  | -0.00000000 | 0.00000000  | 0.00217982  |
| 16 | H | X | -0.00000000 | -0.24054553 | -0.15576397 | -0.17827148 | 0.00000000  |
|    |   | Y | -0.00000000 | -0.25588457 | -0.10352221 | -0.23368814 | 0.00000000  |
|    |   | Z | -0.00072990 | 0.00000000  | -0.00000000 | 0.00000000  | 0.00039653  |
| 17 | H | X | -0.00000000 | -0.18232702 | 0.06187190  | -0.12990292 | -0.00000000 |
|    |   | Y | 0.00000000  | 0.43409444  | -0.13493035 | 0.30433293  | 0.00000000  |

|    |   |   |             |             |             |             |             |
|----|---|---|-------------|-------------|-------------|-------------|-------------|
| 18 | H | Z | -0.00403072 | -0.00000000 | 0.00000000  | -0.00000000 | 0.00202664  |
|    |   | X | 0.33321138  | 0.10158871  | 0.32042349  | -0.05386373 | -0.27946980 |
|    |   | Y | -0.05274901 | -0.02352959 | -0.10030870 | 0.01846248  | 0.00663869  |
| 19 | H | Z | -0.01566517 | 0.00505112  | 0.02050179  | -0.00964482 | 0.02233993  |
|    |   | X | -0.33321138 | 0.10158871  | 0.32042349  | -0.05386373 | 0.27946980  |
|    |   | Y | 0.05274901  | -0.02352959 | -0.10030870 | 0.01846248  | -0.00663869 |
| 20 | H | Z | -0.01566517 | -0.00505112 | -0.02050179 | 0.00964482  | 0.02233993  |
|    |   | X | 0.26376216  | 0.05675239  | 0.26283045  | -0.03221592 | -0.13559342 |
|    |   | Y | -0.16082682 | -0.02379081 | -0.07165951 | 0.01241809  | 0.20332680  |
| 21 | H | Z | 0.02879494  | -0.00101049 | -0.00106920 | 0.00097066  | -0.03385153 |
|    |   | X | -0.26376216 | 0.05675239  | 0.26283045  | -0.03221592 | 0.13559342  |
|    |   | Y | 0.16082682  | -0.02379081 | -0.07165951 | 0.01241809  | -0.20332680 |
| 22 | H | Z | 0.02879494  | 0.00101049  | 0.00106920  | -0.00097066 | -0.03385153 |
|    |   | X | 0.37814746  | 0.01577850  | 0.11883187  | -0.02125662 | 0.53727517  |
|    |   | Y | 0.21499316  | 0.00813476  | 0.01186982  | -0.00154729 | -0.04186451 |
| 23 | H | Z | -0.04397363 | 0.00427050  | 0.02190449  | -0.00410338 | 0.02492947  |
|    |   | X | -0.37814746 | 0.01577850  | 0.11883187  | -0.02125662 | -0.53727517 |
|    |   | Y | -0.21499316 | 0.00813476  | 0.01186982  | -0.00154729 | 0.04186451  |
|    |   | Z | -0.04397363 | -0.00427050 | -0.02190449 | 0.00410338  | 0.02492947  |

|                |   |             |             |             |             |             |
|----------------|---|-------------|-------------|-------------|-------------|-------------|
| TRANS. SAYVETZ | X | -0.00000000 | -0.00090875 | -0.00059777 | -0.00040239 | 0.00000000  |
|                | Y | 0.00000000  | -0.00015417 | 0.00052548  | 0.00000548  | -0.00000000 |
|                | Z | -0.00027747 | -0.00000000 | 0.00000000  | -0.00000000 | 0.00010706  |
| TOTAL          |   | 0.00027747  | 0.00092173  | 0.00079590  | 0.00040242  | 0.00010706  |

|              |   |             |             |             |             |             |
|--------------|---|-------------|-------------|-------------|-------------|-------------|
| ROT. SAYVETZ | X | -0.00065150 | 0.00000000  | -0.00000000 | 0.00000000  | 0.00163776  |
|              | Y | -0.00114279 | 0.00000000  | -0.00000000 | -0.00000000 | 0.00121323  |
|              | Z | 0.00000000  | -0.00158213 | -0.00175867 | 0.00059909  | -0.00000000 |
| TOTAL        |   | 0.00131546  | 0.00158213  | 0.00175867  | 0.00059909  | 0.00203818  |

|               | 46      | 47      | 48      | 49      | 50      |
|---------------|---------|---------|---------|---------|---------|
| FREQUENCY:    | 1337.57 | 1357.83 | 1389.14 | 1398.76 | 1439.95 |
| SYMMETRY:     | A'      | A''     | A'      | A'      | A'      |
| REDUCED MASS: | 1.63311 | 1.07769 | 1.41503 | 1.28756 | 1.70363 |

|   |   |   |             |             |             |             |             |
|---|---|---|-------------|-------------|-------------|-------------|-------------|
| 1 | N | X | 0.02422163  | 0.00000000  | -0.00847522 | -0.00622052 | -0.00436506 |
|   |   | Y | 0.01470705  | 0.00000000  | -0.01256931 | 0.00719488  | -0.01008081 |
|   |   | Z | -0.00000000 | -0.00017715 | 0.00000000  | 0.00000000  | 0.00000000  |
| 2 | C | X | -0.01148478 | 0.00000000  | 0.01963928  | -0.03283358 | 0.00821550  |
|   |   | Y | -0.01634094 | -0.00000000 | 0.01418382  | -0.00844270 | 0.01074086  |
|   |   | Z | -0.00000000 | 0.00107036  | -0.00000000 | 0.00000000  | 0.00000000  |
| 3 | C | X | -0.09318422 | -0.00000000 | 0.03988279  | 0.00989321  | 0.02320812  |
|   |   | Y | -0.01355116 | -0.00000000 | 0.03120051  | -0.08539431 | -0.00015974 |
|   |   | Z | -0.00000000 | 0.00228287  | 0.00000000  | 0.00000000  | -0.00000000 |
| 4 | C | X | -0.01930040 | -0.00000000 | -0.00523948 | 0.07479903  | 0.02205818  |
|   |   | Y | 0.00183275  | 0.00000000  | -0.00518191 | -0.00290579 | -0.00929991 |
|   |   | Z | -0.00000000 | -0.00010176 | -0.00000000 | 0.00000000  | -0.00000000 |
| 5 | C | X | 0.01409554  | -0.00000000 | -0.00380233 | 0.00164774  | 0.00281139  |
|   |   | Y | -0.02620515 | -0.00000000 | 0.00725791  | 0.03298545  | 0.01849942  |
|   |   | Z | 0.00000000  | -0.00027293 | -0.00000000 | -0.00000000 | 0.00000000  |
| 6 | C | X | -0.00818594 | -0.00000000 | 0.00594286  | -0.02791043 | -0.00915054 |
|   |   | Y | 0.01179159  | -0.00000000 | -0.01321400 | 0.03682457  | 0.00410563  |
|   |   | Z | 0.00000000  | -0.00037441 | -0.00000000 | -0.00000000 | -0.00000000 |
| 7 | C | X | 0.10402919  | 0.00000000  | -0.07091084 | -0.01979837 | -0.07130310 |
|   |   | Y | -0.02793450 | -0.00000000 | 0.02301783  | 0.00664770  | 0.03395719  |
|   |   | Z | 0.00000000  | -0.01849089 | -0.00000000 | -0.00000000 | 0.00000000  |
| 8 | C | X | -0.02248018 | -0.00000000 | 0.06198477  | -0.00349536 | 0.12459364  |
|   |   | Y | -0.01146490 | -0.00000000 | -0.01468974 | -0.00540514 | -0.05327471 |
|   |   | Z | 0.00000000  | -0.05724203 | -0.00000000 | -0.00000000 | -0.00000000 |
| 9 | C | X | -0.06032826 | -0.00000000 | 0.06551953  | 0.03220660  | -0.09681330 |

|    |   |   |             |             |             |             |             |
|----|---|---|-------------|-------------|-------------|-------------|-------------|
|    |   | Y | 0.01541313  | 0.00000000  | 0.01106649  | 0.00372845  | 0.01523811  |
|    |   | Z | -0.00000000 | 0.02863606  | -0.00000000 | 0.00000000  | 0.00000000  |
| 10 | O | X | -0.00745792 | -0.00000000 | 0.00280987  | 0.00847018  | 0.00484185  |
|    |   | Y | 0.02047517  | 0.00000000  | -0.01979373 | 0.00871831  | -0.01988565 |
|    |   | Z | 0.00000000  | 0.00244791  | 0.00000000  | -0.00000000 | -0.00000000 |
| 11 | C | X | -0.06096408 | 0.00000000  | -0.08099885 | -0.02206755 | 0.02133854  |
|    |   | Y | 0.04407368  | -0.00000000 | 0.02195721  | 0.00413003  | -0.00067146 |
|    |   | Z | 0.00000000  | 0.03786672  | 0.00000000  | 0.00000000  | -0.00000000 |
| 12 | N | X | 0.00513339  | -0.00000000 | 0.00111061  | -0.00015560 | 0.00039448  |
|    |   | Y | -0.02105124 | 0.00000000  | -0.01688889 | -0.00378652 | 0.00167827  |
|    |   | Z | 0.00000000  | 0.00300962  | 0.00000000  | 0.00000000  | -0.00000000 |
| 13 | N | X | -0.01174384 | 0.00000000  | -0.01843862 | -0.00522028 | 0.00482381  |
|    |   | Y | -0.00270098 | 0.00000000  | -0.00744876 | -0.00230636 | 0.00228769  |
|    |   | Z | -0.00000000 | -0.00001419 | -0.00000000 | -0.00000000 | 0.00000000  |
| 14 | H | X | 0.14180860  | 0.00000000  | -0.18819827 | 0.42688973  | -0.02777817 |
|    |   | Y | 0.11797175  | 0.00000000  | -0.16875274 | 0.40111433  | -0.01984272 |
|    |   | Z | -0.00000000 | -0.01409432 | 0.00000000  | -0.00000000 | -0.00000000 |
| 15 | H | X | 0.08033387  | 0.00000000  | 0.05450187  | -0.40379521 | -0.09278702 |
|    |   | Y | -0.02839123 | -0.00000000 | -0.02175830 | 0.13250611  | 0.02250351  |
|    |   | Z | -0.00000000 | 0.00073222  | -0.00000000 | -0.00000000 | 0.00000000  |
| 16 | H | X | 0.11152999  | 0.00000000  | -0.00822751 | -0.22046409 | -0.08001422 |
|    |   | Y | 0.07427796  | 0.00000000  | 0.00346353  | -0.20100486 | -0.06850127 |
|    |   | Z | 0.00000000  | 0.00042733  | 0.00000000  | 0.00000000  | 0.00000000  |
| 17 | H | X | -0.02063801 | -0.00000000 | -0.01705160 | 0.07875225  | 0.00811985  |
|    |   | Y | 0.05538395  | 0.00000000  | 0.05365968  | -0.29305644 | -0.05381403 |
|    |   | Z | 0.00000000  | 0.00186661  | 0.00000000  | 0.00000000  | 0.00000000  |
| 18 | H | X | 0.01242518  | -0.40267595 | -0.18425393 | -0.02196261 | -0.33158722 |
|    |   | Y | 0.00528592  | -0.03663954 | 0.05884585  | 0.01041895  | 0.16263359  |
|    |   | Z | -0.01481661 | 0.02649133  | -0.01417642 | -0.00899744 | -0.08367879 |
| 19 | H | X | 0.01242518  | 0.40267595  | -0.18425393 | -0.02196261 | -0.33158722 |
|    |   | Y | 0.00528592  | 0.03663954  | 0.05884585  | 0.01041895  | 0.16263359  |
|    |   | Z | 0.01481661  | 0.02649133  | 0.01417642  | 0.00899744  | 0.08367879  |
| 20 | H | X | 0.33850863  | 0.53088120  | -0.22620236 | -0.09999513 | 0.32852286  |
|    |   | Y | -0.05462875 | -0.03156555 | 0.02730947  | 0.01508896  | -0.04182861 |
|    |   | Z | 0.00367743  | -0.01085733 | 0.02288850  | 0.00739796  | -0.00777223 |
| 21 | H | X | 0.33850863  | -0.53088120 | -0.22620236 | -0.09999513 | 0.32852286  |
|    |   | Y | -0.05462875 | 0.03156555  | 0.02730947  | 0.01508896  | -0.04182861 |
|    |   | Z | -0.00367743 | -0.01085733 | -0.02288850 | -0.00739796 | 0.00777223  |
| 22 | H | X | 0.36828021  | -0.09276997 | 0.45606886  | 0.12086084  | -0.09348566 |
|    |   | Y | -0.02618893 | 0.07116877  | -0.05554589 | -0.01584441 | 0.02529702  |
|    |   | Z | 0.05737457  | -0.00963091 | 0.06314080  | 0.01616894  | -0.01774233 |
| 23 | H | X | 0.36828021  | 0.09276997  | 0.45606886  | 0.12086084  | -0.09348566 |
|    |   | Y | -0.02618893 | -0.07116877 | -0.05554589 | -0.01584441 | 0.02529702  |
|    |   | Z | -0.05737457 | -0.00963091 | -0.06314080 | -0.01616894 | 0.01774233  |

|                |       |             |             |             |             |             |
|----------------|-------|-------------|-------------|-------------|-------------|-------------|
| TRANS. SAYVETZ | X     | -0.00114810 | -0.00000000 | -0.00044846 | 0.00063331  | 0.00031747  |
|                | Y     | 0.00092497  | -0.00000000 | 0.00103416  | 0.00024590  | -0.00017149 |
|                | Z     | -0.00000000 | 0.00005168  | -0.00000000 | -0.00000000 | -0.00000000 |
|                | TOTAL | 0.00147435  | 0.00005168  | 0.00112721  | 0.00067938  | 0.00036083  |

|              |       |            |             |             |             |             |
|--------------|-------|------------|-------------|-------------|-------------|-------------|
| ROT. SAYVETZ | X     | 0.00000000 | -0.00108894 | -0.00000000 | -0.00000000 | -0.00000000 |
|              | Y     | 0.00000000 | -0.00026191 | 0.00000000  | 0.00000000  | -0.00000000 |
|              | Z     | 0.00685713 | -0.00000000 | 0.01279409  | 0.00029141  | 0.00193695  |
|              | TOTAL | 0.00685713 | 0.00111999  | 0.01279409  | 0.00029141  | 0.00193695  |

|               |  |         |         |         |         |         |
|---------------|--|---------|---------|---------|---------|---------|
|               |  | 51      | 52      | 53      | 54      | 55      |
| FREQUENCY:    |  | 1487.61 | 1500.13 | 1525.68 | 1536.67 | 1554.70 |
| SYMMETRY:     |  | A'      | A'      | A'      | A'      | A'      |
| REDUCED MASS: |  | 2.23520 | 1.07802 | 1.10838 | 1.09428 | 2.26558 |

|    |   |   |             |             |             |             |             |
|----|---|---|-------------|-------------|-------------|-------------|-------------|
| 1  | N | X | 0.11522805  | -0.00532178 | 0.00817907  | 0.00115292  | 0.03933468  |
|    |   | Y | -0.00029723 | -0.00022759 | 0.00885311  | 0.00332092  | -0.04645502 |
|    |   | Z | 0.00000000  | -0.00000000 | 0.00000000  | 0.00000000  | -0.00000000 |
| 2  | C | X | -0.05840695 | 0.00309838  | -0.01770659 | -0.00573168 | 0.04598965  |
|    |   | Y | 0.05665670  | -0.00240608 | -0.00360080 | -0.00181538 | 0.04632486  |
|    |   | Z | 0.00000000  | 0.00000000  | -0.00000000 | 0.00000000  | 0.00000000  |
| 3  | C | X | 0.00090845  | -0.00069843 | 0.01263712  | 0.00558613  | -0.09768111 |
|    |   | Y | -0.12898805 | 0.00559452  | -0.01165021 | -0.00315507 | 0.02405750  |
|    |   | Z | 0.00000000  | 0.00000000  | 0.00000000  | -0.00000000 | 0.00000000  |
| 4  | C | X | 0.02222332  | -0.00140103 | 0.00023091  | 0.00020460  | 0.00425809  |
|    |   | Y | 0.03017625  | -0.00127163 | 0.01103069  | 0.00379505  | -0.06652993 |
|    |   | Z | 0.00000000  | 0.00000000  | -0.00000000 | -0.00000000 | 0.00000000  |
| 5  | C | X | -0.02400102 | 0.00128158  | -0.01633826 | -0.00616539 | 0.10256965  |
|    |   | Y | 0.04496977  | -0.00245140 | -0.00671737 | -0.00294892 | 0.08914902  |
|    |   | Z | 0.00000000  | -0.00000000 | 0.00000000  | -0.00000000 | -0.00000000 |
| 6  | C | X | -0.02412195 | 0.00078417  | 0.01037957  | 0.00425932  | -0.07408022 |
|    |   | Y | -0.07385319 | 0.00417388  | -0.01615079 | -0.00544083 | 0.02714640  |
|    |   | Z | -0.00000000 | -0.00000000 | 0.00000000  | 0.00000000  | -0.00000000 |
| 7  | C | X | -0.01183681 | 0.00157860  | 0.00278987  | -0.00225373 | 0.04502597  |
|    |   | Y | -0.00375605 | -0.00087942 | 0.00389214  | 0.00168199  | -0.01100462 |
|    |   | Z | 0.00000000  | -0.00000000 | 0.00000000  | -0.00000000 | -0.00000000 |
| 8  | C | X | 0.00279987  | 0.00416150  | -0.04321259 | -0.01097326 | -0.01968464 |
|    |   | Y | 0.00589408  | 0.01039517  | -0.06342247 | -0.02350035 | -0.00228702 |
|    |   | Z | 0.00000000  | -0.00000000 | 0.00000000  | 0.00000000  | -0.00000000 |
| 9  | C | X | -0.00238562 | -0.00605367 | 0.02046474  | -0.00111740 | 0.00411281  |
|    |   | Y | 0.00174914  | 0.00830933  | 0.01613088  | -0.07801023 | -0.00358033 |
|    |   | Z | 0.00000000  | 0.00000000  | -0.00000000 | -0.00000000 | 0.00000000  |
| 10 | O | X | 0.01200589  | -0.00040840 | -0.00113147 | -0.00033316 | -0.00310988 |
|    |   | Y | 0.02003339  | -0.00010821 | -0.00427416 | -0.00116823 | 0.00386881  |
|    |   | Z | -0.00000000 | 0.00000000  | -0.00000000 | 0.00000000  | -0.00000000 |
| 11 | C | X | 0.00017681  | -0.00483594 | 0.00260189  | -0.01090758 | -0.00016258 |
|    |   | Y | -0.00297240 | -0.07166787 | -0.00523241 | -0.00927586 | -0.00107712 |
|    |   | Z | -0.00000000 | -0.00000000 | -0.00000000 | 0.00000000  | 0.00000000  |
| 12 | N | X | -0.00000952 | 0.00227855  | -0.00061337 | 0.00114879  | 0.00010921  |
|    |   | Y | -0.00032045 | -0.01239126 | 0.00005323  | -0.00229859 | -0.00019363 |
|    |   | Z | -0.00000000 | 0.00000000  | 0.00000000  | -0.00000000 | -0.00000000 |
| 13 | N | X | -0.00042985 | -0.01306997 | -0.00155953 | -0.00183175 | -0.00010727 |
|    |   | Y | -0.00021977 | -0.00504297 | -0.00099699 | -0.00041495 | -0.00000061 |
|    |   | Z | 0.00000000  | 0.00000000  | -0.00000000 | -0.00000000 | -0.00000000 |
| 14 | H | X | -0.17643406 | 0.01030045  | 0.01113346  | 0.00792608  | -0.30545806 |
|    |   | Y | -0.03549325 | 0.00330726  | 0.02264469  | 0.01049563  | -0.26054993 |
|    |   | Z | 0.00000000  | 0.00000000  | -0.00000000 | -0.00000000 | 0.00000000  |
| 15 | H | X | -0.21116236 | 0.01025166  | 0.01334852  | 0.00701968  | -0.16742593 |
|    |   | Y | 0.10138026  | -0.00484912 | 0.01026356  | 0.00289590  | -0.03491885 |
|    |   | Z | 0.00000000  | -0.00000000 | 0.00000000  | -0.00000000 | -0.00000000 |
| 16 | H | X | -0.04372720 | 0.00232909  | 0.03487488  | 0.01272154  | -0.24313952 |
|    |   | Y | 0.04179330  | -0.00228225 | 0.05115707  | 0.01824136  | -0.28799737 |
|    |   | Z | -0.00000000 | -0.00000000 | -0.00000000 | 0.00000000  | -0.00000000 |
| 17 | H | X | -0.22118037 | 0.01040406  | -0.02230532 | -0.00586724 | -0.01350685 |
|    |   | Y | 0.49767281  | -0.02366514 | 0.08434360  | 0.02639702  | -0.19011545 |
|    |   | Z | 0.00000000  | 0.00000000  | 0.00000000  | -0.00000000 | -0.00000000 |
| 18 | H | X | -0.01488813 | -0.01368204 | 0.18557577  | 0.06075597  | 0.06999875  |
|    |   | Y | -0.05793542 | -0.05569958 | 0.45234248  | 0.13613666  | 0.05701931  |
|    |   | Z | 0.04577341  | 0.04858750  | -0.38947111 | -0.12165433 | -0.05294859 |
| 19 | H | X | -0.01488813 | -0.01368204 | 0.18557577  | 0.06075597  | 0.06999875  |
|    |   | Y | -0.05793542 | -0.05569958 | 0.45234248  | 0.13613666  | 0.05701931  |
|    |   | Z | -0.04577341 | -0.04858750 | 0.38947111  | 0.12165433  | 0.05294859  |
| 20 | H | X | 0.00664478  | -0.00797650 | -0.06573962 | 0.05241872  | -0.01529026 |
|    |   | Y | 0.00132624  | -0.03672356 | -0.15832177 | 0.49620556  | 0.00624865  |
|    |   | Z | -0.00070221 | 0.03050057  | 0.12901120  | -0.40154702 | -0.00484267 |



|    |   |   |             |             |             |             |             |
|----|---|---|-------------|-------------|-------------|-------------|-------------|
| 21 | H | X | 0.00664478  | -0.00797650 | -0.06573962 | 0.05241872  | -0.01529026 |
|    |   | Y | 0.00132624  | -0.03672356 | -0.15832177 | 0.49620556  | 0.00624865  |
|    |   | Z | 0.00070221  | -0.03050057 | -0.12901120 | 0.40154702  | 0.00484267  |
| 22 | H | X | 0.00493046  | 0.13251991  | -0.00318368 | 0.03630104  | 0.00006264  |
|    |   | Y | 0.01820338  | 0.52861812  | 0.05143497  | 0.05013509  | 0.00862794  |
|    |   | Z | -0.01389784 | -0.39424799 | -0.03730989 | -0.03924333 | -0.00667090 |
| 23 | H | X | 0.00493046  | 0.13251991  | -0.00318368 | 0.03630104  | 0.00006264  |
|    |   | Y | 0.01820338  | 0.52861812  | 0.05143497  | 0.05013509  | 0.00862794  |
|    |   | Z | 0.01389784  | 0.39424799  | 0.03730989  | 0.03924333  | 0.00667090  |

|                |   |             |             |             |             |            |
|----------------|---|-------------|-------------|-------------|-------------|------------|
| TRANS. SAYVETZ | X | -0.00058713 | -0.00018121 | 0.00063906  | -0.00067477 | 0.00042317 |
|                | Y | -0.00010215 | 0.00001965  | -0.00020932 | -0.00009608 | 0.00031542 |
|                | Z | 0.00000000  | -0.00000000 | 0.00000000  | 0.00000000  | 0.00000000 |
| TOTAL          |   | 0.00059595  | 0.00018227  | 0.00067247  | 0.00068158  | 0.00052779 |

|              |   |             |             |             |             |             |
|--------------|---|-------------|-------------|-------------|-------------|-------------|
| ROT. SAYVETZ | X | 0.00000000  | -0.00000000 | -0.00000000 | -0.00000000 | -0.00000000 |
|              | Y | -0.00000000 | 0.00000000  | 0.00000000  | -0.00000000 | 0.00000000  |
|              | Z | 0.00193750  | 0.00082442  | 0.00071604  | -0.00027715 | 0.00063431  |
| TOTAL        |   | 0.00193750  | 0.00082442  | 0.00071604  | 0.00027715  | 0.00063431  |

|               |  |         |         |          |          |         |
|---------------|--|---------|---------|----------|----------|---------|
|               |  | 56      | 57      | 58       | 59       | 60      |
| FREQUENCY:    |  | 1663.54 | 1687.93 | 1807.63  | 2443.48  | 3072.32 |
| SYMMETRY:     |  | A'      | A'      | A'       | A'       | A'      |
| REDUCED MASS: |  | 5.50882 | 5.62013 | 11.78898 | 13.53427 | 1.06063 |

|    |   |   |             |             |             |             |             |
|----|---|---|-------------|-------------|-------------|-------------|-------------|
| 1  | N | X | 0.04279716  | -0.07091672 | 0.00883668  | -0.00002891 | -0.00000891 |
|    |   | Y | -0.06059823 | -0.01626940 | -0.00421946 | 0.00000407  | -0.00006291 |
|    |   | Z | -0.00000000 | 0.00000000  | 0.00000000  | -0.00000000 | 0.00000000  |
| 2  | C | X | 0.00908652  | 0.10731581  | -0.00663853 | 0.00002263  | 0.00205194  |
|    |   | Y | 0.07060025  | 0.08555829  | 0.00892785  | -0.00000124 | -0.00210934 |
|    |   | Z | 0.00000000  | -0.00000000 | -0.00000000 | 0.00000000  | 0.00000000  |
| 3  | C | X | 0.05242252  | -0.08865625 | -0.01029003 | -0.00007679 | -0.00004385 |
|    |   | Y | -0.12154122 | -0.04668525 | -0.03684293 | 0.00012539  | 0.00034120  |
|    |   | Z | -0.00000000 | 0.00000000  | -0.00000000 | -0.00000000 | 0.00000000  |
| 4  | C | X | -0.09572135 | 0.13717413  | -0.00643133 | 0.00001868  | -0.00027599 |
|    |   | Y | 0.07068711  | 0.00776599  | 0.01279232  | -0.00004289 | 0.00000338  |
|    |   | Z | 0.00000000  | -0.00000000 | -0.00000000 | 0.00000000  | -0.00000000 |
| 5  | C | X | 0.01952830  | -0.11145106 | 0.00150033  | -0.00001803 | 0.00011697  |
|    |   | Y | -0.08042200 | -0.07287766 | -0.00750655 | 0.00000828  | 0.00011263  |
|    |   | Z | -0.00000000 | 0.00000000  | 0.00000000  | 0.00000000  | -0.00000000 |
| 6  | C | X | -0.04752707 | 0.04055949  | -0.00396261 | 0.00000416  | 0.00006915  |
|    |   | Y | 0.14320570  | 0.03073100  | 0.00929841  | -0.00000402 | -0.00006460 |
|    |   | Z | 0.00000000  | -0.00000000 | -0.00000000 | -0.00000000 | -0.00000000 |
| 7  | C | X | -0.02246489 | 0.01259194  | 0.07219104  | 0.00007677  | 0.00106706  |
|    |   | Y | -0.01651755 | -0.00465053 | 0.21604764  | -0.00069299 | 0.00036710  |
|    |   | Z | -0.00000000 | -0.00000000 | 0.00000000  | 0.00000000  | -0.00000000 |
| 8  | C | X | -0.00038987 | -0.00401154 | -0.00870995 | -0.00019626 | 0.01369238  |
|    |   | Y | -0.00277165 | -0.00054183 | -0.00834971 | 0.00066009  | 0.06561998  |
|    |   | Z | -0.00000000 | 0.00000000  | -0.00000000 | 0.00000000  | -0.00000000 |
| 9  | C | X | 0.00082648  | 0.00005433  | -0.00102786 | -0.00427802 | -0.00183447 |
|    |   | Y | -0.00022793 | 0.00010684  | 0.00471863  | 0.00033002  | -0.00463720 |
|    |   | Z | 0.00000000  | 0.00000000  | 0.00000000  | 0.00000000  | 0.00000000  |
| 10 | O | X | 0.01064440  | 0.00335266  | -0.04061563 | 0.00008811  | -0.00018090 |
|    |   | Y | 0.01954405  | 0.00914940  | -0.14023224 | 0.00032565  | -0.00060763 |
|    |   | Z | 0.00000000  | 0.00000000  | -0.00000000 | 0.00000000  | -0.00000000 |
| 11 | C | X | -0.00001702 | -0.00007640 | 0.00130951  | -0.00110712 | 0.00000367  |
|    |   | Y | 0.00008689  | -0.00018584 | -0.00274191 | -0.00485402 | -0.00044154 |
|    |   | Z | -0.00000000 | 0.00000000  | -0.00000000 | 0.00000000  | 0.00000000  |
| 12 | N | X | -0.00002633 | -0.00003637 | -0.00060817 | 0.17054127  | 0.00017770  |
|    |   | Y | 0.00006462  | 0.00001094  | 0.00095852  | 0.09109132  | -0.00020402 |

|    |   |   |             |             |              |             |             |
|----|---|---|-------------|-------------|--------------|-------------|-------------|
| 13 | N | Z | 0.00000000  | -0.00000000 | 0.00000000   | -0.00000000 | 0.00000000  |
|    |   | X | -0.00004857 | 0.00004141  | -0.000081524 | -0.16227345 | 0.000000035 |
|    |   | Y | -0.00005392 | 0.00002574  | -0.000073572 | -0.08642307 | 0.000006813 |
| 14 | H | Z | 0.00000000  | -0.00000000 | 0.00000000   | 0.00000000  | -0.00000000 |
|    |   | X | -0.11294511 | -0.16419916 | -0.01246850  | 0.00011602  | -0.02157889 |
|    |   | Y | -0.02916487 | -0.13881637 | 0.00777710   | -0.00002967 | 0.02431495  |
| 15 | H | Z | 0.00000000  | 0.00000000  | 0.00000000   | 0.00000000  | -0.00000000 |
|    |   | X | 0.16436902  | -0.16028025 | 0.01500921   | 0.00001286  | 0.00034850  |
|    |   | Y | 0.00445024  | 0.09848126  | 0.01241492   | -0.00010822 | -0.00020587 |
| 16 | H | Z | -0.00000000 | 0.00000000  | 0.00000000   | 0.00000000  | -0.00000000 |
|    |   | X | 0.10997790  | 0.05953181  | 0.01545747   | -0.00001368 | -0.00010421 |
|    |   | Y | -0.00476820 | 0.12284171  | 0.00672476   | -0.00005660 | -0.00009543 |
| 17 | H | Z | -0.00000000 | 0.00000000  | 0.00000000   | 0.00000000  | 0.00000000  |
|    |   | X | 0.08119173  | 0.05987620  | 0.00268301   | 0.00004561  | -0.00071969 |
|    |   | Y | -0.21982996 | -0.00223379 | -0.00835736  | 0.00002825  | -0.00041145 |
| 18 | H | Z | -0.00000000 | 0.00000000  | -0.00000000  | -0.00000000 | -0.00000000 |
|    |   | X | -0.00110876 | 0.01290616  | 0.04223768   | 0.00123254  | -0.08099177 |
|    |   | Y | 0.01410445  | 0.00369891  | -0.04286427  | 0.00000043  | -0.38517447 |
| 19 | H | Z | -0.01221815 | -0.00562511 | 0.01948686   | 0.00046303  | -0.55841855 |
|    |   | X | -0.00110876 | 0.01290616  | 0.04223768   | 0.00123254  | -0.08099177 |
|    |   | Y | 0.01410445  | 0.00369891  | -0.04286427  | 0.00000043  | -0.38517447 |
| 20 | H | Z | 0.01221815  | 0.00562511  | -0.01948686  | -0.00046303 | 0.55841855  |
|    |   | X | 0.00024100  | -0.00093856 | -0.01062477  | 0.00464969  | 0.00233822  |
|    |   | Y | 0.00048234  | 0.00066973  | 0.00883149   | -0.00070996 | 0.02322634  |
| 21 | H | Z | -0.00057481 | -0.00021222 | 0.00203858   | 0.00017141  | 0.03568935  |
|    |   | X | 0.00024100  | -0.00093856 | -0.01062477  | 0.00464969  | 0.00233822  |
|    |   | Y | 0.00048234  | 0.00066973  | 0.00883149   | -0.00070996 | 0.02322634  |
| 22 | H | Z | 0.00057481  | 0.00021222  | -0.00203858  | -0.00017141 | -0.03568935 |
|    |   | X | -0.00005693 | -0.00006420 | 0.00293844   | -0.03080948 | 0.00146487  |
|    |   | Y | 0.00026046  | 0.00028317  | -0.00362113  | -0.00768154 | 0.00396948  |
| 23 | H | Z | -0.00005168 | -0.00040218 | 0.00047106   | 0.01723881  | 0.00609920  |
|    |   | X | -0.00005693 | -0.00006420 | 0.00293844   | -0.03080948 | 0.00146487  |
|    |   | Y | 0.00026046  | 0.00028317  | -0.00362113  | -0.00768154 | 0.00396948  |
|    |   | Z | 0.00005168  | 0.00040218  | -0.00047106  | -0.01723881 | -0.00609920 |

|                |       |            |             |             |             |             |
|----------------|-------|------------|-------------|-------------|-------------|-------------|
| TRANS. SAYVETZ | X     | 0.00005043 | -0.00003330 | -0.00006168 | 0.00004899  | -0.00017479 |
|                | Y     | 0.00005257 | -0.00003442 | -0.00003497 | -0.00010204 | 0.00002380  |
|                | Z     | 0.00000000 | 0.00000000  | 0.00000000  | 0.00000000  | -0.00000000 |
|                | TOTAL | 0.00007284 | 0.00004790  | 0.00007090  | 0.00011319  | 0.00017640  |

|              |       |             |            |             |             |             |
|--------------|-------|-------------|------------|-------------|-------------|-------------|
| ROT. SAYVETZ | X     | -0.00000000 | 0.00000000 | -0.00000000 | 0.00000000  | -0.00000000 |
|              | Y     | -0.00000000 | 0.00000000 | -0.00000000 | -0.00000000 | 0.00000000  |
|              | Z     | -0.00072814 | 0.00008897 | -0.00006448 | -0.00042756 | -0.00051843 |
|              | TOTAL | 0.00072814  | 0.00008897 | 0.00006448  | 0.00042756  | 0.00051843  |

|               | 61      | 62      | 63      | 64      | 65      |
|---------------|---------|---------|---------|---------|---------|
| FREQUENCY:    | 3118.12 | 3119.01 | 3124.34 | 3174.45 | 3195.81 |
| SYMMETRY:     | A'      | A''     | A'      | A''     | A'      |
| REDUCED MASS: | 1.06002 | 1.10386 | 1.05728 | 1.11014 | 1.09052 |

|   |   |   |             |             |             |             |             |
|---|---|---|-------------|-------------|-------------|-------------|-------------|
| 1 | N | X | 0.00000657  | 0.00000000  | 0.00000174  | 0.00000000  | 0.00001029  |
|   |   | Y | 0.00000900  | 0.00000000  | -0.00000865 | 0.00000000  | 0.00027765  |
|   |   | Z | -0.00000000 | 0.00009265  | -0.00000000 | 0.00001334  | -0.00000000 |
| 2 | C | X | -0.00017281 | -0.00000000 | 0.00028659  | -0.00000000 | 0.05232192  |
|   |   | Y | 0.00017286  | 0.00000000  | -0.00030224 | 0.00000000  | -0.06419809 |
|   |   | Z | -0.00000000 | 0.00011693  | -0.00000000 | 0.00001606  | -0.00000000 |
| 3 | C | X | 0.00003382  | 0.00000000  | 0.00000006  | 0.00000000  | 0.00147055  |
|   |   | Y | 0.00007588  | 0.00000000  | -0.00010163 | 0.00000000  | 0.00344915  |
|   |   | Z | -0.00000000 | -0.00000203 | 0.00000000  | -0.00005418 | -0.00000000 |
| 4 | C | X | 0.00000890  | -0.00000000 | -0.00002173 | 0.00000000  | -0.00072096 |

|    |   |   |             |             |             |             |             |
|----|---|---|-------------|-------------|-------------|-------------|-------------|
|    |   | Y | 0.00003264  | -0.00000000 | -0.00003976 | 0.00000000  | 0.00035691  |
|    |   | Z | -0.00000000 | 0.00001806  | -0.00000000 | 0.00000765  | -0.00000000 |
| 5  | C | X | 0.00001983  | 0.00000000  | -0.00000334 | -0.00000000 | 0.00041720  |
|    |   | Y | -0.00000884 | -0.00000000 | 0.00000727  | 0.00000000  | -0.00045435 |
|    |   | Z | 0.00000000  | -0.00001069 | 0.00000000  | -0.00000378 | 0.00000000  |
| 6  | C | X | -0.00002497 | -0.00000000 | 0.00004699  | 0.00000000  | 0.00383117  |
|    |   | Y | -0.00000963 | -0.00000000 | 0.00001378  | 0.00000000  | 0.00221516  |
|    |   | Z | 0.00000000  | -0.00002178 | 0.00000000  | -0.00000245 | 0.00000000  |
| 7  | C | X | -0.00035192 | -0.00000000 | 0.00019706  | -0.00000000 | 0.00054246  |
|    |   | Y | -0.00058707 | -0.00000000 | 0.00085675  | -0.00000000 | -0.00068918 |
|    |   | Z | 0.00000000  | -0.00084309 | -0.00000000 | -0.00006731 | -0.00000000 |
| 8  | C | X | -0.00020079 | -0.00000000 | 0.00056917  | -0.00000000 | -0.00019425 |
|    |   | Y | -0.00197086 | -0.00000000 | 0.00319111  | -0.00000000 | -0.00195307 |
|    |   | Z | 0.00000000  | -0.08808290 | 0.00000000  | -0.01146763 | -0.00000000 |
| 9  | C | X | -0.00644788 | -0.00000000 | 0.00895162  | -0.00000000 | -0.00010278 |
|    |   | Y | -0.04203970 | -0.00000000 | 0.05087115  | -0.00000000 | -0.00007974 |
|    |   | Z | -0.00000000 | 0.01244374  | -0.00000000 | -0.08176039 | -0.00000000 |
| 10 | O | X | 0.00038059  | 0.00000000  | -0.00042424 | 0.00000000  | -0.00030599 |
|    |   | Y | 0.00020959  | 0.00000000  | -0.00036881 | 0.00000000  | -0.00002901 |
|    |   | Z | 0.00000000  | -0.00017584 | 0.00000000  | 0.00016112  | 0.00000000  |
| 11 | C | X | -0.00357734 | -0.00000000 | -0.00198740 | 0.00000000  | -0.00005037 |
|    |   | Y | 0.05132926  | 0.00000000  | 0.03948306  | 0.00000000  | -0.00002576 |
|    |   | Z | -0.00000000 | -0.00080546 | -0.00000000 | 0.03959494  | -0.00000000 |
| 12 | N | X | 0.00323747  | 0.00000000  | 0.00228511  | 0.00000000  | 0.00000045  |
|    |   | Y | 0.00081227  | 0.00000000  | 0.00115121  | 0.00000000  | 0.00000861  |
|    |   | Z | -0.00000000 | 0.00011806  | 0.00000000  | -0.00026537 | -0.00000000 |
| 13 | N | X | -0.00193686 | -0.00000000 | -0.00179428 | -0.00000000 | -0.00000733 |
|    |   | Y | -0.00071348 | -0.00000000 | -0.00076221 | -0.00000000 | -0.00000499 |
|    |   | Z | 0.00000000  | -0.00002517 | -0.00000000 | 0.00016563  | -0.00000000 |
| 14 | H | X | 0.00204442  | 0.00000000  | -0.00339032 | 0.00000000  | -0.62867016 |
|    |   | Y | -0.00228585 | -0.00000000 | 0.00373687  | -0.00000000 | 0.71423507  |
|    |   | Z | 0.00000000  | -0.00056292 | 0.00000000  | -0.00004492 | 0.00000000  |
| 15 | H | X | -0.00022577 | -0.00000000 | 0.00025870  | -0.00000000 | 0.00085753  |
|    |   | Y | -0.00039714 | -0.00000000 | 0.00066417  | -0.00000000 | -0.00155639 |
|    |   | Z | -0.00000000 | 0.00007466  | -0.00000000 | 0.00001494  | -0.00000000 |
| 16 | H | X | -0.00026669 | -0.00000000 | 0.00020464  | 0.00000000  | -0.00407965 |
|    |   | Y | 0.00023487  | 0.00000000  | -0.00015748 | -0.00000000 | 0.00352980  |
|    |   | Z | -0.00000000 | 0.00001176  | -0.00000000 | -0.00000072 | 0.00000000  |
| 17 | H | X | 0.00031437  | 0.00000000  | -0.00057770 | -0.00000000 | -0.05644837 |
|    |   | Y | 0.00013232  | 0.00000000  | -0.00023496 | -0.00000000 | -0.01909970 |
|    |   | Z | 0.00000000  | -0.00016009 | 0.00000000  | -0.00002943 | 0.00000000  |
| 18 | H | X | 0.00271336  | 0.07946447  | -0.00666169 | 0.01274695  | 0.00340747  |
|    |   | Y | 0.01236203  | 0.39276193  | -0.02159114 | 0.04939872  | 0.01330691  |
|    |   | Z | 0.01710182  | 0.52927920  | -0.03087027 | 0.06765848  | 0.01950368  |
| 19 | H | X | 0.00271336  | -0.07946447 | -0.00666169 | -0.01274695 | 0.00340747  |
|    |   | Y | 0.01236203  | -0.39276193 | -0.02159114 | -0.04939872 | 0.01330691  |
|    |   | Z | -0.01710182 | 0.52927920  | 0.03087027  | 0.06765848  | -0.01950368 |
| 20 | H | X | 0.04113036  | -0.00464394 | -0.04715776 | 0.05982154  | 0.00087692  |
|    |   | Y | 0.23898309  | -0.05309082 | -0.30242567 | 0.35031605  | 0.00159890  |
|    |   | Z | 0.35081138  | -0.07357116 | -0.43809951 | 0.48362125  | 0.00223461  |
| 21 | H | X | 0.04113036  | 0.00464394  | -0.04715776 | -0.05982154 | 0.00087692  |
|    |   | Y | 0.23898309  | 0.05309082  | -0.30242567 | -0.35031605 | 0.00159890  |
|    |   | Z | -0.35081138 | -0.07357116 | 0.43809951  | 0.48362125  | -0.00223461 |
| 22 | H | X | 0.00694545  | -0.00108701 | 0.00759725  | 0.00200013  | -0.00012940 |
|    |   | Y | -0.29426910 | 0.00344329  | -0.23716805 | -0.15805118 | 0.00018793  |
|    |   | Z | -0.44774841 | 0.00425896  | -0.35691406 | -0.23205458 | 0.00023987  |
| 23 | H | X | 0.00694545  | 0.00108701  | 0.00759725  | -0.00200013 | -0.00012940 |
|    |   | Y | -0.29426910 | -0.00344329 | -0.23716805 | 0.15805118  | 0.00018793  |
|    |   | Z | 0.44774841  | 0.00425896  | 0.35691406  | -0.23205458 | -0.00023987 |

|                |       |             |             |             |             |             |
|----------------|-------|-------------|-------------|-------------|-------------|-------------|
| TRANS. SAYVETZ | X     | 0.00008830  | 0.00000000  | -0.00011991 | -0.00000000 | -0.00001923 |
|                | Y     | -0.00005726 | -0.00000000 | 0.00006860  | 0.00000000  | -0.00008558 |
|                | Z     | 0.00000000  | 0.00002993  | 0.00000000  | -0.00009210 | -0.00000000 |
|                | TOTAL | 0.00010524  | 0.00002993  | 0.00013814  | 0.00009210  | 0.00008771  |

|              |       |             |             |             |            |             |
|--------------|-------|-------------|-------------|-------------|------------|-------------|
| ROT. SAYVETZ | X     | 0.00000000  | -0.00002723 | -0.00000000 | 0.00009215 | -0.00000000 |
|              | Y     | -0.00000000 | -0.00004439 | 0.00000000  | 0.00017677 | 0.00000000  |
|              | Z     | -0.00017009 | -0.00000000 | -0.00028621 | 0.00000000 | 0.00048176  |
|              | TOTAL | 0.00017009  | 0.00005208  | 0.00028621  | 0.00019934 | 0.00048176  |

|               |  |         |         |         |         |
|---------------|--|---------|---------|---------|---------|
|               |  | 66      | 67      | 68      | 69      |
| FREQUENCY:    |  | 3196.00 | 3216.25 | 3234.27 | 3246.64 |
| SYMMETRY:     |  | A''     | A'      | A'      | A'      |
| REDUCED MASS: |  | 1.11148 | 1.09107 | 1.09212 | 1.09847 |

|    |   |   |             |             |             |             |
|----|---|---|-------------|-------------|-------------|-------------|
| 1  | N | X | -0.00000000 | 0.00068684  | 0.00043316  | -0.00043441 |
|    |   | Y | -0.00000000 | 0.00002618  | -0.00011520 | 0.00014152  |
|    |   | Z | 0.00000374  | 0.00000000  | 0.00000000  | 0.00000000  |
| 2  | C | X | -0.00000000 | 0.00381260  | 0.00197122  | -0.00079925 |
|    |   | Y | 0.00000000  | -0.00367039 | -0.00143296 | 0.00134589  |
|    |   | Z | 0.00000633  | 0.00000000  | -0.00000000 | -0.00000000 |
| 3  | C | X | -0.00000000 | 0.00032115  | -0.00121202 | -0.00184376 |
|    |   | Y | -0.00000000 | 0.00011025  | 0.00127889  | 0.00178028  |
|    |   | Z | -0.00003764 | 0.00000000  | 0.00000000  | 0.00000000  |
| 4  | C | X | 0.00000000  | 0.00123482  | -0.01255838 | -0.01947600 |
|    |   | Y | 0.00000000  | 0.00822058  | -0.05359000 | -0.06027149 |
|    |   | Z | 0.00000001  | 0.00000000  | -0.00000000 | -0.00000000 |
| 5  | C | X | -0.00000000 | 0.02347901  | -0.03837206 | 0.04323339  |
|    |   | Y | 0.00000000  | -0.01760902 | 0.04055120  | -0.03687138 |
|    |   | Z | -0.00000071 | 0.00000000  | -0.00000000 | -0.00000000 |
| 6  | C | X | -0.00000000 | -0.07320747 | -0.02697542 | 0.01412504  |
|    |   | Y | -0.00000000 | -0.02495470 | -0.01173639 | 0.00754967  |
|    |   | Z | -0.00000072 | -0.00000000 | -0.00000000 | 0.00000000  |
| 7  | C | X | -0.00000000 | 0.00001242  | 0.00002080  | -0.00009676 |
|    |   | Y | 0.00000000  | 0.00002572  | -0.00073949 | -0.00084243 |
|    |   | Z | 0.00008330  | -0.00000000 | -0.00000000 | -0.00000000 |
| 8  | C | X | -0.00000000 | -0.00002695 | 0.00007024  | 0.00011408  |
|    |   | Y | -0.00000000 | -0.00006439 | 0.00000964  | 0.00005590  |
|    |   | Z | -0.00430338 | 0.00000000  | -0.00000000 | 0.00000000  |
| 9  | C | X | -0.00000000 | 0.00000322  | 0.00000124  | 0.00001034  |
|    |   | Y | -0.00000000 | 0.00005195  | -0.00006203 | -0.00005852 |
|    |   | Z | -0.03810982 | -0.00000000 | 0.00000000  | -0.00000000 |
| 10 | O | X | 0.00000000  | 0.00000529  | -0.00024217 | -0.00016886 |
|    |   | Y | 0.00000000  | -0.00006091 | 0.00031954  | 0.00038337  |
|    |   | Z | 0.00004957  | 0.00000000  | 0.00000000  | -0.00000000 |
| 11 | C | X | 0.00000000  | 0.00000607  | -0.00000125 | -0.00001467 |
|    |   | Y | -0.00000000 | 0.00000074  | 0.00001328  | 0.00000149  |
|    |   | Z | -0.08374084 | -0.00000000 | 0.00000000  | 0.00000000  |
| 12 | N | X | 0.00000000  | -0.00000808 | 0.00000148  | 0.00002163  |
|    |   | Y | 0.00000000  | -0.00000033 | -0.00000426 | -0.00000051 |
|    |   | Z | 0.00078515  | -0.00000000 | 0.00000000  | -0.00000000 |
| 13 | N | X | -0.00000000 | 0.00000345  | 0.00000390  | -0.00000711 |
|    |   | Y | -0.00000000 | 0.00000064  | 0.00000352  | 0.00000007  |
|    |   | Z | -0.00045678 | -0.00000000 | -0.00000000 | 0.00000000  |
| 14 | H | X | 0.00000000  | -0.03404099 | -0.01611422 | 0.00794331  |
|    |   | Y | -0.00000000 | 0.03868695  | 0.01783223  | -0.00958050 |
|    |   | Z | 0.00001677  | 0.00000000  | 0.00000000  | 0.00000000  |
| 15 | H | X | -0.00000000 | -0.02608052 | 0.16815975  | 0.19033907  |
|    |   | Y | -0.00000000 | -0.09689261 | 0.61420910  | 0.67497018  |
|    |   | Z | 0.00000833  | 0.00000000  | 0.00000000  | 0.00000000  |

|    |   |   |             |             |             |             |
|----|---|---|-------------|-------------|-------------|-------------|
| 16 | H | X | 0.00000000  | -0.25800886 | 0.46202973  | -0.45590090 |
|    |   | Y | -0.00000000 | 0.23268658  | -0.43342988 | 0.42016716  |
|    |   | Z | 0.00000466  | 0.00000000  | -0.00000000 | -0.00000000 |
| 17 | H | X | 0.00000000  | 0.83636798  | 0.30094626  | -0.15335253 |
|    |   | Y | 0.00000000  | 0.27683860  | 0.10303761  | -0.05454547 |
|    |   | Z | -0.00000838 | -0.00000000 | 0.00000000  | -0.00000000 |
| 18 | H | X | 0.00656624  | 0.00019143  | -0.00002793 | -0.00011801 |
|    |   | Y | 0.01974197  | 0.00044232  | 0.00031625  | -0.00006342 |
|    |   | Z | 0.02639357  | 0.00058930  | 0.00034297  | -0.00013888 |
| 19 | H | X | -0.00656624 | 0.00019143  | -0.00002793 | -0.00011801 |
|    |   | Y | -0.01974197 | 0.00044232  | 0.00031625  | -0.00006342 |
|    |   | Z | 0.02639357  | -0.00058930 | -0.00034297 | 0.00013888  |
| 20 | H | X | 0.02419691  | -0.00002362 | 0.00010163  | 0.00004766  |
|    |   | Y | 0.16451275  | -0.00029646 | 0.00024732  | 0.00015829  |
|    |   | Z | 0.22504051  | -0.00033073 | 0.00040691  | 0.00019914  |
| 21 | H | X | -0.02419691 | -0.00002362 | 0.00010163  | 0.00004766  |
|    |   | Y | -0.16451275 | -0.00029646 | 0.00024732  | 0.00015829  |
|    |   | Z | 0.22504051  | 0.00033073  | -0.00040691 | -0.00019914 |
| 22 | H | X | -0.01681666 | 0.00000352  | -0.00001454 | -0.00001261 |
|    |   | Y | 0.34540899  | -0.00002228 | -0.00000847 | 0.00007889  |
|    |   | Z | 0.49658235  | -0.00002920 | -0.00002823 | 0.00009228  |
| 23 | H | X | 0.01681666  | 0.00000352  | -0.00001454 | -0.00001261 |
|    |   | Y | -0.34540899 | -0.00002228 | -0.00000847 | 0.00007889  |
|    |   | Z | 0.49658235  | 0.00002920  | 0.00002823  | -0.00009228 |

|                |       |             |             |             |             |
|----------------|-------|-------------|-------------|-------------|-------------|
| TRANS. SAYVETZ | X     | -0.00000000 | -0.00010582 | -0.00009922 | 0.00009413  |
|                | Y     | -0.00000000 | -0.00017424 | 0.00012149  | -0.00019027 |
|                | Z     | -0.00003734 | 0.00000000  | -0.00000000 | -0.00000000 |
|                | TOTAL | 0.00003734  | 0.00020386  | 0.00015686  | 0.00021228  |

|              |       |             |             |             |             |
|--------------|-------|-------------|-------------|-------------|-------------|
| ROT. SAYVETZ | X     | -0.00008425 | 0.00000000  | 0.00000000  | -0.00000000 |
|              | Y     | 0.00001140  | 0.00000000  | -0.00000000 | -0.00000000 |
|              | Z     | -0.00000000 | -0.00034291 | -0.00043946 | 0.00043204  |
|              | TOTAL | 0.00008501  | 0.00034291  | 0.00043946  | 0.00043204  |

REFERENCE ON SAYVETZ CONDITIONS - A. SAYVETZ, J.CHEM.PHYS., 7, 383-389(1939).

NOTE - THE MODES J,K ARE ORTHONORMALIZED ACCORDING TO  

$$\text{SUM ON I } M(I) * (X(I,J)*X(I,K) + Y(I,J)*Y(I,K) + Z(I,J)*Z(I,K)) = \text{DELTA}(J,K)$$

Vibrational Analysis, NNKDI CCTT Conformer, CCSD/6-31G\*

-----  
 NORMAL COORDINATE ANALYSIS IN THE HARMONIC APPROXIMATION  
 -----

ATOMIC WEIGHTS (AMU)

|    |   |          |
|----|---|----------|
| 1  | N | 14.00307 |
| 2  | C | 12.00000 |
| 3  | C | 12.00000 |
| 4  | C | 12.00000 |
| 5  | C | 12.00000 |
| 6  | C | 12.00000 |
| 7  | C | 12.00000 |
| 8  | C | 12.00000 |
| 9  | C | 12.00000 |
| 10 | O | 15.99491 |
| 11 | C | 12.00000 |
| 12 | N | 14.00307 |
| 13 | N | 14.00307 |
| 14 | H | 1.00782  |
| 15 | H | 1.00782  |
| 16 | H | 1.00782  |
| 17 | H | 1.00782  |
| 18 | H | 1.00782  |
| 19 | H | 1.00782  |
| 20 | H | 1.00782  |
| 21 | H | 1.00782  |
| 22 | H | 1.00782  |
| 23 | H | 1.00782  |

\* \* \* WARNING, MODE 1 HAS BEEN CHOSEN AS A VIBRATION  
 WHILE MODE 7 IS ASSUMED TO BE A TRANSLATION/ROTATION.  
 PLEASE VERIFY THE PROGRAM'S DECISION MANUALLY!

MODE(S) 1 TO 1 TREATED AS IMAGINARY.

MODES 2 TO 7 ARE TAKEN AS ROTATIONS AND TRANSLATIONS.

ANALYZING SYMMETRY OF NORMAL MODES...

--- SYMMETRY FOR NORMAL MODES ---

INCLUDING TRANSLATION AND ROTATION

43\*A' 26\*A''

EXCLUDING TRANSLATION AND ROTATION (SAYVETZ < 0.01)

36\*A' 7\*A''

FREQUENCIES IN CM\*\*-1, IR INTENSITIES IN DEBYE\*\*2/AMU-ANGSTROM\*\*2,  
 REDUCED MASSES IN AMU.

|               | 1       | 2       | 3       | 4       | 5       |
|---------------|---------|---------|---------|---------|---------|
| FREQUENCY:    | 34.30 I | 20.45   | 14.08   | 10.75   | 10.20   |
| SYMMETRY:     | A''     | A''     | A'      | A'      | A''     |
| REDUCED MASS: | 3.92434 | 8.21201 | 7.99479 | 7.11362 | 7.15858 |

|   |   |   |             |             |            |             |             |
|---|---|---|-------------|-------------|------------|-------------|-------------|
| 1 | N | X | 0.00000000  | -0.00000000 | 0.05373672 | -0.02438708 | 0.00000000  |
|   |   | Y | 0.00000000  | -0.00000000 | 0.02283567 | -0.06983298 | -0.00000000 |
|   |   | Z | -0.04632956 | 0.03372719  | 0.00000000 | 0.00000000  | -0.08943774 |

|    |   |   |             |             |             |             |             |
|----|---|---|-------------|-------------|-------------|-------------|-------------|
| 2  | C | X | 0.00000000  | -0.00000000 | 0.05583154  | -0.01913021 | 0.00000000  |
|    |   | Y | -0.00000000 | -0.00000000 | 0.03302170  | -0.04421264 | -0.00000000 |
|    |   | Z | -0.05709555 | 0.06686321  | 0.00000000  | 0.00000000  | -0.07261908 |
| 3  | C | X | 0.00000000  | -0.00000000 | 0.04812231  | -0.03843219 | 0.00000000  |
|    |   | Y | -0.00000000 | -0.00000000 | 0.04081241  | -0.02471829 | -0.00000000 |
|    |   | Z | 0.03445451  | 0.07024314  | 0.00000000  | 0.00000000  | -0.04746784 |
| 4  | C | X | 0.00000000  | -0.00000000 | 0.03768074  | -0.06469188 | 0.00000000  |
|    |   | Y | -0.00000000 | -0.00000000 | 0.03771001  | -0.03248156 | -0.00000000 |
|    |   | Z | 0.14406879  | 0.03929836  | 0.00000000  | 0.00000000  | -0.03957405 |
| 5  | C | X | 0.00000000  | -0.00000000 | 0.03540802  | -0.07041544 | 0.00000000  |
|    |   | Y | 0.00000000  | -0.00000000 | 0.02712728  | -0.05910744 | -0.00000000 |
|    |   | Z | 0.15557418  | 0.00615700  | 0.00000000  | 0.00000000  | -0.05806738 |
| 6  | C | X | 0.00000000  | -0.00000000 | 0.04367097  | -0.04968357 | 0.00000000  |
|    |   | Y | 0.00000000  | -0.00000000 | 0.02004173  | -0.07688514 | -0.00000000 |
|    |   | Z | 0.05862827  | 0.00386767  | 0.00000000  | 0.00000000  | -0.08260396 |
| 7  | C | X | 0.00000000  | -0.00000000 | 0.05151158  | -0.02992591 | 0.00000000  |
|    |   | Y | -0.00000000 | -0.00000000 | 0.05184105  | 0.00285379  | -0.00000000 |
|    |   | Z | 0.00968335  | 0.10329487  | 0.00000000  | 0.00000000  | -0.03035878 |
| 8  | C | X | 0.00000000  | -0.00000000 | 0.04340711  | -0.05035249 | 0.00000000  |
|    |   | Y | -0.00000000 | -0.00000000 | 0.06034525  | 0.02411921  | -0.00000000 |
|    |   | Z | 0.06085249  | 0.07439280  | 0.00000000  | -0.00000000 | 0.02758045  |
| 9  | C | X | 0.00000000  | -0.00000000 | 0.04868811  | -0.03699188 | 0.00000000  |
|    |   | Y | -0.00000000 | -0.00000000 | 0.07052833  | 0.04986034  | -0.00000000 |
|    |   | Z | 0.00611540  | 0.09473548  | 0.00000000  | -0.00000000 | 0.03689871  |
| 10 | O | X | 0.00000000  | -0.00000000 | 0.06055284  | -0.00715011 | 0.00000000  |
|    |   | Y | -0.00000000 | -0.00000000 | 0.05432313  | 0.00911209  | -0.00000000 |
|    |   | Z | -0.05412748 | 0.14820033  | 0.00000000  | 0.00000000  | -0.05799539 |
| 11 | C | X | 0.00000000  | -0.00000000 | 0.04113212  | -0.05652164 | 0.00000000  |
|    |   | Y | -0.00000000 | -0.00000000 | 0.07842118  | 0.07022083  | 0.00000000  |
|    |   | Z | 0.05847929  | 0.05274043  | -0.00000000 | -0.00000000 | 0.10733490  |
| 12 | N | X | 0.00000000  | -0.00000000 | 0.04601945  | -0.04375313 | 0.00000000  |
|    |   | Y | -0.00000000 | -0.00000000 | 0.08780450  | 0.09457723  | 0.00000000  |
|    |   | Z | 0.00965008  | 0.06046904  | -0.00000000 | -0.00000000 | 0.11251476  |
| 13 | N | X | 0.00000000  | -0.00000000 | 0.04981045  | -0.03374787 | 0.00000000  |
|    |   | Y | -0.00000000 | -0.00000000 | 0.09432554  | 0.11176499  | 0.00000000  |
|    |   | Z | -0.02713991 | 0.06653323  | -0.00000000 | -0.00000000 | 0.11377713  |
| 14 | H | X | 0.00000000  | -0.00000000 | 0.06405417  | 0.00138597  | 0.00000000  |
|    |   | Y | -0.00000000 | -0.00000000 | 0.03523011  | -0.03867449 | -0.00000000 |
|    |   | Z | -0.14387297 | 0.09117933  | 0.00000000  | 0.00000000  | -0.07830254 |
| 15 | H | X | 0.00000000  | -0.00000000 | 0.03138902  | -0.08058188 | 0.00000000  |
|    |   | Y | -0.00000000 | -0.00000000 | 0.04332425  | -0.01830855 | -0.00000000 |
|    |   | Z | 0.22298894  | 0.04175815  | 0.00000000  | 0.00000000  | -0.02007684 |
| 16 | H | X | 0.00000000  | -0.00000000 | 0.02744514  | -0.09054498 | -0.00000000 |
|    |   | Y | 0.00000000  | -0.00000000 | 0.02437607  | -0.06608564 | -0.00000000 |
|    |   | Z | 0.24048661  | -0.01791030 | 0.00000000  | 0.00000000  | -0.05390279 |
| 17 | H | X | 0.00000000  | -0.00000000 | 0.04217658  | -0.05345351 | 0.00000000  |
|    |   | Y | 0.00000000  | -0.00000000 | 0.01169687  | -0.09785635 | -0.00000000 |
|    |   | Z | 0.06581177  | -0.02340959 | 0.00000000  | 0.00000000  | -0.09724554 |
| 18 | H | X | -0.00944499 | 0.00020941  | 0.03855347  | -0.06267756 | 0.02108302  |
|    |   | Y | 0.05185269  | -0.02490332 | 0.05951644  | 0.02191259  | 0.02755377  |
|    |   | Z | 0.09986854  | 0.05628002  | 0.00001932  | 0.00001345  | 0.04494082  |
| 19 | H | X | 0.00944499  | -0.00020941 | 0.03855347  | -0.06267756 | -0.02108302 |
|    |   | Y | -0.05185269 | 0.02490332  | 0.05951644  | 0.02191259  | -0.02755377 |
|    |   | Z | 0.09986854  | 0.05628002  | -0.00001932 | -0.00001345 | 0.04494082  |
| 20 | H | X | 0.00799349  | 0.00364634  | 0.05338613  | -0.02502258 | -0.02369899 |
|    |   | Y | -0.05245784 | 0.03097945  | 0.07116345  | 0.05145986  | -0.03399727 |
|    |   | Z | -0.03272741 | 0.11682373  | 0.00000115  | -0.00001167 | 0.01452610  |
| 21 | H | X | -0.00799349 | -0.00364634 | 0.05338613  | -0.02502258 | 0.02369899  |
|    |   | Y | 0.05245784  | -0.03097945 | 0.07116345  | 0.05145986  | 0.03399727  |
|    |   | Z | -0.03272741 | 0.11682373  | -0.00000115 | 0.00001167  | 0.01452610  |

|                |   |       |              |             |              |              |             |
|----------------|---|-------|--------------|-------------|--------------|--------------|-------------|
| 22             | H | X     | -0.00616834  | -0.00874824 | 0.03682992   | -0.06784801  | 0.02278815  |
|                |   | Y     | 0.05152745   | -0.02744769 | 0.07873453   | 0.07106734   | 0.03690084  |
|                |   | Z     | 0.09371485   | 0.03334210  | -0.00000839  | -0.00000360  | 0.13399657  |
| 23             | H | X     | 0.00616834   | 0.00874824  | 0.03682992   | -0.06784801  | -0.02278815 |
|                |   | Y     | -0.05152745  | 0.02744769  | 0.07873453   | 0.07106734   | -0.03690084 |
|                |   | Z     | 0.09371485   | 0.03334210  | 0.00000839   | 0.00000360   | 0.13399657  |
| TRANS. SAYVETZ |   | X     | 0.00000000   | -0.00000000 | 8.35426976   | -7.07332533  | 0.00000000  |
|                |   | Y     | -0.00000000  | -0.00000000 | 9.31486063   | 1.04157115   | -0.00000000 |
|                |   | Z     | 4.60235688   | 11.26872944 | 0.00000000   | 0.00000000   | -0.77930294 |
|                |   | TOTAL | 4.60235688   | 11.26872944 | 12.51241191  | 7.14960151   | 0.77930294  |
| ROT. SAYVETZ   |   | X     | -21.75530282 | 9.26670276  | 0.00000000   | 0.00000000   | -5.97618142 |
|                |   | Y     | -15.59286694 | 16.59355968 | -0.00000000  | -0.00000000  | 75.37323220 |
|                |   | Z     | 0.00000000   | -0.00000000 | -27.82717059 | -70.41603523 | -0.00000000 |
|                |   | TOTAL | 26.76622312  | 19.00573605 | 27.82717059  | 70.41603523  | 75.60978030 |

|               |  |         |         |         |         |         |
|---------------|--|---------|---------|---------|---------|---------|
|               |  | 6       | 7       | 8       | 9       | 10      |
| FREQUENCY:    |  | 9.89    | 22.97   | 37.39   | 67.09   | 73.07   |
| SYMMETRY:     |  | A'      | A''     | A''     | A'      | A''     |
| REDUCED MASS: |  | 7.98145 | 7.75624 | 3.24306 | 7.32031 | 2.72578 |

|    |   |   |             |             |             |             |             |
|----|---|---|-------------|-------------|-------------|-------------|-------------|
| 1  | N | X | -0.05023681 | -0.00000000 | -0.00000000 | -0.02978928 | 0.00000000  |
|    |   | Y | 0.09087974  | 0.00000000  | 0.00000000  | 0.05362367  | -0.00000000 |
|    |   | Z | -0.00000000 | 0.14523493  | -0.04464627 | 0.00000000  | 0.01018963  |
| 2  | C | X | -0.05279193 | -0.00000000 | -0.00000000 | -0.03900158 | 0.00000000  |
|    |   | Y | 0.07846301  | 0.00000000  | 0.00000000  | 0.00626220  | 0.00000000  |
|    |   | Z | -0.00000000 | 0.08509073  | -0.05180643 | -0.00000000 | 0.00482214  |
| 3  | C | X | -0.04343344 | -0.00000000 | -0.00000000 | -0.00442323 | -0.00000000 |
|    |   | Y | 0.06901510  | 0.00000000  | 0.00000000  | -0.02920354 | 0.00000000  |
|    |   | Z | -0.00000000 | 0.00239121  | -0.00672221 | -0.00000000 | -0.00535100 |
| 4  | C | X | -0.03068646 | -0.00000000 | -0.00000000 | 0.04134128  | -0.00000000 |
|    |   | Y | 0.07278743  | 0.00000000  | 0.00000000  | -0.01517490 | 0.00000000  |
|    |   | Z | -0.00000000 | -0.02378868 | 0.04950008  | -0.00000000 | -0.01363040 |
| 5  | C | X | -0.02792059 | -0.00000000 | -0.00000000 | 0.05247245  | -0.00000000 |
|    |   | Y | 0.08567942  | 0.00000000  | 0.00000000  | 0.03398925  | -0.00000000 |
|    |   | Z | -0.00000000 | 0.03401027  | 0.06125941  | -0.00000000 | -0.01377335 |
| 6  | C | X | -0.03797395 | -0.00000000 | -0.00000000 | 0.01525458  | -0.00000000 |
|    |   | Y | 0.09429459  | 0.00000000  | 0.00000000  | 0.06607473  | -0.00000000 |
|    |   | Z | -0.00000000 | 0.11922626  | 0.01358651  | 0.00000000  | -0.00077612 |
| 7  | C | X | -0.04757478 | -0.00000000 | -0.00000000 | -0.01535537 | 0.00000000  |
|    |   | Y | 0.05558807  | 0.00000000  | 0.00000000  | -0.06742139 | 0.00000000  |
|    |   | Z | -0.00000000 | -0.04539914 | -0.01402735 | -0.00000000 | -0.01641826 |
| 8  | C | X | -0.03746076 | -0.00000000 | -0.00000000 | -0.00463167 | -0.00000000 |
|    |   | Y | 0.04512077  | 0.00000000  | 0.00000000  | -0.08088356 | 0.00000000  |
|    |   | Z | 0.00000000  | -0.02219686 | -0.08028710 | 0.00000000  | 0.08252532  |
| 9  | C | X | -0.04424019 | -0.00000000 | -0.00000000 | 0.00188983  | -0.00000000 |
|    |   | Y | 0.03205308  | 0.00000000  | 0.00000000  | -0.06767492 | 0.00000000  |
|    |   | Z | 0.00000000  | -0.01040722 | -0.00093975 | 0.00000000  | 0.17452318  |
| 10 | O | X | -0.05874699 | -0.00000000 | -0.00000000 | -0.03692742 | 0.00000000  |
|    |   | Y | 0.05250979  | 0.00000000  | 0.00000000  | -0.07283404 | 0.00000000  |
|    |   | Z | -0.00000000 | -0.08954449 | 0.02283739  | -0.00000000 | -0.10324434 |
| 11 | C | X | -0.03395679 | -0.00000000 | -0.00000000 | -0.03835056 | 0.00000000  |
|    |   | Y | 0.02131195  | 0.00000000  | 0.00000000  | -0.02520631 | 0.00000000  |
|    |   | Z | 0.00000000  | 0.03850148  | -0.12882800 | -0.00000000 | -0.04519152 |
| 12 | N | X | -0.04085467 | -0.00000000 | -0.00000000 | 0.00490266  | -0.00000000 |
|    |   | Y | 0.00808541  | 0.00000000  | 0.00000000  | 0.06010387  | -0.00000000 |
|    |   | Z | 0.00000000  | 0.06943781  | 0.02356795  | -0.00000000 | -0.03628109 |
| 13 | N | X | -0.04643817 | -0.00000000 | -0.00000000 | 0.05611671  | -0.00000000 |
|    |   | Y | -0.00150792 | 0.00000000  | 0.00000000  | 0.14821948  | -0.00000000 |



|    |   |   |             |             |             |             |             |
|----|---|---|-------------|-------------|-------------|-------------|-------------|
|    |   | Z | 0.00000000  | 0.09313753  | 0.15005940  | -0.00000000 | -0.03073055 |
| 14 | H | X | -0.06279769 | -0.00000000 | -0.00000000 | -0.07676529 | 0.00000000  |
|    |   | Y | 0.07576357  | 0.00000000  | 0.00000000  | -0.00410212 | 0.00000000  |
|    |   | Z | -0.00000000 | 0.10585850  | -0.09739174 | -0.00000000 | 0.01162558  |
| 15 | H | X | -0.02296472 | -0.00000000 | -0.00000000 | 0.06834375  | -0.00000000 |
|    |   | Y | 0.06591609  | 0.00000000  | 0.00000000  | -0.03969544 | 0.00000000  |
|    |   | Z | -0.00000000 | -0.09305862 | 0.08678117  | -0.00000000 | -0.02499530 |
| 16 | H | X | -0.01818343 | -0.00000000 | -0.00000000 | 0.08941978  | -0.00000000 |
|    |   | Y | 0.08905634  | 0.00000000  | 0.00000000  | 0.04679182  | -0.00000000 |
|    |   | Z | -0.00000000 | 0.01371577  | 0.10808063  | -0.00000000 | -0.02376071 |
| 17 | H | X | -0.03615679 | -0.00000000 | -0.00000000 | 0.02197451  | -0.00000000 |
|    |   | Y | 0.10443436  | 0.00000000  | 0.00000000  | 0.10347445  | -0.00000000 |
|    |   | Z | -0.00000000 | 0.16867905  | 0.02214878  | 0.00000000  | 0.00107552  |
| 18 | H | X | -0.03134482 | 0.01236507  | 0.00818258  | -0.00406546 | 0.06000065  |
|    |   | Y | 0.04625557  | 0.00800753  | -0.07245156 | -0.07999575 | 0.00167647  |
|    |   | Z | 0.00001393  | -0.01810985 | -0.13477391 | 0.00046463  | 0.07434368  |
| 19 | H | X | -0.03134482 | -0.01236507 | -0.00818258 | -0.00406546 | -0.06000065 |
|    |   | Y | 0.04625557  | -0.00800753 | 0.07245156  | -0.07999575 | -0.00167647 |
|    |   | Z | -0.00001393 | -0.01810985 | -0.13477391 | -0.00046463 | 0.07434368  |
| 20 | H | X | -0.05044722 | -0.01922585 | 0.00075574  | 0.01661702  | 0.02963186  |
|    |   | Y | 0.03120576  | -0.01951364 | 0.10678661  | -0.06372109 | 0.15251176  |
|    |   | Z | -0.00000935 | -0.02255833 | 0.07696398  | 0.00148184  | 0.28318687  |
| 21 | H | X | -0.05044722 | 0.01922585  | -0.00075574 | 0.01661702  | -0.02963186 |
|    |   | Y | 0.03120576  | 0.01951364  | -0.10678661 | -0.06372109 | -0.15251176 |
|    |   | Z | 0.00000935  | -0.02255833 | 0.07696398  | -0.00148184 | 0.28318687  |
| 22 | H | X | -0.02787113 | 0.02741346  | 0.02711533  | -0.07254933 | -0.06197973 |
|    |   | Y | 0.02083438  | 0.01430113  | -0.13884508 | -0.02165424 | -0.13642886 |
|    |   | Z | -0.00001130 | 0.04982713  | -0.22313243 | 0.00053946  | -0.14261025 |
| 23 | H | X | -0.02787113 | -0.02741346 | -0.02711533 | -0.07254933 | 0.06197973  |
|    |   | Y | 0.02083438  | -0.01430113 | 0.13884508  | -0.02165424 | 0.13642886  |
|    |   | Z | 0.00001130  | 0.04982713  | -0.22313243 | -0.00053946 | -0.14261025 |

|                |  |       |             |             |             |             |             |
|----------------|--|-------|-------------|-------------|-------------|-------------|-------------|
| TRANS. SAYVETZ |  | X     | -7.50019839 | -0.00000000 | -0.00000000 | -0.06014091 | -0.00000000 |
|                |  | Y     | 9.39227362  | 0.00000000  | 0.00000000  | 0.12619862  | 0.00000000  |
|                |  | Z     | -0.00000000 | 5.22235272  | -0.17349178 | -0.00000000 | -0.04943936 |
|                |  | TOTAL | 12.01947501 | 5.22235272  | 0.17349178  | 0.13979635  | 0.04943936  |

|              |  |       |             |              |             |             |             |
|--------------|--|-------|-------------|--------------|-------------|-------------|-------------|
| ROT. SAYVETZ |  | X     | -0.00000000 | -1.66298292  | 1.91801007  | -0.00000000 | -1.28247884 |
|              |  | Y     | 0.00000000  | -10.47431546 | 10.47494693 | -0.00000000 | -0.66243054 |
|              |  | Z     | 35.42079439 | -0.00000000  | -0.00000000 | -1.04949032 | -0.00000000 |
|              |  | TOTAL | 35.42079439 | 10.60550784  | 10.64909742 | 1.04949032  | 1.44345634  |

|               |  | 11      | 12      | 13      | 14      | 15      |
|---------------|--|---------|---------|---------|---------|---------|
| FREQUENCY:    |  | 115.65  | 144.31  | 164.91  | 255.09  | 281.99  |
| SYMMETRY:     |  | A''     | A'      | A''     | A'      | A'      |
| REDUCED MASS: |  | 2.74971 | 7.31381 | 3.53189 | 5.64632 | 6.52455 |

|   |   |   |             |             |             |             |             |
|---|---|---|-------------|-------------|-------------|-------------|-------------|
| 1 | N | X | -0.00000000 | -0.00534648 | -0.00000000 | 0.08776099  | -0.01087389 |
|   |   | Y | 0.00000000  | -0.02687019 | 0.00000000  | -0.02913917 | -0.00236155 |
|   |   | Z | -0.00101843 | 0.00000000  | -0.01315605 | -0.00000000 | 0.00000000  |
| 2 | C | X | -0.00000000 | 0.00344562  | -0.00000000 | 0.09426325  | -0.00411049 |
|   |   | Y | 0.00000000  | 0.01937819  | -0.00000000 | 0.03292782  | 0.02790770  |
|   |   | Z | 0.05426537  | 0.00000000  | 0.10167355  | -0.00000000 | 0.00000000  |
| 3 | C | X | -0.00000000 | -0.02357340 | -0.00000000 | 0.04270620  | -0.00655964 |
|   |   | Y | -0.00000000 | 0.04935888  | -0.00000000 | 0.07252079  | 0.03491568  |
|   |   | Z | 0.05978620  | 0.00000000  | 0.11921631  | 0.00000000  | -0.00000000 |
| 4 | C | X | 0.00000000  | -0.06708456 | 0.00000000  | 0.01368169  | -0.04092359 |
|   |   | Y | -0.00000000 | 0.03669370  | -0.00000000 | 0.06466611  | 0.02918851  |
|   |   | Z | 0.02550252  | 0.00000000  | 0.09758715  | 0.00000000  | -0.00000000 |
| 5 | C | X | 0.00000000  | -0.08009143 | 0.00000000  | -0.00033566 | -0.05329358 |

|                |   |   |             |             |             |             |             |
|----------------|---|---|-------------|-------------|-------------|-------------|-------------|
|                |   | Y | 0.00000000  | -0.01043804 | 0.00000000  | -0.00001017 | 0.00036988  |
|                |   | Z | -0.03609123 | 0.00000000  | -0.01814304 | 0.00000000  | 0.00000000  |
| 6              | C | X | 0.00000000  | -0.04753844 | -0.00000000 | 0.04509971  | -0.03964350 |
|                |   | Y | 0.00000000  | -0.03866935 | 0.00000000  | -0.04272327 | -0.01149291 |
|                |   | Z | -0.05701084 | -0.00000000 | -0.10436880 | -0.00000000 | 0.00000000  |
| 7              | C | X | -0.00000000 | -0.01812338 | -0.00000000 | 0.00982002  | -0.00325239 |
|                |   | Y | -0.00000000 | 0.04895184  | -0.00000000 | 0.02884428  | -0.02827801 |
|                |   | Z | 0.03875401  | 0.00000000  | 0.00476565  | 0.00000000  | -0.00000000 |
| 8              | C | X | -0.00000000 | 0.02371472  | -0.00000000 | 0.02996086  | 0.05651370  |
|                |   | Y | -0.00000000 | 0.00916542  | -0.00000000 | -0.03515655 | -0.07613027 |
|                |   | Z | 0.12533478  | 0.00000000  | -0.10094766 | -0.00000000 | -0.00000000 |
| 9              | C | X | -0.00000000 | 0.00444331  | -0.00000000 | -0.01787496 | 0.10143520  |
|                |   | Y | 0.00000000  | -0.05043473 | -0.00000000 | -0.09422664 | -0.01198539 |
|                |   | Z | -0.09027780 | -0.00000000 | 0.00800498  | -0.00000000 | 0.00000000  |
| 10             | O | X | -0.00000000 | -0.04533133 | -0.00000000 | -0.04222698 | -0.08817176 |
|                |   | Y | -0.00000000 | 0.04125407  | -0.00000000 | 0.01325289  | -0.05113643 |
|                |   | Z | -0.05703005 | -0.00000000 | -0.07548336 | 0.00000000  | 0.00000000  |
| 11             | C | X | -0.00000000 | 0.03789217  | -0.00000000 | -0.07783759 | 0.05125231  |
|                |   | Y | 0.00000000  | -0.08498768 | 0.00000000  | -0.04944809 | 0.06976524  |
|                |   | Z | -0.09361360 | -0.00000000 | 0.02909482  | -0.00000000 | 0.00000000  |
| 12             | N | X | -0.00000000 | 0.06532453  | -0.00000000 | -0.07484355 | 0.07054269  |
|                |   | Y | 0.00000000  | -0.05611442 | 0.00000000  | 0.02987356  | 0.10228932  |
|                |   | Z | -0.02077772 | -0.00000000 | 0.01386677  | 0.00000000  | -0.00000000 |
| 13             | N | X | -0.00000000 | 0.14059873  | -0.00000000 | -0.07970297 | -0.03097668 |
|                |   | Y | -0.00000000 | 0.07237258  | 0.00000000  | 0.02472974  | -0.07339010 |
|                |   | Z | 0.07604902  | 0.00000000  | -0.01827870 | 0.00000000  | -0.00000000 |
| 14             | H | X | -0.00000000 | 0.03742955  | -0.00000000 | 0.15012069  | 0.01016068  |
|                |   | Y | 0.00000000  | 0.02906973  | -0.00000000 | 0.04929920  | 0.03245153  |
|                |   | Z | 0.08979261  | 0.00000000  | 0.15326246  | -0.00000000 | 0.00000000  |
| 15             | H | X | 0.00000000  | -0.09121570 | 0.00000000  | -0.01249351 | -0.06064294 |
|                |   | Y | -0.00000000 | 0.05968721  | -0.00000000 | 0.08918778  | 0.04862571  |
|                |   | Z | 0.03970088  | 0.00000000  | 0.13777777  | 0.00000000  | -0.00000000 |
| 16             | H | X | 0.00000000  | -0.11414925 | 0.00000000  | -0.05311112 | -0.06979768 |
|                |   | Y | 0.00000000  | -0.02215858 | 0.00000000  | -0.01832394 | -0.00509018 |
|                |   | Z | -0.07373600 | -0.00000000 | -0.06098616 | 0.00000000  | 0.00000000  |
| 17             | H | X | 0.00000000  | -0.05368693 | -0.00000000 | 0.03809493  | -0.04332371 |
|                |   | Y | 0.00000000  | -0.07263315 | 0.00000000  | -0.08227942 | -0.03109014 |
|                |   | Z | -0.11810344 | -0.00000000 | -0.24194115 | -0.00000000 | -0.00000000 |
| 18             | H | X | -0.06387741 | 0.04854329  | 0.01075833  | 0.05795028  | 0.05169246  |
|                |   | Y | 0.14691877  | 0.01470724  | -0.11866474 | -0.02922744 | -0.07120177 |
|                |   | Z | 0.24145458  | 0.00022136  | -0.18954389 | -0.00004097 | 0.00317970  |
| 19             | H | X | 0.06387741  | 0.04854329  | -0.01075833 | 0.05795028  | 0.05169246  |
|                |   | Y | -0.14691877 | 0.01470724  | 0.11866474  | -0.02922744 | -0.07120177 |
|                |   | Z | 0.24145458  | -0.00022136 | -0.18954389 | 0.00004097  | -0.00317970 |
| 20             | H | X | 0.08361592  | -0.02208950 | -0.04768873 | -0.02095100 | 0.14606975  |
|                |   | Y | -0.09183493 | -0.05303524 | 0.04119478  | -0.08930285 | -0.00423484 |
|                |   | Z | -0.16473835 | 0.00019293  | 0.04282035  | 0.00327132  | 0.00294014  |
| 21             | H | X | -0.08361592 | -0.02208950 | 0.04768873  | -0.02095100 | 0.14606975  |
|                |   | Y | 0.09183493  | -0.05303524 | -0.04119478 | -0.08930285 | -0.00423484 |
|                |   | Z | -0.16473835 | -0.00019293 | 0.04282035  | -0.00327132 | -0.00294014 |
| 22             | H | X | 0.02543493  | 0.04474759  | 0.00209798  | -0.12944122 | 0.01773048  |
|                |   | Y | -0.02473267 | -0.08408128 | 0.01603837  | -0.04388547 | 0.07181900  |
|                |   | Z | -0.10899272 | 0.00078088  | 0.04006382  | 0.00104900  | 0.00019936  |
| 23             | H | X | -0.02543493 | 0.04474759  | -0.00209798 | -0.12944122 | 0.01773048  |
|                |   | Y | 0.02473267  | -0.08408128 | -0.01603837 | -0.04388547 | 0.07181900  |
|                |   | Z | -0.10899272 | -0.00078088 | 0.04006382  | -0.00104900 | -0.00019936 |
| TRANS. SAYVETZ |   | X | -0.00000000 | 0.00079622  | -0.00000000 | 0.00042280  | -0.00203128 |
|                |   | Y | 0.00000000  | 0.00665663  | -0.00000000 | 0.00809281  | 0.00276786  |
|                |   | Z | 0.03941742  | -0.00000000 | -0.03772849 | -0.00000000 | -0.00000000 |

TOTAL 0.03941742 0.00670408 0.03772849 0.00810385 0.00343324

ROT. SAYVETZ X 0.01541815 -0.00000000 -0.02471342 -0.00000000 0.00000000  
Y -0.30177823 -0.00000000 -0.31404616 0.00000000 -0.00000000  
Z 0.00000000 0.06022257 -0.00000000 -0.03089026 0.00855592  
TOTAL 0.30217184 0.06022257 0.31501705 0.03089026 0.00855592

FREQUENCY: 16 17 18 19 20  
SYMMETRY: A'' A' A'' A'' A'  
REDUCED MASS: 4.43832 6.33155 2.97932 4.39204 7.40127

|    |   |   |             |             |             |             |             |
|----|---|---|-------------|-------------|-------------|-------------|-------------|
| 1  | N | X | -0.00000000 | -0.05508727 | 0.00000000  | -0.00000000 | -0.00442958 |
|    |   | Y | 0.00000000  | 0.02446963  | -0.00000000 | 0.00000000  | -0.02762571 |
|    |   | Z | 0.00048431  | -0.00000000 | -0.03805390 | 0.13223460  | 0.00000000  |
| 2  | C | X | -0.00000000 | -0.05174181 | 0.00000000  | -0.00000000 | -0.01747406 |
|    |   | Y | -0.00000000 | -0.00280891 | 0.00000000  | 0.00000000  | -0.06264757 |
|    |   | Z | 0.00270591  | 0.00000000  | 0.11439292  | -0.03285622 | 0.00000000  |
| 3  | C | X | -0.00000000 | -0.01172070 | 0.00000000  | 0.00000000  | -0.03423431 |
|    |   | Y | -0.00000000 | -0.02540113 | 0.00000000  | 0.00000000  | -0.03476039 |
|    |   | Z | -0.00233830 | -0.00000000 | -0.09752172 | -0.12795945 | -0.00000000 |
| 4  | C | X | -0.00000000 | -0.03637786 | 0.00000000  | 0.00000000  | 0.04424870  |
|    |   | Y | -0.00000000 | -0.02924122 | 0.00000000  | 0.00000000  | -0.03878044 |
|    |   | Z | 0.00056968  | -0.00000000 | -0.05128266 | 0.13049340  | 0.00000000  |
| 5  | C | X | -0.00000000 | -0.03562927 | 0.00000000  | 0.00000000  | 0.06482920  |
|    |   | Y | -0.00000000 | 0.00143311  | 0.00000000  | -0.00000000 | -0.00973600 |
|    |   | Z | 0.00220512  | 0.00000000  | 0.14416711  | -0.05388308 | -0.00000000 |
| 6  | C | X | -0.00000000 | -0.05838652 | 0.00000000  | -0.00000000 | 0.05857755  |
|    |   | Y | 0.00000000  | 0.02501514  | -0.00000000 | -0.00000000 | -0.00229591 |
|    |   | Z | -0.00258199 | -0.00000000 | -0.07811378 | -0.06930389 | -0.00000000 |
| 7  | C | X | 0.00000000  | 0.04007725  | -0.00000000 | 0.00000000  | -0.05070011 |
|    |   | Y | -0.00000000 | 0.03547834  | -0.00000000 | -0.00000000 | 0.07038798  |
|    |   | Z | -0.00280202 | -0.00000000 | -0.07086727 | -0.07454300 | -0.00000000 |
| 8  | C | X | 0.00000000  | 0.07931773  | -0.00000000 | 0.00000000  | -0.01209420 |
|    |   | Y | -0.00000000 | -0.00403874 | 0.00000000  | -0.00000000 | 0.05579181  |
|    |   | Z | 0.00817221  | -0.00000000 | 0.00625731  | 0.00087864  | 0.00000000  |
| 9  | C | X | 0.00000000  | 0.03798432  | -0.00000000 | 0.00000000  | -0.03656488 |
|    |   | Y | -0.00000000 | -0.10271740 | 0.00000000  | -0.00000000 | -0.04328419 |
|    |   | Z | -0.02683184 | 0.00000000  | 0.00766231  | 0.00694085  | 0.00000000  |
| 10 | O | X | 0.00000000  | 0.13484897  | -0.00000000 | 0.00000000  | -0.08216117 |
|    |   | Y | 0.00000000  | 0.06142528  | -0.00000000 | -0.00000000 | 0.07011657  |
|    |   | Z | 0.00207099  | 0.00000000  | 0.02952877  | 0.03430140  | 0.00000000  |
| 11 | C | X | 0.00000000  | -0.02163201 | 0.00000000  | 0.00000000  | -0.03693155 |
|    |   | Y | 0.00000000  | -0.04805521 | 0.00000000  | -0.00000000 | -0.02696230 |
|    |   | Z | -0.05178101 | 0.00000000  | 0.00165925  | 0.00145388  | 0.00000000  |
| 12 | N | X | 0.00000000  | -0.00173026 | -0.00000000 | -0.00000000 | 0.10210464  |
|    |   | Y | 0.00000000  | 0.06325678  | -0.00000000 | -0.00000000 | 0.09621870  |
|    |   | Z | 0.20401066  | -0.00000000 | -0.00664432 | -0.00432893 | -0.00000000 |
| 13 | N | X | -0.00000000 | -0.04603374 | 0.00000000  | -0.00000000 | 0.01506446  |
|    |   | Y | -0.00000000 | -0.01028750 | 0.00000000  | 0.00000000  | -0.06047248 |
|    |   | Z | -0.12202940 | 0.00000000  | 0.00317645  | 0.00179357  | 0.00000000  |
| 14 | H | X | -0.00000000 | -0.08851154 | 0.00000000  | -0.00000000 | -0.01837351 |
|    |   | Y | -0.00000000 | -0.01439709 | 0.00000000  | 0.00000000  | -0.06225556 |
|    |   | Z | 0.00711063  | 0.00000000  | 0.32807837  | -0.03153483 | 0.00000000  |
| 15 | H | X | -0.00000000 | -0.03194626 | 0.00000000  | 0.00000000  | 0.09212336  |
|    |   | Y | -0.00000000 | -0.03162085 | 0.00000000  | 0.00000000  | -0.08393013 |
|    |   | Z | 0.00220896  | -0.00000000 | -0.11662473 | 0.33783840  | 0.00000000  |
| 16 | H | X | 0.00000000  | -0.00317544 | 0.00000000  | -0.00000000 | 0.07053756  |
|    |   | Y | 0.00000000  | 0.01290094  | -0.00000000 | -0.00000000 | -0.00862743 |
|    |   | Z | 0.00459536  | 0.00000000  | 0.28371098  | -0.04435446 | 0.00000000  |

|    |   |   |             |             |             |             |             |
|----|---|---|-------------|-------------|-------------|-------------|-------------|
| 17 | H | X | -0.00000000 | -0.05750288 | 0.00000000  | -0.00000000 | 0.06598874  |
|    |   | Y | 0.00000000  | 0.03169811  | -0.00000000 | 0.00000000  | 0.03501518  |
|    |   | Z | -0.00706632 | -0.00000000 | -0.23187298 | -0.15182445 | -0.00000000 |
| 18 | H | X | -0.01644501 | 0.13716137  | 0.03021492  | 0.02705450  | 0.02972040  |
|    |   | Y | 0.03620698  | 0.00723080  | 0.07641811  | 0.08026472  | 0.06018897  |
|    |   | Z | 0.03689896  | -0.00028664 | 0.05826088  | 0.05642638  | -0.00198114 |
| 19 | H | X | 0.01644501  | 0.13716137  | -0.03021492 | -0.02705450 | 0.02972040  |
|    |   | Y | -0.03620698 | 0.00723080  | -0.07641811 | -0.08026472 | 0.06018897  |
|    |   | Z | 0.03689896  | 0.00028664  | 0.05826088  | 0.05642638  | 0.00198114  |
| 20 | H | X | 0.00860949  | 0.03233643  | -0.00056533 | -0.00349888 | -0.07255566 |
|    |   | Y | 0.00861229  | -0.09560094 | 0.00165186  | 0.00441553  | -0.04119907 |
|    |   | Z | -0.02104511 | 0.00400215  | 0.00854047  | 0.01008636  | 0.00348388  |
| 21 | H | X | -0.00860949 | 0.03233643  | 0.00056533  | 0.00349888  | -0.07255566 |
|    |   | Y | -0.00861229 | -0.09560094 | -0.00165186 | -0.00441553 | -0.04119907 |
|    |   | Z | -0.02104511 | -0.00400215 | 0.00854047  | 0.01008636  | -0.00348388 |
| 22 | H | X | 0.14016492  | -0.08762900 | -0.00687855 | -0.00537770 | -0.07334198 |
|    |   | Y | -0.17580632 | -0.03980352 | -0.00114019 | -0.00274738 | -0.02331480 |
|    |   | Z | -0.16880614 | 0.00260427  | 0.00066807  | -0.00060257 | 0.00280049  |
| 23 | H | X | -0.14016492 | -0.08762900 | 0.00687855  | 0.00537770  | -0.07334198 |
|    |   | Y | 0.17580632  | -0.03980352 | 0.00114019  | 0.00274738  | -0.02331480 |
|    |   | Z | -0.16880614 | -0.00260427 | 0.00066807  | -0.00060257 | -0.00280049 |

|                |   |             |             |             |             |             |
|----------------|---|-------------|-------------|-------------|-------------|-------------|
| TRANS. SAYVETZ | X | 0.00000000  | 0.00182236  | -0.00000000 | 0.00000000  | -0.00183606 |
|                | Y | -0.00000000 | 0.00305877  | 0.00000000  | -0.00000000 | -0.00167671 |
|                | Z | 0.01431342  | -0.00000000 | 0.00846597  | -0.01667287 | -0.00000000 |
| TOTAL          |   | 0.01431342  | 0.00356049  | 0.00846597  | 0.01667287  | 0.00248646  |

|              |   |             |             |             |             |             |
|--------------|---|-------------|-------------|-------------|-------------|-------------|
| ROT. SAYVETZ | X | -0.02847865 | 0.00000000  | -0.08180053 | 0.10410512  | 0.00000000  |
|              | Y | 0.02841791  | -0.00000000 | -0.10913605 | -0.00120569 | -0.00000000 |
|              | Z | -0.00000000 | 0.00058018  | 0.00000000  | 0.00000000  | -0.02261354 |
| TOTAL        |   | 0.04023197  | 0.00058018  | 0.13638916  | 0.10411211  | 0.02261354  |

|               | 21      | 22      | 23      | 24      | 25      |
|---------------|---------|---------|---------|---------|---------|
| FREQUENCY:    | 512.28  | 586.12  | 633.69  | 663.72  | 684.84  |
| SYMMETRY:     | A'      | A''     | A'      | A'      | A''     |
| REDUCED MASS: | 6.17425 | 2.53248 | 7.69490 | 6.62900 | 3.54877 |

|   |   |   |             |             |             |             |             |
|---|---|---|-------------|-------------|-------------|-------------|-------------|
| 1 | N | X | 0.02527949  | 0.00000000  | 0.12416818  | 0.00141194  | 0.00000000  |
|   |   | Y | 0.01475880  | 0.00000000  | 0.09019967  | 0.00352401  | 0.00000000  |
|   |   | Z | -0.00000000 | 0.04750538  | -0.00000000 | -0.00000000 | 0.11803999  |
| 2 | C | X | 0.03181620  | 0.00000000  | 0.06897324  | 0.00527764  | 0.00000000  |
|   |   | Y | 0.04726725  | 0.00000000  | -0.07934735 | 0.01847123  | 0.00000000  |
|   |   | Z | 0.00000000  | -0.02332127 | 0.00000000  | 0.00000000  | -0.10302459 |
| 3 | C | X | 0.01903514  | 0.00000000  | 0.01031180  | 0.01099819  | 0.00000000  |
|   |   | Y | 0.03220648  | -0.00000000 | -0.06349906 | 0.00372238  | -0.00000000 |
|   |   | Z | -0.00000000 | -0.10918850 | -0.00000000 | -0.00000000 | 0.10226858  |
| 4 | C | X | -0.02123476 | 0.00000000  | -0.10321026 | 0.00280679  | 0.00000000  |
|   |   | Y | 0.04682321  | -0.00000000 | -0.09199245 | 0.00728370  | -0.00000000 |
|   |   | Z | 0.00000000  | -0.02503424 | 0.00000000  | 0.00000000  | -0.07918913 |
| 5 | C | X | -0.03393478 | -0.00000000 | -0.07291475 | -0.00184949 | -0.00000000 |
|   |   | Y | 0.01575468  | -0.00000000 | 0.08165604  | -0.00714472 | -0.00000000 |
|   |   | Z | 0.00000000  | 0.03114601  | -0.00000000 | 0.00000000  | 0.10971744  |
| 6 | C | X | -0.01703475 | -0.00000000 | -0.00749287 | -0.00823667 | -0.00000000 |
|   |   | Y | -0.00545774 | 0.00000000  | 0.05454430  | -0.00338815 | 0.00000000  |
|   |   | Z | -0.00000000 | -0.04092693 | 0.00000000  | 0.00000000  | -0.09576913 |
| 7 | C | X | 0.00430668  | 0.00000000  | 0.01553567  | 0.00306282  | 0.00000000  |
|   |   | Y | -0.06278815 | -0.00000000 | 0.00596758  | -0.02949487 | -0.00000000 |
|   |   | Z | 0.00000000  | 0.17371488  | -0.00000000 | -0.00000000 | -0.00574800 |
| 8 | C | X | -0.09090683 | 0.00000000  | 0.00416280  | -0.04115313 | 0.00000000  |
|   |   | Y | -0.00981731 | 0.00000000  | 0.01396927  | 0.05229102  | 0.00000000  |

|    |   |   |             |             |             |             |             |
|----|---|---|-------------|-------------|-------------|-------------|-------------|
|    |   | Z | 0.00000000  | 0.04381048  | 0.00000000  | -0.00000000 | -0.00708775 |
| 9  | C | X | -0.08004737 | 0.00000000  | -0.00599125 | -0.04319824 | -0.00000000 |
|    |   | Y | -0.00625847 | 0.00000000  | 0.00231917  | 0.00902354  | 0.00000000  |
|    |   | Z | 0.00000000  | -0.00949292 | 0.00000000  | 0.00000000  | -0.00102269 |
| 10 | O | X | 0.09257265  | -0.00000000 | -0.02977527 | 0.00187708  | -0.00000000 |
|    |   | Y | -0.04618131 | -0.00000000 | -0.00731914 | -0.03656875 | -0.00000000 |
|    |   | Z | -0.00000000 | -0.05478863 | -0.00000000 | -0.00000000 | 0.00449029  |
| 11 | C | X | -0.08727747 | 0.00000000  | -0.00182244 | 0.18081427  | -0.00000000 |
|    |   | Y | -0.00566736 | 0.00000000  | -0.00694987 | -0.13328569 | -0.00000000 |
|    |   | Z | 0.00000000  | -0.00687024 | 0.00000000  | -0.00000000 | 0.00024918  |
| 12 | N | X | 0.10919522  | -0.00000000 | 0.00172418  | -0.01314740 | 0.00000000  |
|    |   | Y | 0.05517858  | -0.00000000 | 0.00417384  | 0.09544471  | 0.00000000  |
|    |   | Z | -0.00000000 | 0.00542399  | -0.00000000 | -0.00000000 | -0.00016307 |
| 13 | N | X | 0.04812734  | -0.00000000 | -0.00120019 | -0.06801259 | 0.00000000  |
|    |   | Y | -0.06277088 | -0.00000000 | -0.00074209 | 0.01935199  | -0.00000000 |
|    |   | Z | 0.00000000  | -0.00158952 | -0.00000000 | -0.00000000 | 0.00003621  |
| 14 | H | X | 0.05070610  | -0.00000000 | -0.02936888 | 0.00849386  | -0.00000000 |
|    |   | Y | 0.05187896  | -0.00000000 | -0.10649910 | 0.01952362  | 0.00000000  |
|    |   | Z | 0.00000000  | 0.08005037  | 0.00000000  | 0.00000000  | -0.28959374 |
| 15 | H | X | -0.05746581 | -0.00000000 | -0.06306385 | -0.01467526 | -0.00000000 |
|    |   | Y | 0.07975866  | 0.00000000  | -0.12731794 | 0.02245420  | -0.00000000 |
|    |   | Z | 0.00000000  | 0.07734539  | 0.00000000  | -0.00000000 | -0.18262588 |
| 16 | H | X | -0.05497283 | 0.00000000  | 0.01842249  | -0.00345146 | 0.00000000  |
|    |   | Y | 0.00907331  | 0.00000000  | 0.11378443  | -0.00759354 | -0.00000000 |
|    |   | Z | 0.00000000  | 0.14171216  | -0.00000000 | -0.00000000 | -0.05873568 |
| 17 | H | X | -0.02316506 | -0.00000000 | -0.03336262 | -0.00857553 | -0.00000000 |
|    |   | Y | -0.03755936 | -0.00000000 | -0.08777539 | -0.00425450 | 0.00000000  |
|    |   | Z | -0.00000000 | -0.05768334 | -0.00000000 | 0.00000000  | -0.30592713 |
| 18 | H | X | -0.13807578 | -0.09597727 | -0.00338012 | -0.07302832 | 0.00574798  |
|    |   | Y | -0.02415351 | -0.31933735 | 0.01221289  | 0.04032682  | 0.03810536  |
|    |   | Z | -0.00302189 | -0.18058292 | -0.00022272 | -0.00336230 | 0.02052902  |
| 19 | H | X | -0.13807578 | 0.09597727  | -0.00338012 | -0.07302832 | -0.00574798 |
|    |   | Y | -0.02415351 | 0.31933735  | 0.01221289  | 0.04032682  | -0.03810536 |
|    |   | Z | 0.00302189  | -0.18058292 | 0.00022272  | 0.00336230  | 0.02052902  |
| 20 | H | X | -0.10403139 | 0.04330484  | -0.01698758 | -0.11889745 | -0.00791049 |
|    |   | Y | -0.00653278 | -0.06182222 | 0.00094281  | -0.01351002 | 0.01738524  |
|    |   | Z | 0.00009772  | -0.05780814 | 0.00003121  | -0.00897495 | 0.01247120  |
| 21 | H | X | -0.10403139 | -0.04330484 | -0.01698758 | -0.11889745 | 0.00791049  |
|    |   | Y | -0.00653278 | 0.06182222  | 0.00094281  | -0.01351002 | -0.01738524 |
|    |   | Z | -0.00009772 | -0.05780814 | -0.00003121 | 0.00897495  | 0.01247120  |
| 22 | H | X | -0.07861805 | 0.00558381  | -0.00587284 | 0.09355806  | 0.00216890  |
|    |   | Y | -0.01345555 | 0.00179022  | -0.00592484 | -0.08326664 | 0.00484362  |
|    |   | Z | -0.00161515 | -0.00570547 | 0.00057711  | 0.02602344  | 0.00376906  |
| 23 | H | X | -0.07861805 | -0.00558381 | -0.00587284 | 0.09355806  | -0.00216890 |
|    |   | Y | -0.01345555 | -0.00179022 | -0.00592484 | -0.08326664 | -0.00484362 |
|    |   | Z | 0.00161515  | -0.00570547 | -0.00057711 | -0.02602344 | 0.00376906  |

|                |  |       |             |             |             |             |             |
|----------------|--|-------|-------------|-------------|-------------|-------------|-------------|
| TRANS. SAYVETZ |  | X     | 0.00231365  | 0.00000000  | -0.00066114 | -0.00105331 | -0.00000000 |
|                |  | Y     | 0.00142219  | -0.00000000 | -0.00078948 | -0.00173696 | -0.00000000 |
|                |  | Z     | -0.00000000 | -0.00007586 | -0.00000000 | -0.00000000 | -0.00162250 |
|                |  | TOTAL | 0.00271581  | 0.00007586  | 0.00102975  | 0.00203138  | 0.00162250  |

|              |  |       |             |             |             |             |             |
|--------------|--|-------|-------------|-------------|-------------|-------------|-------------|
| ROT. SAYVETZ |  | X     | -0.00000000 | -0.00205177 | -0.00000000 | -0.00000000 | -0.01905495 |
|              |  | Y     | 0.00000000  | -0.02206594 | -0.00000000 | -0.00000000 | 0.02551415  |
|              |  | Z     | -0.00892648 | 0.00000000  | -0.00271430 | 0.00837728  | 0.00000000  |
|              |  | TOTAL | 0.00892648  | 0.02216112  | 0.00271430  | 0.00837728  | 0.03184435  |

|            |  |        |        |        |        |        |
|------------|--|--------|--------|--------|--------|--------|
|            |  | 26     | 27     | 28     | 29     | 30     |
| FREQUENCY: |  | 696.50 | 768.21 | 797.90 | 816.18 | 892.29 |
| SYMMETRY:  |  | A'     | A''    | A''    | A'     | A''    |

| REDUCED MASS: |   | 6.82689 | 1.14422     | 1.30041     | 5.83564     | 1.46648     |             |
|---------------|---|---------|-------------|-------------|-------------|-------------|-------------|
| 1             | N | X       | 0.01138890  | 0.00000000  | -0.00000000 | -0.04362848 | -0.00000000 |
|               |   | Y       | -0.04502310 | 0.00000000  | -0.00000000 | -0.05850857 | -0.00000000 |
|               |   | Z       | 0.00000000  | 0.00963193  | 0.02644966  | -0.00000000 | -0.00480866 |
| 2             | C | X       | -0.00560192 | 0.00000000  | -0.00000000 | -0.02805269 | -0.00000000 |
|               |   | Y       | -0.07929129 | 0.00000000  | -0.00000000 | -0.05562450 | -0.00000000 |
|               |   | Z       | -0.00000000 | -0.00947218 | -0.02379387 | 0.00000000  | -0.00469596 |
| 3             | C | X       | -0.10220175 | 0.00000000  | 0.00000000  | -0.02541685 | 0.00000000  |
|               |   | Y       | 0.00914505  | -0.00000000 | 0.00000000  | 0.00055925  | -0.00000000 |
|               |   | Z       | 0.00000000  | -0.00062526 | 0.06908666  | -0.00000000 | -0.04126884 |
| 4             | C | X       | -0.02818677 | 0.00000000  | -0.00000000 | -0.02073773 | -0.00000000 |
|               |   | Y       | 0.07033338  | -0.00000000 | 0.00000000  | 0.06496976  | 0.00000000  |
|               |   | Z       | -0.00000000 | -0.03372794 | -0.08791127 | 0.00000000  | -0.00114641 |
| 5             | C | X       | -0.00846232 | 0.00000000  | -0.00000000 | -0.02601633 | -0.00000000 |
|               |   | Y       | 0.10811890  | -0.00000000 | 0.00000000  | 0.09780492  | 0.00000000  |
|               |   | Z       | 0.00000000  | -0.01245594 | -0.04204749 | 0.00000000  | 0.02388131  |
| 6             | C | X       | 0.09880662  | -0.00000000 | -0.00000000 | 0.05946557  | 0.00000000  |
|               |   | Y       | -0.00722559 | 0.00000000  | 0.00000000  | -0.00558440 | 0.00000000  |
|               |   | Z       | -0.00000000 | -0.01643784 | -0.05166579 | 0.00000000  | 0.01455460  |
| 7             | C | X       | -0.08507181 | 0.00000000  | 0.00000000  | 0.05542932  | 0.00000000  |
|               |   | Y       | -0.00263702 | 0.00000000  | -0.00000000 | -0.05258014 | 0.00000000  |
|               |   | Z       | 0.00000000  | 0.05228880  | -0.01557112 | -0.00000000 | 0.10250412  |
| 8             | C | X       | -0.05539517 | -0.00000000 | 0.00000000  | 0.09709269  | 0.00000000  |
|               |   | Y       | -0.08708780 | 0.00000000  | 0.00000000  | 0.12253920  | 0.00000000  |
|               |   | Z       | -0.00000000 | -0.02281974 | -0.02099173 | 0.00000000  | -0.08409198 |
| 9             | C | X       | 0.02179284  | -0.00000000 | -0.00000000 | 0.00543748  | -0.00000000 |
|               |   | Y       | -0.01927688 | -0.00000000 | 0.00000000  | 0.02654304  | 0.00000000  |
|               |   | Z       | -0.00000000 | -0.05578392 | 0.02059216  | -0.00000000 | -0.02281297 |
| 10            | O | X       | 0.06712142  | -0.00000000 | -0.00000000 | -0.00946690 | -0.00000000 |
|               |   | Y       | 0.03958206  | 0.00000000  | -0.00000000 | -0.09335659 | -0.00000000 |
|               |   | Z       | -0.00000000 | -0.01265112 | 0.00329046  | 0.00000000  | -0.02196254 |
| 11            | C | X       | 0.05844444  | 0.00000000  | 0.00000000  | -0.04885536 | -0.00000000 |
|               |   | Y       | 0.01151825  | -0.00000000 | -0.00000000 | -0.02364337 | -0.00000000 |
|               |   | Z       | 0.00000000  | -0.04514767 | 0.02919818  | -0.00000000 | 0.07907992  |
| 12            | N | X       | -0.00965853 | -0.00000000 | 0.00000000  | 0.00072994  | 0.00000000  |
|               |   | Y       | 0.00173616  | 0.00000000  | 0.00000000  | -0.00212971 | 0.00000000  |
|               |   | Z       | 0.00000000  | 0.01937487  | -0.01149470 | 0.00000000  | -0.02720654 |
| 13            | N | X       | -0.00858007 | -0.00000000 | -0.00000000 | 0.00151123  | 0.00000000  |
|               |   | Y       | 0.00696534  | 0.00000000  | 0.00000000  | -0.00157674 | -0.00000000 |
|               |   | Z       | -0.00000000 | -0.00351951 | 0.00223301  | -0.00000000 | 0.00516696  |
| 14            | H | X       | 0.04897114  | -0.00000000 | -0.00000000 | -0.00986401 | 0.00000000  |
|               |   | Y       | -0.06635753 | 0.00000000  | -0.00000000 | -0.05289195 | -0.00000000 |
|               |   | Z       | -0.00000000 | 0.07169687  | 0.11349737  | -0.00000000 | 0.06244848  |
| 15            | H | X       | 0.05337563  | -0.00000000 | -0.00000000 | 0.02223786  | 0.00000000  |
|               |   | Y       | -0.00244913 | 0.00000000  | 0.00000000  | 0.03099676  | -0.00000000 |
|               |   | Z       | -0.00000000 | 0.18302039  | 0.47019686  | -0.00000000 | 0.01541466  |
| 16            | H | X       | -0.10402331 | 0.00000000  | -0.00000000 | -0.12386065 | -0.00000000 |
|               |   | Y       | 0.07616330  | -0.00000000 | -0.00000000 | 0.06687372  | 0.00000000  |
|               |   | Z       | 0.00000000  | 0.19212083  | 0.55267965  | -0.00000000 | -0.19046842 |
| 17            | H | X       | 0.09670845  | -0.00000000 | -0.00000000 | 0.06103098  | 0.00000000  |
|               |   | Y       | -0.02574259 | 0.00000000  | 0.00000000  | 0.00033265  | 0.00000000  |
|               |   | Z       | -0.00000000 | 0.10390848  | 0.30201999  | -0.00000000 | -0.06758326 |
| 18            | H | X       | -0.04018300 | -0.12141259 | 0.03293724  | 0.11310246  | -0.18155064 |
|               |   | Y       | -0.07587488 | 0.14462613  | 0.05220953  | 0.11440788  | 0.26251403  |
|               |   | Z       | 0.00556391  | 0.10280710  | 0.01396216  | -0.00834767 | 0.13819724  |
| 19            | H | X       | -0.04018300 | 0.12141259  | -0.03293724 | 0.11310246  | 0.18155064  |
|               |   | Y       | -0.07587488 | -0.14462613 | -0.05220953 | 0.11440788  | -0.26251403 |
|               |   | Z       | -0.00556391 | 0.10280710  | 0.01396216  | 0.00834767  | 0.13819724  |
| 20            | H | X       | 0.07645294  | -0.01665288 | -0.04216963 | -0.06565731 | -0.27813156 |

|                |   |       |             |             |             |             |             |
|----------------|---|-------|-------------|-------------|-------------|-------------|-------------|
|                |   | Y     | -0.01647359 | 0.39451402  | -0.12825340 | 0.02379417  | 0.04988812  |
|                |   | Z     | -0.00233182 | 0.23685181  | -0.07057788 | 0.00342415  | 0.03809035  |
| 21             | H | X     | 0.07645294  | 0.01665288  | 0.04216963  | -0.06565731 | 0.27813156  |
|                |   | Y     | -0.01647359 | -0.39451402 | 0.12825340  | 0.02379417  | -0.04988812 |
|                |   | Z     | 0.00233182  | 0.23685181  | -0.07057788 | -0.00342415 | 0.03809035  |
| 22             | H | X     | 0.06131837  | 0.13198520  | -0.06597213 | -0.06648265 | -0.10359312 |
|                |   | Y     | 0.01858067  | 0.29257778  | -0.14709781 | -0.03030682 | -0.27800305 |
|                |   | Z     | 0.00336624  | 0.16489742  | -0.07626166 | -0.00358430 | -0.11877399 |
| 23             | H | X     | 0.06131837  | -0.13198520 | 0.06597213  | -0.06648265 | 0.10359312  |
|                |   | Y     | 0.01858067  | -0.29257778 | 0.14709781  | -0.03030682 | 0.27800305  |
|                |   | Z     | -0.00336624 | 0.16489742  | -0.07626166 | 0.00358430  | -0.11877399 |
| TRANS. SAYVETZ |   | X     | -0.00034617 | -0.00000000 | -0.00000000 | -0.00004189 | 0.00000000  |
|                |   | Y     | 0.00044186  | 0.00000000  | 0.00000000  | -0.00148184 | 0.00000000  |
|                |   | Z     | -0.00000000 | -0.00356833 | -0.00212136 | -0.00000000 | -0.00087253 |
|                |   | TOTAL | 0.00056131  | 0.00356833  | 0.00212136  | 0.00148243  | 0.00087253  |

|              |  |       |             |             |             |             |             |
|--------------|--|-------|-------------|-------------|-------------|-------------|-------------|
| ROT. SAYVETZ |  | X     | 0.00000000  | 0.01794934  | 0.04287226  | -0.00000000 | -0.01391582 |
|              |  | Y     | 0.00000000  | -0.02180331 | 0.00345059  | -0.00000000 | -0.01062978 |
|              |  | Z     | -0.00298944 | -0.00000000 | -0.00000000 | 0.00227273  | 0.00000000  |
|              |  | TOTAL | 0.00298944  | 0.02824116  | 0.04301090  | 0.00227273  | 0.01751120  |

|               | 31      | 32      | 33      | 34      | 35      |
|---------------|---------|---------|---------|---------|---------|
| FREQUENCY:    | 936.52  | 949.78  | 998.76  | 1008.89 | 1054.58 |
| SYMMETRY:     | A''     | A''     | A''     | A'      | A'      |
| REDUCED MASS: | 1.21307 | 1.32923 | 1.44012 | 5.34091 | 4.48127 |

|    |   |   |             |             |             |             |             |
|----|---|---|-------------|-------------|-------------|-------------|-------------|
| 1  | N | X | -0.00000000 | -0.00000000 | -0.00000000 | -0.07547500 | -0.02758856 |
|    |   | Y | -0.00000000 | -0.00000000 | -0.00000000 | -0.08092219 | -0.05295466 |
|    |   | Z | 0.01901664  | 0.02147009  | -0.00058910 | 0.00000000  | 0.00000000  |
| 2  | C | X | -0.00000000 | 0.00000000  | -0.00000000 | -0.00401286 | 0.00564890  |
|    |   | Y | -0.00000000 | 0.00000000  | -0.00000000 | -0.01675605 | 0.15941879  |
|    |   | Z | 0.00901576  | -0.10132770 | 0.10357373  | -0.00000000 | 0.00000000  |
| 3  | C | X | -0.00000000 | 0.00000000  | 0.00000000  | 0.09493566  | -0.00426272 |
|    |   | Y | 0.00000000  | 0.00000000  | -0.00000000 | -0.00208697 | 0.00114292  |
|    |   | Z | -0.00420653 | 0.01995297  | -0.03389906 | 0.00000000  | 0.00000000  |
| 4  | C | X | 0.00000000  | -0.00000000 | -0.00000000 | -0.01731256 | -0.09368846 |
|    |   | Y | 0.00000000  | -0.00000000 | -0.00000000 | -0.02710695 | -0.12589630 |
|    |   | Z | 0.08241432  | 0.06191011  | 0.00564778  | -0.00000000 | 0.00000000  |
| 5  | C | X | 0.00000000  | -0.00000000 | -0.00000000 | -0.02088933 | 0.00770332  |
|    |   | Y | 0.00000000  | -0.00000000 | 0.00000000  | 0.08179843  | 0.04079816  |
|    |   | Z | -0.08325467 | 0.02785191  | 0.04555607  | -0.00000000 | 0.00000000  |
| 6  | C | X | -0.00000000 | -0.00000000 | -0.00000000 | 0.01446985  | 0.09688395  |
|    |   | Y | 0.00000000  | -0.00000000 | 0.00000000  | 0.02227747  | -0.01577089 |
|    |   | Z | -0.01476398 | -0.07838304 | -0.11506866 | 0.00000000  | -0.00000000 |
| 7  | C | X | 0.00000000  | 0.00000000  | 0.00000000  | 0.14373153  | -0.03422069 |
|    |   | Y | -0.00000000 | 0.00000000  | 0.00000000  | 0.06539588  | -0.01705722 |
|    |   | Z | 0.02182729  | -0.00527102 | 0.00629688  | -0.00000000 | -0.00000000 |
| 8  | C | X | 0.00000000  | 0.00000000  | 0.00000000  | -0.00947001 | -0.01713446 |
|    |   | Y | 0.00000000  | 0.00000000  | -0.00000000 | -0.09623714 | 0.03637394  |
|    |   | Z | -0.01042190 | -0.00135167 | 0.00134757  | -0.00000000 | 0.00000000  |
| 9  | C | X | -0.00000000 | 0.00000000  | -0.00000000 | -0.04600231 | 0.01992565  |
|    |   | Y | -0.00000000 | 0.00000000  | 0.00000000  | 0.03498904  | -0.03071853 |
|    |   | Z | -0.00920153 | 0.00066828  | -0.00428302 | 0.00000000  | -0.00000000 |
| 10 | O | X | 0.00000000  | -0.00000000 | -0.00000000 | -0.03207859 | 0.00703251  |
|    |   | Y | -0.00000000 | -0.00000000 | 0.00000000  | 0.03554377  | -0.00852584 |
|    |   | Z | -0.00399079 | 0.00123233  | -0.00120001 | 0.00000000  | -0.00000000 |
| 11 | C | X | 0.00000000  | -0.00000000 | -0.00000000 | 0.00442666  | 0.00348715  |
|    |   | Y | 0.00000000  | -0.00000000 | -0.00000000 | -0.01456518 | 0.01428920  |
|    |   | Z | 0.01428680  | -0.00143009 | 0.00437334  | -0.00000000 | 0.00000000  |

|                |   |       |             |             |             |             |             |
|----------------|---|-------|-------------|-------------|-------------|-------------|-------------|
| 12             | N | X     | -0.00000000 | 0.00000000  | 0.00000000  | 0.00653615  | -0.00319407 |
|                |   | Y     | 0.00000000  | 0.00000000  | 0.00000000  | 0.00950450  | -0.00510740 |
|                |   | Z     | -0.00484390 | 0.00036495  | -0.00139800 | 0.00000000  | 0.00000000  |
| 13             | N | X     | -0.00000000 | 0.00000000  | -0.00000000 | -0.00008023 | 0.00044331  |
|                |   | Y     | 0.00000000  | -0.00000000 | -0.00000000 | -0.00255755 | 0.00112856  |
|                |   | Z     | 0.00087860  | -0.00007547 | 0.00024444  | 0.00000000  | 0.00000000  |
| 14             | H | X     | -0.00000000 | 0.00000000  | -0.00000000 | -0.00434861 | 0.16866257  |
|                |   | Y     | -0.00000000 | 0.00000000  | -0.00000000 | -0.01902745 | 0.21188103  |
|                |   | Z     | -0.21119248 | 0.60131533  | -0.52624639 | 0.00000000  | -0.00000000 |
| 15             | H | X     | 0.00000000  | -0.00000000 | -0.00000000 | -0.02345829 | -0.02589837 |
|                |   | Y     | 0.00000000  | -0.00000000 | 0.00000000  | -0.01626535 | -0.19709126 |
|                |   | Z     | -0.60565146 | -0.33504508 | -0.03003077 | -0.00000000 | 0.00000000  |
| 16             | H | X     | -0.00000000 | 0.00000000  | 0.00000000  | 0.02212211  | 0.10979341  |
|                |   | Y     | 0.00000000  | 0.00000000  | 0.00000000  | 0.10081389  | 0.07201986  |
|                |   | Z     | 0.61297645  | -0.14676077 | -0.16624406 | 0.00000000  | 0.00000000  |
| 17             | H | X     | -0.00000000 | -0.00000000 | -0.00000000 | 0.02014716  | 0.11008754  |
|                |   | Y     | -0.00000000 | -0.00000000 | 0.00000000  | 0.05806224  | 0.02681918  |
|                |   | Z     | -0.04800645 | 0.48395457  | 0.59959544  | -0.00000000 | 0.00000000  |
| 18             | H | X     | -0.03555155 | 0.01725955  | -0.02040757 | -0.16743721 | 0.02443930  |
|                |   | Y     | 0.03880669  | 0.00710283  | -0.00295903 | -0.12899591 | 0.04691314  |
|                |   | Z     | 0.02333254  | 0.00135942  | 0.00200249  | 0.00097285  | 0.00053886  |
| 19             | H | X     | 0.03555155  | -0.01725955 | 0.02040757  | -0.16743721 | 0.02443930  |
|                |   | Y     | -0.03880669 | -0.00710283 | 0.00295903  | -0.12899591 | 0.04691314  |
|                |   | Z     | 0.02333254  | 0.00135942  | 0.00200249  | -0.00097285 | -0.00053886 |
| 20             | H | X     | -0.05500860 | 0.00490028  | -0.01620233 | -0.07049406 | 0.04090789  |
|                |   | Y     | 0.02427917  | -0.00275603 | 0.01141237  | 0.02243231  | -0.02416338 |
|                |   | Z     | 0.01350905  | -0.00188036 | 0.00558356  | -0.00724551 | 0.00361592  |
| 21             | H | X     | 0.05500860  | -0.00490028 | 0.01620233  | -0.07049406 | 0.04090789  |
|                |   | Y     | -0.02427917 | 0.00275603  | -0.01141237 | 0.02243231  | -0.02416338 |
|                |   | Z     | 0.01350905  | -0.00188036 | 0.00558356  | 0.00724551  | -0.00361592 |
| 22             | H | X     | -0.01375022 | 0.00198530  | -0.00271586 | 0.01293249  | 0.00126572  |
|                |   | Y     | -0.04633011 | 0.00412037  | -0.01279959 | -0.00708616 | 0.01113478  |
|                |   | Z     | -0.01849454 | 0.00151952  | -0.00461317 | 0.00517108  | -0.00253460 |
| 23             | H | X     | 0.01375022  | -0.00198530 | 0.00271586  | 0.01293249  | 0.00126572  |
|                |   | Y     | 0.04633011  | -0.00412037 | 0.01279959  | -0.00708616 | 0.01113478  |
|                |   | Z     | -0.01849454 | 0.00151952  | -0.00461317 | -0.00517108 | 0.00253460  |
| TRANS. SAYVETZ |   | X     | -0.00000000 | 0.00000000  | -0.00000000 | 0.00000319  | -0.00049608 |
|                |   | Y     | 0.00000000  | -0.00000000 | -0.00000000 | 0.00061369  | 0.00016428  |
|                |   | Z     | -0.00158442 | 0.00604765  | 0.00104370  | -0.00000000 | 0.00000000  |
|                |   | TOTAL | 0.00158442  | 0.00604765  | 0.00104370  | 0.00061370  | 0.00052258  |
| ROT. SAYVETZ   |   | X     | -0.01321999 | -0.02341214 | 0.01326455  | 0.00000000  | -0.00000000 |
|                |   | Y     | 0.03523513  | -0.02285812 | 0.01789102  | -0.00000000 | 0.00000000  |
|                |   | Z     | -0.00000000 | -0.00000000 | -0.00000000 | 0.00253029  | 0.00045312  |
|                |   | TOTAL | 0.03763353  | 0.03272036  | 0.02227188  | 0.00253029  | 0.00045312  |
|                |   |       | 36          | 37          | 38          | 39          | 40          |
| FREQUENCY:     |   |       | 1060.39     | 1089.40     | 1106.87     | 1109.09     | 1177.80     |
| SYMMETRY:      |   |       | A'          | A'          | A'          | A''         | A'          |
| REDUCED MASS:  |   |       | 3.09616     | 2.66687     | 3.24992     | 1.73494     | 1.49067     |
| 1              | N | X     | 0.00218637  | 0.01221685  | 0.01857253  | 0.00000000  | -0.04001663 |
|                |   | Y     | 0.01049796  | 0.07639309  | -0.01164332 | -0.00000000 | -0.00909390 |
|                |   | Z     | 0.00000000  | 0.00000000  | 0.00000000  | -0.00149840 | 0.00000000  |
| 2              | C | X     | -0.00557890 | -0.05913338 | 0.01193846  | 0.00000000  | 0.06314576  |
|                |   | Y     | 0.00065777  | 0.01274670  | 0.03301267  | 0.00000000  | -0.06049102 |
|                |   | Z     | 0.00000000  | -0.00000000 | 0.00000000  | -0.00382254 | -0.00000000 |
| 3              | C | X     | -0.00851494 | -0.01216637 | -0.05470558 | -0.00000000 | -0.01743082 |
|                |   | Y     | 0.00259932  | 0.00463667  | 0.01287568  | 0.00000000  | 0.01813681  |



|    |   |   |             |             |             |             |             |
|----|---|---|-------------|-------------|-------------|-------------|-------------|
|    |   | Z | 0.00000000  | -0.00000000 | -0.00000000 | 0.02663638  | -0.00000000 |
| 4  | C | X | -0.01100075 | -0.06717716 | 0.00968637  | 0.00000000  | -0.09623465 |
|    |   | Y | -0.00324445 | -0.00388511 | -0.02499176 | -0.00000000 | 0.02457564  |
|    |   | Z | 0.00000000  | 0.00000000  | 0.00000000  | -0.00305603 | 0.00000000  |
| 5  | C | X | 0.00531066  | -0.01142172 | 0.01029214  | 0.00000000  | 0.07600869  |
|    |   | Y | -0.01734518 | -0.09853058 | 0.01356196  | 0.00000000  | -0.04077076 |
|    |   | Z | -0.00000000 | 0.00000000  | 0.00000000  | -0.00333159 | -0.00000000 |
| 6  | C | X | 0.01933462  | 0.14853340  | -0.03500481 | -0.00000000 | -0.00490797 |
|    |   | Y | 0.00084760  | -0.00507743 | -0.00938999 | -0.00000000 | 0.03007385  |
|    |   | Z | 0.00000000  | 0.00000000  | -0.00000000 | 0.00142711  | 0.00000000  |
| 7  | C | X | 0.00284476  | 0.03359553  | -0.05851641 | -0.00000000 | -0.01758933 |
|    |   | Y | 0.00489133  | 0.01090141  | -0.01413459 | -0.00000000 | -0.00561436 |
|    |   | Z | 0.00000000  | 0.00000000  | 0.00000000  | -0.10439270 | -0.00000000 |
| 8  | C | X | -0.04966131 | 0.04662697  | 0.10967737  | 0.00000000  | 0.01868642  |
|    |   | Y | 0.00831196  | -0.04703728 | -0.09685570 | -0.00000000 | -0.00353980 |
|    |   | Z | -0.00000000 | -0.00000000 | -0.00000000 | 0.10895383  | 0.00000000  |
| 9  | C | X | 0.16243348  | -0.04776521 | -0.06206079 | -0.00000000 | -0.00829498 |
|    |   | Y | 0.09655178  | 0.03484070  | 0.14196188  | 0.00000000  | 0.00571933  |
|    |   | Z | 0.00000000  | 0.00000000  | 0.00000000  | -0.09291222 | -0.00000000 |
| 10 | O | X | -0.00369367 | -0.00032608 | 0.01546123  | 0.00000000  | 0.00617234  |
|    |   | Y | 0.01629551  | 0.00308124  | 0.01266365  | 0.00000000  | -0.00886364 |
|    |   | Z | -0.00000000 | -0.00000000 | -0.00000000 | 0.01836385  | 0.00000000  |
| 11 | C | X | -0.06838144 | 0.00119971  | -0.02541510 | -0.00000000 | 0.00008094  |
|    |   | Y | -0.12948706 | -0.00516520 | -0.06784371 | -0.00000000 | 0.00053630  |
|    |   | Z | -0.00000000 | -0.00000000 | -0.00000000 | 0.07004700  | 0.00000000  |
| 12 | N | X | 0.00171689  | 0.00431356  | 0.01223880  | 0.00000000  | 0.00034083  |
|    |   | Y | 0.00957730  | 0.00575315  | 0.01939321  | 0.00000000  | 0.00046643  |
|    |   | Z | 0.00000000  | 0.00000000  | 0.00000000  | -0.02240846 | -0.00000000 |
| 13 | N | X | -0.00760814 | 0.00049633  | -0.00182359 | -0.00000000 | 0.00006152  |
|    |   | Y | -0.00095362 | -0.00162723 | -0.00447714 | -0.00000000 | -0.00005678 |
|    |   | Z | -0.00000000 | -0.00000000 | -0.00000000 | 0.00374066  | 0.00000000  |
| 14 | H | X | -0.01316029 | -0.20088125 | 0.11699951  | 0.00000000  | 0.16803611  |
|    |   | Y | -0.00094212 | -0.02258602 | 0.06330751  | 0.00000000  | -0.03710408 |
|    |   | Z | -0.00000000 | 0.00000000  | -0.00000000 | 0.02657342  | 0.00000000  |
| 15 | H | X | -0.04506378 | -0.19969445 | 0.14607737  | 0.00000000  | -0.43409904 |
|    |   | Y | 0.02527162  | 0.11119423  | -0.15084861 | -0.00000000 | 0.32312056  |
|    |   | Z | -0.00000000 | -0.00000000 | -0.00000000 | 0.02913931  | -0.00000000 |
| 16 | H | X | -0.01087921 | -0.31506400 | 0.12448766  | 0.00000000  | 0.50610757  |
|    |   | Y | -0.02494564 | -0.21549681 | 0.05435850  | 0.00000000  | 0.10075019  |
|    |   | Z | 0.00000000  | 0.00000000  | 0.00000000  | 0.00263680  | -0.00000000 |
| 17 | H | X | 0.02526541  | 0.18730034  | -0.04924836 | -0.00000000 | 0.02907638  |
|    |   | Y | 0.02619998  | 0.15400893  | -0.07965974 | -0.00000000 | 0.22309074  |
|    |   | Z | -0.00000000 | 0.00000000  | -0.00000000 | 0.00679783  | -0.00000000 |
| 18 | H | X | -0.20212005 | 0.02350778  | 0.19992011  | -0.27050010 | 0.02658568  |
|    |   | Y | -0.00774460 | -0.05047868 | -0.06920165 | -0.27835163 | 0.00637897  |
|    |   | Z | 0.00623571  | 0.00236035  | 0.01035482  | -0.06368923 | 0.00545016  |
| 19 | H | X | -0.20212005 | 0.02350778  | 0.19992011  | 0.27050010  | 0.02658568  |
|    |   | Y | -0.00774460 | -0.05047868 | -0.06920165 | 0.27835163  | 0.00637897  |
|    |   | Z | -0.00623571 | -0.00236035 | -0.01035482 | -0.06368923 | -0.00545016 |
| 20 | H | X | 0.17002284  | -0.08265471 | -0.11487004 | -0.14784381 | -0.01900060 |
|    |   | Y | 0.09366845  | 0.02674187  | 0.12816066  | 0.22034318  | 0.00465683  |
|    |   | Z | -0.00513621 | -0.00373924 | -0.00994409 | 0.08268410  | -0.00004208 |
| 21 | H | X | 0.17002284  | -0.08265471 | -0.11487004 | 0.14784381  | -0.01900060 |
|    |   | Y | 0.09366845  | 0.02674187  | 0.12816066  | -0.22034318 | 0.00465683  |
|    |   | Z | 0.00513621  | 0.00373924  | 0.00994409  | 0.08268410  | 0.00004208  |
| 22 | H | X | -0.16919186 | 0.01562724  | -0.01836666 | 0.01889268  | 0.00362387  |
|    |   | Y | -0.14522102 | 0.00149742  | -0.05563560 | -0.18214359 | 0.00141493  |
|    |   | Z | -0.00748093 | 0.00466896  | 0.01060440  | -0.05431209 | 0.00063810  |
| 23 | H | X | -0.16919186 | 0.01562724  | -0.01836666 | -0.01889268 | 0.00362387  |
|    |   | Y | -0.14522102 | 0.00149742  | -0.05563560 | 0.18214359  | 0.00141493  |

|                |       |             |             |             |             |             |
|----------------|-------|-------------|-------------|-------------|-------------|-------------|
|                | Z     | 0.00748093  | -0.00466896 | -0.01060440 | -0.05431209 | -0.00063810 |
| TRANS. SAYVETZ | X     | 0.00056525  | 0.00051828  | -0.00070797 | -0.00000000 | -0.00060656 |
|                | Y     | 0.00006527  | 0.00046172  | -0.00028670 | 0.00000000  | -0.00014163 |
|                | Z     | -0.00000000 | -0.00000000 | 0.00000000  | 0.00040056  | -0.00000000 |
|                | TOTAL | 0.00056901  | 0.00069411  | 0.00076382  | 0.00040056  | 0.00062288  |

|              |       |             |             |             |             |             |
|--------------|-------|-------------|-------------|-------------|-------------|-------------|
| ROT. SAYVETZ | X     | -0.00000000 | -0.00000000 | -0.00000000 | -0.00350674 | 0.00000000  |
|              | Y     | 0.00000000  | -0.00000000 | 0.00000000  | 0.00159650  | 0.00000000  |
|              | Z     | 0.00085970  | 0.00293000  | 0.00231412  | -0.00000000 | -0.00114503 |
|              | TOTAL | 0.00085970  | 0.00293000  | 0.00231412  | 0.00385306  | 0.00114503  |

|               |  |         |         |         |         |         |
|---------------|--|---------|---------|---------|---------|---------|
|               |  | 41      | 42      | 43      | 44      | 45      |
| FREQUENCY:    |  | 1235.57 | 1242.35 | 1272.63 | 1281.86 | 1321.38 |
| SYMMETRY:     |  | A''     | A'      | A'      | A'      | A''     |
| REDUCED MASS: |  | 1.22460 | 2.36862 | 1.72809 | 2.24317 | 1.15019 |

|    |   |   |             |             |             |             |             |
|----|---|---|-------------|-------------|-------------|-------------|-------------|
| 1  | N | X | 0.00000000  | 0.03201433  | -0.01696635 | -0.09363644 | 0.00000000  |
|    |   | Y | -0.00000000 | -0.07475330 | -0.02384524 | 0.05721828  | 0.00000000  |
|    |   | Z | 0.00041018  | -0.00000000 | 0.00000000  | -0.00000000 | -0.00022501 |
| 2  | C | X | -0.00000000 | -0.00345270 | -0.00535544 | 0.13972440  | -0.00000000 |
|    |   | Y | -0.00000000 | -0.04852245 | 0.00417522  | -0.00281217 | -0.00000000 |
|    |   | Z | 0.00043559  | 0.00000000  | -0.00000000 | 0.00000000  | -0.00008272 |
| 3  | C | X | 0.00000000  | 0.01642350  | 0.13715371  | 0.00283498  | -0.00000000 |
|    |   | Y | 0.00000000  | 0.08324548  | -0.03837290 | -0.09073234 | 0.00000000  |
|    |   | Z | -0.00735168 | 0.00000000  | -0.00000000 | 0.00000000  | 0.00351232  |
| 4  | C | X | 0.00000000  | 0.03271105  | 0.01658471  | -0.03652123 | -0.00000000 |
|    |   | Y | -0.00000000 | -0.05296493 | -0.00123858 | 0.03414316  | 0.00000000  |
|    |   | Z | -0.00053257 | 0.00000000  | 0.00000000  | 0.00000000  | 0.00045880  |
| 5  | C | X | -0.00000000 | -0.07114067 | -0.02503521 | 0.04641407  | 0.00000000  |
|    |   | Y | -0.00000000 | -0.04922870 | 0.03673416  | 0.01431372  | -0.00000000 |
|    |   | Z | 0.00117705  | -0.00000000 | 0.00000000  | -0.00000000 | -0.00061457 |
| 6  | C | X | 0.00000000  | -0.01333264 | 0.01585527  | -0.03120267 | 0.00000000  |
|    |   | Y | 0.00000000  | 0.14726871  | 0.00191364  | -0.04104257 | -0.00000000 |
|    |   | Z | 0.00026408  | 0.00000000  | -0.00000000 | 0.00000000  | -0.00018356 |
| 7  | C | X | -0.00000000 | -0.03042525 | -0.07834624 | -0.00166311 | 0.00000000  |
|    |   | Y | -0.00000000 | -0.01077309 | -0.01680425 | 0.00163748  | 0.00000000  |
|    |   | Z | 0.03509349  | -0.00000000 | -0.00000000 | 0.00000000  | -0.01849698 |
| 8  | C | X | -0.00000000 | -0.01081490 | -0.05732393 | -0.01270643 | -0.00000000 |
|    |   | Y | 0.00000000  | 0.00626442  | -0.01289938 | -0.00473041 | 0.00000000  |
|    |   | Z | -0.00204670 | 0.00000000  | 0.00000000  | -0.00000000 | -0.01968475 |
| 9  | C | X | -0.00000000 | -0.00134308 | -0.03249272 | -0.00691514 | -0.00000000 |
|    |   | Y | -0.00000000 | 0.00159582  | 0.02795101  | 0.00611211  | -0.00000000 |
|    |   | Z | -0.05717336 | 0.00000000  | 0.00000000  | 0.00000000  | 0.09059780  |
| 10 | O | X | 0.00000000  | 0.01184787  | -0.00050005 | -0.00873883 | -0.00000000 |
|    |   | Y | -0.00000000 | -0.01325705 | 0.01331677  | 0.00830497  | -0.00000000 |
|    |   | Z | -0.00466272 | 0.00000000  | 0.00000000  | -0.00000000 | 0.00165110  |
| 11 | C | X | -0.00000000 | -0.00226813 | -0.02313609 | -0.00531058 | -0.00000000 |
|    |   | Y | -0.00000000 | -0.00402557 | -0.03722988 | -0.00810929 | -0.00000000 |
|    |   | Z | 0.09178159  | -0.00000000 | -0.00000000 | 0.00000000  | -0.01865869 |
| 12 | N | X | -0.00000000 | 0.00025356  | 0.00487521  | 0.00119870  | 0.00000000  |
|    |   | Y | 0.00000000  | 0.00088396  | 0.01132288  | 0.00254118  | 0.00000000  |
|    |   | Z | -0.05057336 | 0.00000000  | 0.00000000  | -0.00000000 | -0.04034718 |
| 13 | N | X | -0.00000000 | -0.00038310 | -0.00346867 | -0.00066239 | -0.00000000 |
|    |   | Y | 0.00000000  | 0.00005393  | -0.00039941 | -0.00021831 | 0.00000000  |
|    |   | Z | 0.00746386  | 0.00000000  | -0.00000000 | -0.00000000 | 0.00531199  |
| 14 | H | X | -0.00000000 | 0.27738758  | -0.25009364 | 0.26686366  | 0.00000000  |
|    |   | Y | -0.00000000 | 0.01823313  | -0.06181690 | 0.03094545  | 0.00000000  |
|    |   | Z | -0.00358693 | -0.00000000 | 0.00000000  | -0.00000000 | 0.00115572  |
| 15 | H | X | 0.00000000  | 0.05283948  | -0.20031916 | 0.14260926  | 0.00000000  |

|    |   |   |             |             |             |             |             |
|----|---|---|-------------|-------------|-------------|-------------|-------------|
|    |   | Y | -0.00000000 | -0.07441490 | 0.20228840  | -0.12688248 | -0.00000000 |
|    |   | Z | 0.00690017  | -0.00000000 | -0.00000000 | -0.00000000 | -0.00662685 |
| 16 | H | X | -0.00000000 | -0.20533020 | -0.06404478 | -0.39779511 | 0.00000000  |
|    |   | Y | -0.00000000 | -0.09796010 | 0.02753804  | -0.13768585 | 0.00000000  |
|    |   | Z | -0.00188015 | 0.00000000  | 0.00000000  | 0.00000000  | 0.00111496  |
| 17 | H | X | 0.00000000  | 0.04524538  | 0.00678622  | 0.02204887  | 0.00000000  |
|    |   | Y | 0.00000000  | 0.47144292  | -0.05028336 | 0.31093068  | -0.00000000 |
|    |   | Z | -0.00440370 | 0.00000000  | 0.00000000  | 0.00000000  | 0.00234238  |
| 18 | H | X | 0.33853575  | 0.05539878  | 0.33179178  | 0.06370685  | -0.28581062 |
|    |   | Y | 0.04070336  | 0.02102496  | 0.09190774  | 0.01495524  | 0.00391785  |
|    |   | Z | -0.01666021 | 0.00155773  | 0.02325559  | 0.00374632  | 0.02332677  |
| 19 | H | X | -0.33853575 | 0.05539878  | 0.33179178  | 0.06370685  | 0.28581062  |
|    |   | Y | -0.04070336 | 0.02102496  | 0.09190774  | 0.01495524  | -0.00391785 |
|    |   | Z | -0.01666021 | -0.00155773 | -0.02325559 | -0.00374632 | 0.02332677  |
| 20 | H | X | 0.26149193  | 0.03383132  | 0.24253830  | 0.04998655  | -0.12812792 |
|    |   | Y | 0.15409251  | 0.00753081  | 0.06449898  | 0.01340975  | -0.19896030 |
|    |   | Z | 0.02944652  | 0.00082680  | -0.00123828 | -0.00044998 | -0.03430952 |
| 21 | H | X | -0.26149193 | 0.03383132  | 0.24253830  | 0.04998655  | 0.12812792  |
|    |   | Y | -0.15409251 | 0.00753081  | 0.06449898  | 0.01340975  | 0.19896030  |
|    |   | Z | 0.02944652  | -0.00082680 | 0.00123828  | 0.00044998  | -0.03430952 |
| 22 | H | X | 0.36939476  | 0.00779053  | 0.10147534  | 0.02188289  | 0.53734115  |
|    |   | Y | -0.22910907 | -0.00290609 | -0.01826931 | -0.00342151 | 0.02084894  |
|    |   | Z | -0.04440403 | 0.00138604  | 0.01968226  | 0.00458729  | 0.02467985  |
| 23 | H | X | -0.36939476 | 0.00779053  | 0.10147534  | 0.02188289  | -0.53734115 |
|    |   | Y | 0.22910907  | -0.00290609 | -0.01826931 | -0.00342151 | -0.02084894 |
|    |   | Z | -0.04440403 | -0.00138604 | -0.01968226 | -0.00458729 | 0.02467985  |

|                |       |             |             |             |             |             |
|----------------|-------|-------------|-------------|-------------|-------------|-------------|
| TRANS. SAYVETZ | X     | -0.00000000 | -0.00069017 | -0.00049127 | -0.00034822 | -0.00000000 |
|                | Y     | 0.00000000  | 0.00011337  | -0.00011146 | 0.00014260  | 0.00000000  |
|                | Z     | 0.00054447  | 0.00000000  | 0.00000000  | 0.00000000  | 0.00040908  |
|                | TOTAL | 0.00054447  | 0.00069942  | 0.00050376  | 0.00037629  | 0.00040908  |

|              |       |             |             |             |             |             |
|--------------|-------|-------------|-------------|-------------|-------------|-------------|
| ROT. SAYVETZ | X     | -0.00392247 | 0.00000000  | -0.00000000 | -0.00000000 | 0.00230586  |
|              | Y     | 0.00085440  | -0.00000000 | -0.00000000 | -0.00000000 | 0.00361668  |
|              | Z     | -0.00000000 | -0.00033783 | -0.00112886 | 0.00082822  | -0.00000000 |
|              | TOTAL | 0.00401445  | 0.00033783  | 0.00112886  | 0.00082822  | 0.00428921  |

|               |  | 46      | 47      | 48      | 49      | 50      |
|---------------|--|---------|---------|---------|---------|---------|
| FREQUENCY:    |  | 1334.95 | 1357.80 | 1385.24 | 1395.27 | 1436.67 |
| SYMMETRY:     |  | A'      | A''     | A'      | A'      | A'      |
| REDUCED MASS: |  | 1.60409 | 1.07685 | 1.37922 | 1.27999 | 1.64162 |

|   |   |   |             |             |             |             |             |
|---|---|---|-------------|-------------|-------------|-------------|-------------|
| 1 | N | X | 0.01360422  | -0.00000000 | -0.00218677 | -0.00441610 | 0.01260503  |
|   |   | Y | 0.01714271  | -0.00000000 | -0.00267318 | 0.02325637  | -0.01967037 |
|   |   | Z | -0.00000000 | -0.00012006 | 0.00000000  | -0.00000000 | 0.00000000  |
| 2 | C | X | -0.01846101 | 0.00000000  | -0.01612070 | -0.05301642 | 0.01744459  |
|   |   | Y | -0.00921699 | -0.00000000 | 0.00965394  | -0.00559314 | 0.01774021  |
|   |   | Z | 0.00000000  | -0.00005590 | -0.00000000 | -0.00000000 | -0.00000000 |
| 3 | C | X | -0.08069763 | 0.00000000  | 0.01539188  | -0.03875360 | 0.01283228  |
|   |   | Y | 0.04180011  | -0.00000000 | -0.05569605 | -0.04806970 | -0.01866519 |
|   |   | Z | -0.00000000 | 0.00214037  | -0.00000000 | 0.00000000  | -0.00000000 |
| 4 | C | X | -0.02041393 | -0.00000000 | 0.04311876  | 0.04717749  | 0.00683548  |
|   |   | Y | 0.00892589  | -0.00000000 | -0.02308583 | -0.02561126 | -0.00162177 |
|   |   | Z | 0.00000000  | 0.00103358  | -0.00000000 | -0.00000000 | -0.00000000 |
| 5 | C | X | 0.01214091  | 0.00000000  | -0.00158683 | 0.00647764  | -0.00146300 |
|   |   | Y | -0.02759221 | 0.00000000  | 0.02360588  | 0.00814956  | 0.01479873  |
|   |   | Z | 0.00000000  | -0.00051320 | 0.00000000  | 0.00000000  | -0.00000000 |
| 6 | C | X | 0.00225835  | 0.00000000  | -0.00065762 | 0.01134954  | -0.01312265 |
|   |   | Y | -0.00934216 | 0.00000000  | 0.02667094  | 0.03816796  | -0.00713910 |
|   |   | Z | -0.00000000 | -0.00032186 | 0.00000000  | -0.00000000 | 0.00000000  |

|                |   |       |             |             |             |             |             |
|----------------|---|-------|-------------|-------------|-------------|-------------|-------------|
| 7              | C | X     | 0.10085152  | -0.00000000 | -0.05428913 | 0.04675937  | -0.06073515 |
|                |   | Y     | 0.02490979  | -0.00000000 | -0.01747216 | 0.01390544  | -0.02965130 |
|                |   | Z     | 0.00000000  | -0.01731192 | 0.00000000  | -0.00000000 | 0.00000000  |
| 8              | C | X     | -0.03136280 | 0.00000000  | 0.06642192  | -0.01645294 | 0.11988722  |
|                |   | Y     | 0.01114203  | -0.00000000 | 0.01478258  | -0.00674067 | 0.04779501  |
|                |   | Z     | 0.00000000  | -0.05735367 | -0.00000000 | 0.00000000  | 0.00000000  |
| 9              | C | X     | -0.06132468 | -0.00000000 | 0.04495876  | -0.05024189 | -0.10135876 |
|                |   | Y     | -0.01212401 | 0.00000000  | -0.01309202 | 0.00685063  | -0.01136692 |
|                |   | Z     | -0.00000000 | 0.02644913  | -0.00000000 | 0.00000000  | -0.00000000 |
| 10             | O | X     | -0.00584433 | 0.00000000  | 0.00008261  | -0.00774173 | 0.00316497  |
|                |   | Y     | -0.02442407 | 0.00000000  | 0.02066874  | -0.00181906 | 0.02049544  |
|                |   | Z     | -0.00000000 | 0.00230882  | 0.00000000  | 0.00000000  | -0.00000000 |
| 11             | C | X     | -0.06177496 | 0.00000000  | -0.07373076 | 0.04273055  | 0.02422247  |
|                |   | Y     | -0.04314763 | 0.00000000  | -0.01902271 | 0.00776668  | -0.00019800 |
|                |   | Z     | 0.00000000  | 0.03891970  | -0.00000000 | 0.00000000  | -0.00000000 |
| 12             | N | X     | 0.00597645  | 0.00000000  | 0.00187128  | -0.00036138 | 0.00040315  |
|                |   | Y     | 0.02087135  | -0.00000000 | 0.01584427  | -0.00791308 | -0.00212280 |
|                |   | Z     | 0.00000000  | 0.00346493  | 0.00000000  | -0.00000000 | 0.00000000  |
| 13             | N | X     | -0.01144203 | 0.00000000  | -0.01619574 | 0.00974527  | 0.00548777  |
|                |   | Y     | 0.00302259  | -0.00000000 | 0.00713374  | -0.00462173 | -0.00287043 |
|                |   | Z     | -0.00000000 | -0.00006765 | -0.00000000 | 0.00000000  | -0.00000000 |
| 14             | H | X     | 0.07889918  | -0.00000000 | 0.23979278  | 0.54175710  | -0.14969931 |
|                |   | Y     | 0.01697180  | -0.00000000 | 0.07692869  | 0.14968354  | -0.02413967 |
|                |   | Z     | -0.00000000 | 0.00010061  | 0.00000000  | -0.00000000 | 0.00000000  |
| 15             | H | X     | 0.13188749  | -0.00000000 | -0.21631579 | -0.23387649 | -0.03056264 |
|                |   | Y     | -0.13213059 | 0.00000000  | 0.21438469  | 0.23150757  | 0.03328865  |
|                |   | Z     | -0.00000000 | -0.01356142 | 0.00000000  | 0.00000000  | -0.00000000 |
| 16             | H | X     | 0.13453475  | -0.00000000 | -0.17090019 | -0.15336472 | -0.02837066 |
|                |   | Y     | 0.01063255  | 0.00000000  | -0.03100240 | -0.04579294 | 0.00849003  |
|                |   | Z     | -0.00000000 | 0.00124786  | 0.00000000  | -0.00000000 | -0.00000000 |
| 17             | H | X     | -0.00003125 | 0.00000000  | -0.03262329 | -0.05590809 | 0.00954798  |
|                |   | Y     | -0.03289884 | 0.00000000  | -0.15124406 | -0.35601475 | 0.13615544  |
|                |   | Z     | 0.00000000  | 0.00202526  | -0.00000000 | 0.00000000  | -0.00000000 |
| 18             | H | X     | 0.04539371  | -0.38894769 | -0.19667162 | 0.06782257  | -0.31795565 |
|                |   | Y     | 0.00602330  | 0.04944856  | -0.06069971 | 0.02014485  | -0.14872740 |
|                |   | Z     | -0.01163778 | 0.02607668  | -0.01769780 | 0.00870378  | -0.08126123 |
| 19             | H | X     | 0.04539371  | 0.38894769  | -0.19667162 | 0.06782257  | -0.31795565 |
|                |   | Y     | 0.00602330  | -0.04944856 | -0.06069971 | 0.02014485  | -0.14872740 |
|                |   | Z     | 0.01163778  | 0.02607668  | 0.01769780  | -0.00870378 | 0.08126123  |
| 20             | H | X     | 0.35338113  | 0.53929840  | -0.15559451 | 0.16915255  | 0.34757687  |
|                |   | Y     | 0.04700213  | 0.01977097  | -0.01413718 | 0.01790996  | 0.03342201  |
|                |   | Z     | 0.00372924  | -0.01011860 | 0.01866315  | -0.01278648 | -0.00881516 |
| 21             | H | X     | 0.35338113  | -0.53929840 | -0.15559451 | 0.16915255  | 0.34757687  |
|                |   | Y     | 0.04700213  | -0.01977097 | -0.01413718 | 0.01790996  | 0.03342201  |
|                |   | Z     | -0.00372924 | -0.01011860 | -0.01866315 | 0.01278648  | 0.00881516  |
| 22             | H | X     | 0.36330264  | -0.10290731 | 0.41628078  | -0.23573947 | -0.11046381 |
|                |   | Y     | 0.01136879  | -0.06980735 | 0.03451454  | -0.02108400 | -0.02231579 |
|                |   | Z     | 0.05680218  | -0.01032539 | 0.05788189  | -0.03151759 | -0.01878615 |
| 23             | H | X     | 0.36330264  | 0.10290731  | 0.41628078  | -0.23573947 | -0.11046381 |
|                |   | Y     | 0.01136879  | 0.06980735  | 0.03451454  | -0.02108400 | -0.02231579 |
|                |   | Z     | -0.05680218 | -0.01032539 | -0.05788189 | 0.03151759  | 0.01878615  |
| TRANS. SAYVETZ |   | X     | -0.00085096 | 0.00000000  | -0.00023557 | -0.00003705 | 0.00054053  |
|                |   | Y     | -0.00046803 | -0.00000000 | -0.00029578 | 0.00037437  | 0.00035855  |
|                |   | Z     | -0.00000000 | -0.00025855 | -0.00000000 | 0.00000000  | -0.00000000 |
|                |   | TOTAL | 0.00097118  | 0.00025855  | 0.00037813  | 0.00037620  | 0.00064864  |
| ROT. SAYVETZ   |   | X     | 0.00000000  | -0.00048388 | -0.00000000 | 0.00000000  | 0.00000000  |
|                |   | Y     | -0.00000000 | 0.00366294  | 0.00000000  | 0.00000000  | 0.00000000  |
|                |   | Z     | 0.00195249  | -0.00000000 | 0.00705462  | 0.00035393  | 0.00034377  |

TOTAL 0.00195249 0.00369476 0.00705462 0.00035393 0.00034377

|               | 51      | 52      | 53      | 54      | 55      |
|---------------|---------|---------|---------|---------|---------|
| FREQUENCY:    | 1493.38 | 1500.73 | 1525.08 | 1535.95 | 1546.53 |
| SYMMETRY:     | A'      | A'      | A'      | A'      | A'      |
| REDUCED MASS: | 2.57712 | 1.07773 | 1.10727 | 1.09617 | 2.19795 |

|    |   |   |             |             |             |             |             |
|----|---|---|-------------|-------------|-------------|-------------|-------------|
| 1  | N | X | 0.10260245  | -0.00336821 | -0.00412063 | 0.00047994  | 0.00877741  |
|    |   | Y | -0.05323202 | 0.00164893  | -0.00636623 | -0.00496882 | -0.06436737 |
|    |   | Z | -0.00000000 | -0.00000000 | 0.00000000  | 0.00000000  | 0.00000000  |
| 2  | C | X | -0.03377107 | 0.00111102  | 0.01307108  | 0.00593163  | 0.06370467  |
|    |   | Y | 0.07511612  | -0.00238161 | -0.00113178 | 0.00129780  | 0.02191036  |
|    |   | Z | -0.00000000 | 0.00000000  | 0.00000000  | -0.00000000 | -0.00000000 |
| 3  | C | X | -0.08541001 | 0.00358153  | -0.00588409 | -0.00626601 | -0.06977954 |
|    |   | Y | -0.11339026 | 0.00296908  | 0.01809998  | 0.00642751  | 0.05211866  |
|    |   | Z | -0.00000000 | 0.00000000  | 0.00000000  | -0.00000000 | -0.00000000 |
| 4  | C | X | 0.03992999  | -0.00143749 | -0.00210256 | -0.00110459 | -0.02777409 |
|    |   | Y | 0.01578443  | 0.00013952  | -0.01304226 | -0.00608185 | -0.05499769 |
|    |   | Z | 0.00000000  | -0.00000000 | 0.00000000  | -0.00000000 | -0.00000000 |
| 5  | C | X | -0.00323292 | -0.00068931 | 0.02030713  | 0.01185846  | 0.13369522  |
|    |   | Y | 0.04440901  | -0.00185246 | 0.00473349  | 0.00308951  | 0.02421143  |
|    |   | Z | -0.00000000 | 0.00000000  | -0.00000000 | 0.00000000  | 0.00000000  |
| 6  | C | X | -0.05021801 | 0.00205203  | -0.00726985 | -0.00497272 | -0.05022754 |
|    |   | Y | -0.04190193 | 0.00171356  | 0.00912245  | 0.00493760  | 0.07732269  |
|    |   | Z | 0.00000000  | -0.00000000 | -0.00000000 | 0.00000000  | -0.00000000 |
| 7  | C | X | 0.05831386  | -0.00282171 | -0.00886063 | 0.00145830  | 0.02365601  |
|    |   | Y | 0.01251348  | -0.00144224 | 0.00435792  | 0.00212367  | 0.01038965  |
|    |   | Z | -0.00000000 | -0.00000000 | 0.00000000  | 0.00000000  | 0.00000000  |
| 8  | C | X | -0.02145025 | -0.00375893 | 0.04274988  | 0.01042146  | -0.01631298 |
|    |   | Y | -0.01623070 | 0.01148551  | -0.06356037 | -0.02350979 | 0.00917366  |
|    |   | Z | -0.00000000 | 0.00000000  | -0.00000000 | 0.00000000  | 0.00000000  |
| 9  | C | X | 0.00609861  | 0.00658904  | -0.02068417 | -0.00122903 | 0.00368690  |
|    |   | Y | 0.00420701  | 0.00821423  | 0.01648143  | -0.07776203 | 0.00447524  |
|    |   | Z | 0.00000000  | -0.00000000 | -0.00000000 | 0.00000000  | 0.00000000  |
| 10 | O | X | -0.01130304 | 0.00019064  | 0.00382251  | 0.00116256  | 0.00423888  |
|    |   | Y | 0.00566424  | 0.00069597  | -0.00852088 | -0.00285782 | -0.01507709 |
|    |   | Z | 0.00000000  | -0.00000000 | -0.00000000 | 0.00000000  | -0.00000000 |
| 11 | C | X | -0.00048594 | 0.00223657  | -0.00251276 | 0.01043601  | -0.00038891 |
|    |   | Y | -0.00282816 | -0.07178971 | -0.00532481 | -0.00988099 | 0.00142445  |
|    |   | Z | -0.00000000 | 0.00000000  | 0.00000000  | -0.00000000 | -0.00000000 |
| 12 | N | X | 0.00016734  | -0.00271635 | 0.00058284  | -0.00125256 | 0.00003251  |
|    |   | Y | -0.00025410 | -0.01223872 | -0.00004353 | -0.00228809 | 0.00012929  |
|    |   | Z | -0.00000000 | -0.00000000 | -0.00000000 | 0.00000000  | -0.00000000 |
| 13 | N | X | 0.00061658  | 0.01281782  | 0.00159489  | 0.00176890  | -0.00021812 |
|    |   | Y | -0.00039585 | -0.00551094 | -0.00107137 | -0.00046421 | 0.00010965  |
|    |   | Z | -0.00000000 | 0.00000000  | -0.00000000 | 0.00000000  | 0.00000000  |
| 14 | H | X | -0.10300006 | 0.00412923  | -0.06331899 | -0.03464229 | -0.34686987 |
|    |   | Y | 0.06878071  | -0.00200742 | -0.02098564 | -0.00899555 | -0.08189274 |
|    |   | Z | 0.00000000  | -0.00000000 | -0.00000000 | 0.00000000  | 0.00000000  |
| 15 | H | X | -0.16388458 | 0.00472485  | -0.01179538 | -0.01291116 | -0.17630685 |
|    |   | Y | 0.20986051  | -0.00569358 | -0.00799895 | 0.00282888  | 0.05955261  |
|    |   | Z | -0.00000000 | -0.00000000 | 0.00000000  | -0.00000000 | 0.00000000  |
| 16 | H | X | -0.00717148 | 0.00286656  | -0.06369574 | -0.03391401 | -0.36231247 |
|    |   | Y | 0.05564678  | -0.00105235 | -0.02483851 | -0.01281867 | -0.15058735 |
|    |   | Z | -0.00000000 | -0.00000000 | 0.00000000  | -0.00000000 | -0.00000000 |
| 17 | H | X | 0.03326528  | -0.00054192 | -0.01815346 | -0.00973576 | -0.11215022 |
|    |   | Y | 0.47810564  | -0.01492632 | -0.04480258 | -0.01679191 | -0.22204729 |
|    |   | Z | 0.00000000  | 0.00000000  | -0.00000000 | -0.00000000 | -0.00000000 |
| 18 | H | X | 0.05817865  | 0.01233699  | -0.17788099 | -0.05707802 | 0.05469743  |
|    |   | Y | 0.04450937  | -0.06159358 | 0.45654580  | 0.13598005  | -0.07698061 |

|    |   |   |             |             |             |             |             |
|----|---|---|-------------|-------------|-------------|-------------|-------------|
| 19 | H | Z | 0.03368660  | -0.05301394 | 0.38784875  | 0.11989656  | -0.06899585 |
|    |   | X | 0.05817865  | 0.01233699  | -0.17788099 | -0.05707802 | 0.05469743  |
|    |   | Y | 0.04450937  | -0.06159358 | 0.45654580  | 0.13598005  | -0.07698061 |
| 20 | H | Z | -0.03368660 | 0.05301394  | -0.38784875 | -0.11989656 | 0.06899585  |
|    |   | X | -0.02516512 | 0.00645374  | 0.06421956  | -0.03727827 | -0.00847144 |
|    |   | Y | -0.01016016 | -0.03731872 | -0.16095658 | 0.49683921  | -0.01946037 |
| 21 | H | Z | -0.00732488 | -0.03079028 | -0.12971896 | 0.40122692  | -0.01576609 |
|    |   | X | -0.02516512 | 0.00645374  | 0.06421956  | -0.03727827 | -0.00847144 |
|    |   | Y | -0.01016016 | -0.03731872 | -0.16095658 | 0.49683921  | -0.01946037 |
| 22 | H | Z | 0.00732488  | 0.03079028  | 0.12971896  | -0.40122692 | 0.01576609  |
|    |   | X | -0.00396030 | -0.11340232 | 0.00392893  | -0.03415514 | 0.00074230  |
|    |   | Y | 0.02172604  | 0.53262001  | 0.05297193  | 0.05260329  | -0.01016440 |
| 23 | H | Z | 0.01565488  | 0.39393505  | 0.03850871  | 0.04022206  | -0.00775932 |
|    |   | X | -0.00396030 | -0.11340232 | 0.00392893  | -0.03415514 | 0.00074230  |
|    |   | Y | 0.02172604  | 0.53262001  | 0.05297193  | 0.05260329  | -0.01016440 |
|    |   | Z | -0.01565488 | -0.39393505 | -0.03850871 | -0.04022206 | 0.00775932  |

|                |   |             |            |             |             |            |
|----------------|---|-------------|------------|-------------|-------------|------------|
| TRANS. SAYVETZ | X | 0.00011293  | 0.00025089 | 0.00032846  | -0.00000286 | 0.00045457 |
|                | Y | 0.00001271  | 0.00068071 | -0.00103685 | -0.00061827 | 0.00024541 |
|                | Z | -0.00000000 | 0.00000000 | -0.00000000 | 0.00000000  | 0.00000000 |
| TOTAL          |   | 0.00011365  | 0.00072547 | 0.00108763  | 0.00061828  | 0.00051658 |

|              |   |             |             |             |            |            |
|--------------|---|-------------|-------------|-------------|------------|------------|
| ROT. SAYVETZ | X | -0.00000000 | -0.00000000 | -0.00000000 | 0.00000000 | 0.00000000 |
|              | Y | -0.00000000 | 0.00000000  | -0.00000000 | 0.00000000 | 0.00000000 |
|              | Z | -0.00087126 | -0.00201287 | 0.00247270  | 0.00395114 | 0.00030605 |
| TOTAL        |   | 0.00087126  | 0.00201287  | 0.00247270  | 0.00395114 | 0.00030605 |

|               | 56      | 57      | 58       | 59       | 60      |
|---------------|---------|---------|----------|----------|---------|
| FREQUENCY:    | 1664.15 | 1686.16 | 1807.88  | 2443.21  | 3070.56 |
| SYMMETRY:     | A'      | A'      | A'       | A'       | A'      |
| REDUCED MASS: | 5.29716 | 5.69290 | 11.78917 | 13.53559 | 1.06044 |

|    |   |   |             |             |             |             |             |
|----|---|---|-------------|-------------|-------------|-------------|-------------|
| 1  | N | X | -0.01476503 | -0.07520990 | -0.00300923 | -0.00002056 | -0.00008124 |
|    |   | Y | -0.05857423 | 0.03799298  | -0.00533043 | -0.00001403 | 0.00006767  |
|    |   | Z | -0.00000000 | 0.00000000  | 0.00000000  | -0.00000000 | 0.00000000  |
| 2  | C | X | 0.07180013  | 0.12269483  | 0.00729650  | 0.00001389  | 0.00026232  |
|    |   | Y | 0.05604136  | 0.00586089  | 0.01353724  | 0.00004716  | -0.00001313 |
|    |   | Z | 0.00000000  | -0.00000000 | -0.00000000 | -0.00000000 | -0.00000000 |
| 3  | C | X | -0.03502801 | -0.09274620 | 0.00908932  | -0.00007904 | 0.00008078  |
|    |   | Y | -0.12414501 | 0.04462531  | -0.03823472 | -0.00011851 | 0.00032558  |
|    |   | Z | 0.00000000  | -0.00000000 | -0.00000000 | 0.00000000  | -0.00000000 |
| 4  | C | X | -0.01546481 | 0.13039797  | 0.00787944  | 0.00001734  | -0.00165370 |
|    |   | Y | 0.09322880  | -0.08651306 | 0.00970370  | -0.00000027 | -0.00142383 |
|    |   | Z | 0.00000000  | -0.00000000 | -0.00000000 | 0.00000000  | -0.00000000 |
| 5  | C | X | -0.06596720 | -0.11537066 | -0.01344559 | -0.00003223 | 0.00009557  |
|    |   | Y | -0.08519790 | 0.00889213  | -0.00661927 | -0.00002032 | 0.00007365  |
|    |   | Z | 0.00000000  | 0.00000000  | 0.00000000  | -0.00000000 | 0.00000000  |
| 6  | C | X | 0.04485913  | 0.04173632  | 0.00515199  | 0.00000792  | -0.00007013 |
|    |   | Y | 0.14228399  | -0.02835152 | 0.00895627  | 0.00001962  | -0.00004867 |
|    |   | Z | 0.00000000  | 0.00000000  | 0.00000000  | 0.00000000  | 0.00000000  |
| 7  | C | X | 0.01801227  | 0.01791238  | -0.06810535 | 0.00009624  | -0.00107088 |
|    |   | Y | -0.02022904 | -0.00002102 | 0.21701869  | 0.00069566  | 0.00044983  |
|    |   | Z | -0.00000000 | 0.00000000  | 0.00000000  | 0.00000000  | 0.00000000  |
| 8  | C | X | 0.00153677  | -0.00450299 | 0.00889523  | -0.00020976 | -0.01195618 |
|    |   | Y | -0.00267771 | 0.00045460  | -0.00812384 | -0.00065190 | 0.06587826  |
|    |   | Z | -0.00000000 | -0.00000000 | 0.00000000  | -0.00000000 | -0.00000000 |
| 9  | C | X | -0.00090562 | 0.00016808  | 0.00105327  | -0.00429704 | 0.00169340  |
|    |   | Y | -0.00028594 | -0.00001255 | 0.00471990  | -0.00019185 | -0.00454169 |
|    |   | Z | 0.00000000  | 0.00000000  | 0.00000000  | 0.00000000  | -0.00000000 |
| 10 | O | X | -0.01086207 | 0.00129877  | 0.03759130  | 0.00008179  | 0.00017146  |

|                |   |       |             |             |             |             |             |
|----------------|---|-------|-------------|-------------|-------------|-------------|-------------|
|                |   | Y     | 0.02287545  | -0.00437020 | -0.14082931 | -0.00032903 | -0.00062420 |
|                |   | Z     | 0.00000000  | -0.00000000 | -0.00000000 | -0.00000000 | -0.00000000 |
| 11             | C | X     | -0.00003452 | -0.00007193 | -0.00141987 | -0.00091560 | -0.00002954 |
|                |   | Y     | 0.00009935  | 0.00023680  | -0.00270485 | 0.00488876  | -0.00038193 |
|                |   | Z     | 0.00000000  | 0.00000000  | -0.00000000 | 0.00000000  | -0.00000000 |
| 12             | N | X     | 0.00003852  | -0.00002129 | 0.00065227  | 0.16705354  | -0.00018901 |
|                |   | Y     | 0.00007103  | -0.00000092 | 0.00094648  | -0.09732533 | -0.00019427 |
|                |   | Z     | -0.00000000 | -0.00000000 | -0.00000000 | -0.00000000 | 0.00000000  |
| 13             | N | X     | 0.00003620  | 0.00003307  | 0.00079445  | -0.15897036 | 0.00000600  |
|                |   | Y     | -0.00005609 | -0.00002537 | -0.00077413 | 0.09237646  | 0.00006657  |
|                |   | Z     | -0.00000000 | 0.00000000  | 0.00000000  | 0.00000000  | -0.00000000 |
| 14             | H | X     | -0.12727242 | -0.17147652 | -0.01964612 | 0.00000281  | -0.00040681 |
|                |   | Y     | 0.01159100  | -0.06683680 | 0.01316101  | 0.00011549  | 0.00011301  |
|                |   | Z     | 0.00000000  | 0.00000000  | 0.00000000  | -0.00000000 | 0.00000000  |
| 15             | H | X     | 0.14476294  | -0.15142830 | 0.01137699  | 0.00009679  | 0.01557594  |
|                |   | Y     | -0.04144033 | 0.16958244  | 0.01095623  | 0.00001741  | 0.01652646  |
|                |   | Z     | 0.00000000  | 0.00000000  | 0.00000000  | -0.00000000 | -0.00000000 |
| 16             | H | X     | 0.14604327  | 0.07392630  | 0.01711872  | 0.00002310  | 0.00081742  |
|                |   | Y     | -0.02539548 | 0.08534793  | 0.00354292  | -0.00000109 | -0.00243852 |
|                |   | Z     | -0.00000000 | -0.00000000 | 0.00000000  | -0.00000000 | 0.00000000  |
| 17             | H | X     | -0.00802455 | 0.05478073  | 0.00352680  | 0.00005841  | 0.00029742  |
|                |   | Y     | -0.23240767 | 0.01617033  | -0.00927210 | -0.00001941 | -0.00025122 |
|                |   | Z     | -0.00000000 | -0.00000000 | -0.00000000 | -0.00000000 | -0.00000000 |
| 18             | H | X     | -0.00178891 | 0.01468482  | -0.04198812 | 0.00121054  | 0.07059852  |
|                |   | Y     | 0.01645248  | -0.00369220 | -0.04119322 | -0.00004345 | -0.38679892 |
|                |   | Z     | 0.01425614  | -0.00487497 | -0.01966427 | 0.00046566  | 0.55913804  |
| 19             | H | X     | -0.00178891 | 0.01468482  | -0.04198812 | 0.00121054  | 0.07059852  |
|                |   | Y     | 0.01645248  | -0.00369220 | -0.04119322 | -0.00004345 | -0.38679892 |
|                |   | Z     | -0.01425614 | 0.00487497  | 0.01966427  | -0.00046566 | -0.55913804 |
| 20             | H | X     | 0.00008581  | -0.00222955 | 0.01111278  | 0.00466137  | -0.00157621 |
|                |   | Y     | 0.00032291  | -0.00085379 | 0.00864357  | 0.00045901  | 0.02254847  |
|                |   | Z     | 0.00052865  | -0.00024796 | -0.00202040 | 0.00015241  | -0.03457615 |
| 21             | H | X     | 0.00008581  | -0.00222955 | 0.01111278  | 0.00466137  | -0.00157621 |
|                |   | Y     | 0.00032291  | -0.00085379 | 0.00864357  | 0.00045901  | 0.02254847  |
|                |   | Z     | -0.00052865 | 0.00024796  | 0.00202040  | -0.00015241 | 0.03457615  |
| 22             | H | X     | 0.00028563  | 0.00011425  | -0.00313011 | -0.03049944 | -0.00135392 |
|                |   | Y     | 0.00030662  | -0.00029984 | -0.00355273 | 0.00879763  | 0.00366738  |
|                |   | Z     | 0.00010222  | -0.00045116 | -0.00050128 | 0.01715095  | -0.00557681 |
| 23             | H | X     | 0.00028563  | 0.00011425  | -0.00313011 | -0.03049944 | -0.00135392 |
|                |   | Y     | 0.00030662  | -0.00029984 | -0.00355273 | 0.00879763  | 0.00366738  |
|                |   | Z     | -0.00010222 | 0.00045116  | 0.00050128  | -0.01715095 | 0.00557681  |
| TRANS. SAYVETZ |   | X     | 0.00011916  | 0.00000114  | 0.00005896  | -0.00002767 | 0.00006910  |
|                |   | Y     | -0.00017633 | -0.00009705 | 0.00001845  | -0.00005455 | 0.00024177  |
|                |   | Z     | -0.00000000 | 0.00000000  | 0.00000000  | -0.00000000 | 0.00000000  |
|                |   | TOTAL | 0.00021282  | 0.00009705  | 0.00006178  | 0.00006117  | 0.00025145  |
| ROT. SAYVETZ   |   | X     | 0.00000000  | -0.00000000 | -0.00000000 | -0.00000000 | 0.00000000  |
|                |   | Y     | -0.00000000 | -0.00000000 | 0.00000000  | -0.00000000 | 0.00000000  |
|                |   | Z     | -0.00014073 | -0.00072587 | -0.00016309 | 0.00022956  | 0.00017194  |
|                |   | TOTAL | 0.00014073  | 0.00072587  | 0.00016309  | 0.00022956  | 0.00017194  |
|                |   |       | 61          | 62          | 63          | 64          | 65          |
| FREQUENCY:     |   |       | 3117.28     | 3118.41     | 3124.71     | 3174.60     | 3196.13     |
| SYMMETRY:      |   |       | A''         | A'          | A'          | A''         | A''         |
| REDUCED MASS:  |   |       | 1.10391     | 1.05993     | 1.05736     | 1.11016     | 1.11150     |
| 1              | N | X     | 0.00000000  | -0.00000169 | 0.00001179  | -0.00000000 | -0.00000000 |
|                |   | Y     | 0.00000000  | -0.00000915 | 0.00001117  | -0.00000000 | -0.00000000 |
|                |   | Z     | 0.00000400  | 0.00000000  | 0.00000000  | -0.00000150 | -0.00000010 |

|    |   |   |             |             |             |             |             |
|----|---|---|-------------|-------------|-------------|-------------|-------------|
| 2  | C | X | 0.00000000  | 0.00001158  | -0.00002609 | 0.00000000  | 0.00000000  |
|    |   | Y | -0.00000000 | -0.00004019 | 0.00004748  | -0.00000000 | -0.00000000 |
|    |   | Z | 0.00001249  | 0.00000000  | -0.00000000 | 0.00000688  | -0.00000002 |
| 3  | C | X | -0.00000000 | 0.00002991  | 0.00000041  | 0.00000000  | 0.00000000  |
|    |   | Y | 0.00000000  | -0.00007702 | 0.00010814  | -0.00000000 | -0.00000000 |
|    |   | Z | -0.00002018 | 0.00000000  | -0.00000000 | -0.00005744 | -0.00003973 |
| 4  | C | X | 0.00000000  | -0.00014400 | 0.00023710  | -0.00000000 | -0.00000000 |
|    |   | Y | 0.00000000  | -0.00012589 | 0.00021705  | -0.00000000 | -0.00000000 |
|    |   | Z | 0.00013685  | 0.00000000  | -0.00000000 | 0.00002233  | 0.00000807  |
| 5  | C | X | -0.00000000 | 0.00001683  | -0.00000526 | -0.00000000 | -0.00000000 |
|    |   | Y | 0.00000000  | -0.00000472 | -0.00002014 | 0.00000000  | 0.00000000  |
|    |   | Z | 0.00008388  | 0.00000000  | -0.00000000 | 0.00001199  | 0.00000481  |
| 6  | C | X | -0.00000000 | 0.00000442  | 0.00002005  | -0.00000000 | 0.00000000  |
|    |   | Y | 0.00000000  | -0.00000187 | -0.00000374 | 0.00000000  | -0.00000000 |
|    |   | Z | -0.00001474 | -0.00000000 | 0.00000000  | -0.00000238 | -0.00000093 |
| 7  | C | X | 0.00000000  | -0.00033174 | 0.00018216  | -0.00000000 | -0.00000000 |
|    |   | Y | -0.00000000 | 0.00058494  | -0.00088540 | 0.00000000  | 0.00000000  |
|    |   | Z | -0.00085613 | -0.00000000 | 0.00000000  | -0.00006656 | 0.00008556  |
| 8  | C | X | 0.00000000  | -0.00014981 | 0.00047746  | -0.00000000 | 0.00000000  |
|    |   | Y | -0.00000000 | 0.00188260  | -0.00310149 | 0.00000000  | 0.00000000  |
|    |   | Z | -0.08816049 | -0.00000000 | 0.00000000  | -0.01112553 | -0.00417428 |
| 9  | C | X | 0.00000000  | -0.00495272 | 0.00741951  | -0.00000000 | -0.00000000 |
|    |   | Y | -0.00000000 | 0.04126309  | -0.05194483 | 0.00000000  | 0.00000000  |
|    |   | Z | 0.01203183  | 0.00000000  | -0.00000000 | -0.08179699 | -0.03815289 |
| 10 | O | X | -0.00000000 | 0.00037702  | -0.00043624 | 0.00000000  | 0.00000000  |
|    |   | Y | 0.00000000  | -0.00021201 | 0.00038441  | -0.00000000 | -0.00000000 |
|    |   | Z | -0.00016587 | -0.00000000 | 0.00000000  | 0.00016648  | 0.00005153  |
| 11 | C | X | 0.00000000  | -0.00543951 | -0.00329429 | 0.00000000  | -0.00000000 |
|    |   | Y | 0.00000000  | -0.05189471 | -0.03840673 | 0.00000000  | -0.00000000 |
|    |   | Z | -0.00078010 | -0.00000000 | 0.00000000  | 0.03963951  | -0.08373451 |
| 12 | N | X | -0.00000000 | 0.00321746  | 0.00217811  | -0.00000000 | 0.00000000  |
|    |   | Y | 0.00000000  | -0.00094685 | -0.00121522 | 0.00000000  | -0.00000000 |
|    |   | Z | 0.00011618  | -0.00000000 | 0.00000000  | -0.00026375 | 0.00077896  |
| 13 | N | X | 0.00000000  | -0.00192385 | -0.00172273 | 0.00000000  | -0.00000000 |
|    |   | Y | -0.00000000 | 0.00079194  | 0.00080937  | -0.00000000 | 0.00000000  |
|    |   | Z | -0.00002499 | 0.00000000  | -0.00000000 | 0.00016580  | -0.00045524 |
| 14 | H | X | -0.00000000 | -0.00025664 | 0.00030985  | -0.00000000 | -0.00000000 |
|    |   | Y | 0.00000000  | 0.00053507  | -0.00083185 | 0.00000000  | 0.00000000  |
|    |   | Z | 0.00006246  | 0.00000000  | -0.00000000 | 0.00004609  | 0.00002790  |
| 15 | H | X | -0.00000000 | 0.00156692  | -0.00260106 | 0.00000000  | 0.00000000  |
|    |   | Y | -0.00000000 | 0.00169619  | -0.00275159 | 0.00000000  | 0.00000000  |
|    |   | Z | -0.00063336 | -0.00000000 | 0.00000000  | -0.00004653 | 0.00002137  |
| 16 | H | X | 0.00000000  | 0.00002462  | -0.00014004 | 0.00000000  | 0.00000000  |
|    |   | Y | -0.00000000 | -0.00004873 | 0.00042553  | -0.00000000 | -0.00000000 |
|    |   | Z | 0.00000537  | 0.00000000  | -0.00000000 | -0.00001581 | 0.00000549  |
| 17 | H | X | 0.00000000  | -0.00004145 | -0.00024322 | 0.00000000  | -0.00000000 |
|    |   | Y | -0.00000000 | -0.00004092 | 0.00004919  | -0.00000000 | 0.00000000  |
|    |   | Z | -0.00020857 | -0.00000000 | 0.00000000  | -0.00002090 | -0.00000766 |
| 18 | H | X | 0.06884275  | 0.00223602  | -0.00598608 | 0.01113376  | 0.00594040  |
|    |   | Y | -0.39451834 | -0.01181934 | 0.02115658  | -0.04807563 | -0.01927434 |
|    |   | Z | 0.52991448  | 0.01629598  | -0.03007108 | 0.06559791  | 0.02561265  |
| 19 | H | X | -0.06884275 | 0.00223602  | -0.00598608 | -0.01113376 | -0.00594040 |
|    |   | Y | 0.39451834  | -0.01181934 | 0.02115658  | 0.04807563  | 0.01927434  |
|    |   | Z | 0.52991448  | -0.01629598 | 0.03007108  | 0.06559791  | 0.02561265  |
| 20 | H | X | -0.00278379 | 0.03268500  | -0.03801403 | 0.04851712  | 0.01892463  |
|    |   | Y | 0.05162846  | -0.23454581 | 0.30849677  | -0.35244981 | -0.16550150 |
|    |   | Z | -0.07127238 | 0.34239939  | -0.44458823 | 0.48367094  | 0.22522203  |
| 21 | H | X | 0.00278379  | 0.03268500  | -0.03801403 | -0.04851712 | -0.01892463 |
|    |   | Y | -0.05162846 | -0.23454581 | 0.30849677  | 0.35244981  | 0.16550150  |
|    |   | Z | -0.07127238 | -0.34239939 | 0.44458823  | 0.48367094  | 0.22522203  |



|    |   |   |             |             |             |             |             |
|----|---|---|-------------|-------------|-------------|-------------|-------------|
| 22 | H | X | -0.00124686 | 0.01767640  | 0.01572142  | 0.00762235  | -0.02910805 |
|    |   | Y | -0.00330916 | 0.29821091  | 0.23113780  | 0.15794858  | -0.34446179 |
|    |   | Z | 0.00410950  | -0.45444434 | -0.34842987 | -0.23224161 | 0.49655044  |
| 23 | H | X | 0.00124686  | 0.01767640  | 0.01572142  | -0.00762235 | 0.02910805  |
|    |   | Y | 0.00330916  | 0.29821091  | 0.23113780  | -0.15794858 | 0.34446179  |
|    |   | Z | 0.00410950  | 0.45444434  | 0.34842987  | -0.23224161 | 0.49655044  |

|                |       |             |             |             |             |             |
|----------------|-------|-------------|-------------|-------------|-------------|-------------|
| TRANS. SAYVETZ | X     | -0.00000000 | -0.00001751 | 0.00000140  | -0.00000000 | -0.00000000 |
|                | Y     | -0.00000000 | 0.00000760  | -0.00002844 | 0.00000000  | 0.00000000  |
|                | Z     | -0.00015407 | -0.00000000 | 0.00000000  | -0.00016952 | -0.00017670 |
|                | TOTAL | 0.00015407  | 0.00001909  | 0.00002847  | 0.00016952  | 0.00017670  |

|              |       |             |             |             |             |             |
|--------------|-------|-------------|-------------|-------------|-------------|-------------|
| ROT. SAYVETZ | X     | 0.00059198  | 0.00000000  | -0.00000000 | -0.00001147 | 0.00002143  |
|              | Y     | -0.00021168 | -0.00000000 | 0.00000000  | -0.00080502 | -0.00125572 |
|              | Z     | -0.00000000 | -0.00057691 | -0.00021739 | -0.00000000 | -0.00000000 |
|              | TOTAL | 0.00062868  | 0.00057691  | 0.00021739  | 0.00080510  | 0.00125590  |

|               |  |         |         |         |         |
|---------------|--|---------|---------|---------|---------|
|               |  | 66      | 67      | 68      | 69      |
| FREQUENCY:    |  | 3208.92 | 3217.01 | 3233.15 | 3240.21 |
| SYMMETRY:     |  | A'      | A'      | A'      | A'      |
| REDUCED MASS: |  | 1.08935 | 1.09216 | 1.09265 | 1.09843 |

|    |   |   |             |             |             |             |
|----|---|---|-------------|-------------|-------------|-------------|
| 1  | N | X | -0.00020829 | 0.00063710  | -0.00083270 | -0.00034336 |
|    |   | Y | 0.00004779  | -0.00032718 | 0.00093942  | 0.00028712  |
|    |   | Z | -0.00000000 | 0.00000000  | -0.00000000 | 0.00000000  |
| 2  | C | X | 0.00054519  | -0.00020008 | 0.01917619  | -0.00277377 |
|    |   | Y | 0.00024658  | 0.00453441  | -0.08075453 | 0.01124572  |
|    |   | Z | 0.00000000  | 0.00000000  | 0.00000000  | -0.00000000 |
| 3  | C | X | -0.00134005 | -0.00050467 | 0.00213065  | -0.00071107 |
|    |   | Y | 0.00289117  | 0.00114888  | 0.00247368  | 0.00102213  |
|    |   | Z | -0.00000000 | -0.00000000 | -0.00000000 | 0.00000000  |
| 4  | C | X | -0.04949541 | -0.01909807 | -0.00364160 | -0.01721068 |
|    |   | Y | -0.05693451 | -0.02062035 | -0.00263132 | -0.01425856 |
|    |   | Z | -0.00000000 | 0.00000000  | 0.00000000  | -0.00000000 |
| 5  | C | X | -0.00690846 | 0.01033497  | 0.00407507  | 0.02480164  |
|    |   | Y | 0.02560131  | -0.01662528 | -0.01084485 | -0.07322472 |
|    |   | Z | 0.00000000  | -0.00000000 | 0.00000000  | 0.00000000  |
| 6  | C | X | 0.01971020  | -0.07540326 | -0.00148887 | 0.02983119  |
|    |   | Y | -0.00351370 | 0.01195483  | 0.00137778  | -0.00134276 |
|    |   | Z | 0.00000000  | -0.00000000 | 0.00000000  | 0.00000000  |
| 7  | C | X | -0.00036875 | -0.00020900 | -0.00005178 | -0.00021777 |
|    |   | Y | -0.00045549 | -0.00013277 | -0.00133993 | 0.00007655  |
|    |   | Z | 0.00000000  | -0.00000000 | 0.00000000  | -0.00000000 |
| 8  | C | X | 0.00007041  | 0.00001707  | -0.00012993 | 0.00004414  |
|    |   | Y | -0.00126722 | -0.00042977 | 0.00002530  | -0.00018954 |
|    |   | Z | -0.00000000 | -0.00000000 | 0.00000000  | -0.00000000 |
| 9  | C | X | 0.00009362  | 0.00003558  | -0.00000800 | 0.00002564  |
|    |   | Y | -0.00006418 | -0.00002578 | -0.00010935 | 0.00001136  |
|    |   | Z | 0.00000000  | -0.00000000 | -0.00000000 | 0.00000000  |
| 10 | O | X | 0.00022929  | 0.00005896  | 0.00038687  | 0.00005527  |
|    |   | Y | -0.00003875 | -0.00004966 | 0.00057429  | -0.00012943 |
|    |   | Z | 0.00000000  | 0.00000000  | -0.00000000 | -0.00000000 |
| 11 | C | X | 0.00002967  | 0.00001788  | 0.00000751  | -0.00000503 |
|    |   | Y | -0.00001922 | -0.00001352 | 0.00001485  | 0.00000684  |
|    |   | Z | 0.00000000  | -0.00000000 | 0.00000000  | -0.00000000 |
| 12 | N | X | 0.00000411  | -0.00000936 | -0.00002023 | 0.00000543  |
|    |   | Y | 0.00000565  | 0.00000498  | -0.00000420 | 0.00000278  |
|    |   | Z | -0.00000000 | 0.00000000  | 0.00000000  | -0.00000000 |
| 13 | N | X | 0.00000363  | 0.00000706  | 0.00000255  | -0.00000200 |
|    |   | Y | -0.00000313 | -0.00000394 | 0.00000208  | -0.00000231 |

|                |   |       |             |             |             |             |
|----------------|---|-------|-------------|-------------|-------------|-------------|
|                |   | Z     | -0.00000000 | -0.00000000 | -0.00000000 | 0.00000000  |
| 14             | H | X     | -0.00158989 | 0.01439761  | -0.23558140 | 0.03112663  |
|                |   | Y     | 0.00137946  | -0.05749590 | 0.91288801  | -0.12185153 |
|                |   | Z     | -0.00000000 | -0.00000000 | -0.00000000 | 0.00000000  |
| 15             | H | X     | 0.58052588  | 0.21224634  | 0.03389791  | 0.15914284  |
|                |   | Y     | 0.64375716  | 0.23423639  | 0.03621507  | 0.17031433  |
|                |   | Z     | -0.00000000 | -0.00000000 | -0.00000000 | 0.00000000  |
| 16             | H | X     | 0.10416827  | -0.07861986 | -0.04269292 | -0.27844073 |
|                |   | Y     | -0.30646021 | 0.20985960  | 0.12190943  | 0.81074292  |
|                |   | Z     | -0.00000000 | -0.00000000 | 0.00000000  | 0.00000000  |
| 17             | H | X     | -0.22995872 | 0.85617069  | 0.01126397  | -0.30909245 |
|                |   | Y     | 0.03974750  | -0.14783407 | -0.00233296 | 0.04847660  |
|                |   | Z     | 0.00000000  | -0.00000000 | 0.00000000  | 0.00000000  |
| 18             | H | X     | -0.00224854 | -0.00075237 | 0.00006963  | -0.00049433 |
|                |   | Y     | 0.00893625  | 0.00303853  | 0.00062409  | 0.00140561  |
|                |   | Z     | -0.01281586 | -0.00441109 | -0.00073303 | -0.00195426 |
| 19             | H | X     | -0.00224854 | -0.00075237 | 0.00006963  | -0.00049433 |
|                |   | Y     | 0.00893625  | 0.00303853  | 0.00062409  | 0.00140561  |
|                |   | Z     | 0.01281586  | 0.00441109  | 0.00073303  | 0.00195426  |
| 20             | H | X     | -0.00056763 | -0.00020267 | -0.00016265 | -0.00010716 |
|                |   | Y     | 0.00118179  | 0.00043795  | 0.00042056  | 0.00015188  |
|                |   | Z     | -0.00162327 | -0.00059824 | -0.00064553 | -0.00022338 |
| 21             | H | X     | -0.00056763 | -0.00020267 | -0.00016265 | -0.00010716 |
|                |   | Y     | 0.00118179  | 0.00043795  | 0.00042056  | 0.00015188  |
|                |   | Z     | 0.00162327  | 0.00059824  | 0.00064553  | 0.00022338  |
| 22             | H | X     | 0.00008539  | 0.00003643  | 0.00004198  | 0.00001068  |
|                |   | Y     | 0.00012239  | 0.00008385  | 0.00003858  | -0.00008242 |
|                |   | Z     | -0.00014137 | -0.00011081 | -0.00003111 | 0.00011357  |
| 23             | H | X     | 0.00008539  | 0.00003643  | 0.00004198  | 0.00001068  |
|                |   | Y     | 0.00012239  | 0.00008385  | 0.00003858  | -0.00008242 |
|                |   | Z     | 0.00014137  | 0.00011081  | 0.00003111  | -0.00011357 |
| TRANS. SAYVETZ |   | X     | 0.00008335  | -0.00008176 | 0.00007151  | -0.00002765 |
|                |   | Y     | -0.00007221 | -0.00006261 | 0.00007568  | -0.00012060 |
|                |   | Z     | 0.00000000  | -0.00000000 | 0.00000000  | 0.00000000  |
|                |   | TOTAL | 0.00011028  | 0.00010298  | 0.00010412  | 0.00012373  |
| ROT. SAYVETZ   |   | X     | 0.00000000  | 0.00000000  | -0.00000000 | -0.00000000 |
|                |   | Y     | -0.00000000 | 0.00000000  | -0.00000000 | -0.00000000 |
|                |   | Z     | -0.00022695 | -0.00029841 | 0.00092995  | -0.00073920 |
|                |   | TOTAL | 0.00022695  | 0.00029841  | 0.00092995  | 0.00073920  |

REFERENCE ON SAYVETZ CONDITIONS - A. SAYVETZ, J.CHEM.PHYS., 7, 383-389(1939).

NOTE - THE MODES J,K ARE ORTHONORMALIZED ACCORDING TO  

$$\text{SUM ON I } M(I) * (X(I, J)*X(I, K) + Y(I, J)*Y(I, K) + Z(I, J)*Z(I, K)) = \text{DELTA}(J, K)$$
