# Supplementary material for: Physico-chemical properties of 4-(methylnitrosamino)-1-(3-pyridyl)-1-butanone (NNK) diazonium ion: a theoretical investigation
Source: Royal Society of Chemistry journal article supplement (doi:10.1039/d1ra04343a), 2021-01-01
Supplement: d1ra04343a3.pdf [file d1ra04343a3.pdf]

Vibrational Analysis, PDI Anti Conformer, CCSD(T)/cc-pVTZ

-----  
NORMAL COORDINATE ANALYSIS IN THE HARMONIC APPROXIMATION  
-----

ATOMIC WEIGHTS (AMU)

|    |   |          |
|----|---|----------|
| 1  | H | 1.00782  |
| 2  | C | 12.00000 |
| 3  | C | 12.00000 |
| 4  | C | 12.00000 |
| 5  | N | 14.00307 |
| 6  | N | 14.00307 |
| 7  | H | 1.00782  |
| 8  | H | 1.00782  |
| 9  | H | 1.00782  |
| 10 | H | 1.00782  |
| 11 | H | 1.00782  |
| 12 | H | 1.00782  |

MODES 1 TO 6 ARE TAKEN AS ROTATIONS AND TRANSLATIONS.

ANALYZING SYMMETRY OF NORMAL MODES...

--- SYMMETRY FOR NORMAL MODES ---

INCLUDING TRANSLATION AND ROTATION

21\*A' 15\*A''

EXCLUDING TRANSLATION AND ROTATION (SAYVETZ < 0.01)

16\*A' 9\*A''

FREQUENCIES IN CM\*\*-1, IR INTENSITIES IN DEBYE\*\*2/AMU-ANGSTROM\*\*2,  
REDUCED MASSES IN AMU.

|   |               |   | 1           | 2           | 3           | 4           | 5           |
|---|---------------|---|-------------|-------------|-------------|-------------|-------------|
|   | FREQUENCY:    |   | 16.91       | 16.67       | 13.51       | 5.06        | 4.07        |
|   | SYMMETRY:     |   | A'          | A''         | A''         | A'          | A'          |
|   | REDUCED MASS: |   | 3.81207     | 5.59135     | 1.76519     | 7.10812     | 7.04565     |
| 1 | H             | X | -0.05905091 | 0.00000000  | -0.00000000 | -0.06221565 | 0.09798814  |
|   |               | Y | 0.23879053  | -0.00000000 | 0.00000000  | -0.01089376 | 0.02200768  |
|   |               | Z | 0.00000000  | 0.06762440  | 0.19322832  | 0.00000000  | 0.00000000  |
| 2 | C             | X | -0.01026429 | 0.00000000  | -0.00000000 | -0.08360207 | 0.08350208  |
|   |               | Y | 0.19699842  | -0.00000000 | 0.00000000  | 0.00740260  | 0.03438725  |
|   |               | Z | 0.00000000  | 0.10473587  | 0.02062237  | 0.00000000  | 0.00000000  |
| 3 | C             | X | -0.04310598 | 0.00000000  | -0.00000000 | -0.06910696 | 0.09335254  |
|   |               | Y | 0.11342315  | -0.00000000 | 0.00000000  | 0.04426441  | 0.05940624  |
|   |               | Z | 0.00000000  | 0.08915257  | 0.13989932  | -0.00000000 | 0.00000000  |
| 4 | C             | X | 0.02545822  | -0.00000000 | -0.00000000 | -0.09978719 | 0.07239387  |
|   |               | Y | 0.05761027  | -0.00000000 | 0.00000000  | 0.06922845  | 0.07644678  |
|   |               | Z | 0.00000000  | 0.14211337  | -0.10956398 | 0.00000000  | -0.00000000 |
| 5 | N             | X | -0.00363689 | 0.00000000  | -0.00000000 | -0.08664951 | 0.08145471  |
|   |               | Y | -0.02337002 | 0.00000000  | -0.00000000 | 0.10584122  | 0.10167907  |
|   |               | Z | 0.00000000  | 0.12847975  | -0.00737841 | -0.00000000 | -0.00000000 |
| 6 | N             | X | -0.02759285 | 0.00000000  | -0.00000000 | -0.07571187 | 0.08907676  |
|   |               | Y | -0.08100343 | 0.00000000  | -0.00000000 | 0.13215933  | 0.12002002  |
|   |               | Z | 0.00000000  | 0.11614186  | 0.07676723  | -0.00000000 | -0.00000000 |
| 7 | H             | X | 0.02539161  | 0.00447917  | 0.00108727  | -0.09924123 | 0.07287813  |
|   |               | Y | 0.20821507  | 0.03596251  | -0.18619091 | 0.00254625  | 0.03110928  |
|   |               | Z | 0.00007368  | 0.12835864  | -0.10682374 | -0.00000645 | 0.00000897  |

|    |   |   |             |             |             |             |             |
|----|---|---|-------------|-------------|-------------|-------------|-------------|
| 8  | H | X | 0.02539161  | -0.00447917 | -0.00108727 | -0.09924123 | 0.07287813  |
|    |   | Y | 0.20821507  | -0.03596251 | 0.18619091  | 0.00254625  | 0.03110928  |
|    |   | Z | -0.00007368 | 0.12835864  | -0.10682374 | 0.00000645  | -0.00000897 |
| 9  | H | X | -0.07872635 | -0.00444035 | -0.00034099 | -0.05329532 | 0.10410403  |
|    |   | Y | 0.10318476  | -0.03607213 | 0.18711835  | 0.04882903  | 0.06250118  |
|    |   | Z | 0.00001679  | 0.06517180  | 0.26895462  | 0.00000336  | -0.00000518 |
| 10 | H | X | -0.07872635 | 0.00444035  | 0.00034099  | -0.05329532 | 0.10410403  |
|    |   | Y | 0.10318476  | 0.03607213  | -0.18711835 | 0.04882903  | 0.06250118  |
|    |   | Z | -0.00001679 | 0.06517180  | 0.26895462  | -0.00000336 | 0.00000518  |
| 11 | H | X | 0.06093467  | 0.00448942  | -0.00218038 | -0.11578595 | 0.06143564  |
|    |   | Y | 0.06007517  | 0.03651029  | -0.18794078 | 0.06813166  | 0.07567646  |
|    |   | Z | 0.00001211  | 0.16694768  | -0.23844604 | -0.00000022 | -0.00000422 |
| 12 | H | X | 0.06093467  | -0.00448942 | 0.00218038  | -0.11578595 | 0.06143564  |
|    |   | Y | 0.06007517  | -0.03651029 | 0.18794078  | 0.06813166  | 0.07567646  |
|    |   | Z | -0.00001211 | 0.16694768  | -0.23844604 | 0.00000022  | 0.00000422  |

|                |   |             |             |             |             |            |
|----------------|---|-------------|-------------|-------------|-------------|------------|
| TRANS. SAYVETZ | X | -0.81645103 | 0.00000000  | -0.00000000 | -5.90705925 | 5.95826777 |
|                | Y | 3.94425615  | -0.00000000 | 0.00000000  | 5.01338920  | 5.51075419 |
|                | Z | 0.00000000  | 8.25222658  | 1.62406478  | -0.00000000 | 0.00000000 |
| TOTAL          |   | 4.02787151  | 8.25222658  | 1.62406478  | 7.74773646  | 8.11599449 |

|              |   |             |             |             |              |             |
|--------------|---|-------------|-------------|-------------|--------------|-------------|
| ROT. SAYVETZ | X | -0.00000000 | -1.68880458 | 8.69835600  | -0.00000000  | 0.00000000  |
|              | Y | 0.00000000  | 2.02629677  | -0.52887569 | -0.00000000  | -0.00000000 |
|              | Z | 25.27884628 | -0.00000000 | 0.00000000  | -11.33937443 | -7.77810130 |
| TOTAL        |   | 25.27884628 | 2.63779064  | 8.71441947  | 11.33937443  | 7.77810130  |

|               | 6       | 7       | 8       | 9       | 10      |
|---------------|---------|---------|---------|---------|---------|
| FREQUENCY:    | 9.26    | 97.95   | 158.64  | 232.92  | 316.64  |
| SYMMETRY:     | A''     | A''     | A'      | A''     | A'      |
| REDUCED MASS: | 4.66264 | 2.73078 | 4.65112 | 1.08469 | 3.29235 |

|    |   |   |             |             |             |             |             |
|----|---|---|-------------|-------------|-------------|-------------|-------------|
| 1  | H | X | 0.00000000  | 0.00000000  | -0.11595224 | -0.00000000 | -0.02263788 |
|    |   | Y | -0.00000000 | -0.00000000 | 0.17588242  | 0.00000000  | 0.19800115  |
|    |   | Z | 0.21440182  | 0.07435559  | -0.00000000 | 0.57723453  | 0.00000000  |
| 2  | C | X | 0.00000000  | 0.00000000  | -0.01853877 | -0.00000000 | 0.13210790  |
|    |   | Y | -0.00000000 | -0.00000000 | 0.09191170  | 0.00000000  | 0.06300875  |
|    |   | Z | 0.17362223  | 0.12048579  | -0.00000000 | 0.01570242  | -0.00000000 |
| 3  | C | X | 0.00000000  | 0.00000000  | -0.07393756 | -0.00000000 | 0.05243026  |
|    |   | Y | -0.00000000 | 0.00000000  | -0.06415725 | 0.00000000  | -0.10975562 |
|    |   | Z | 0.07150343  | -0.11027405 | 0.00000000  | -0.07161033 | -0.00000000 |
| 4  | C | X | 0.00000000  | -0.00000000 | -0.01337787 | 0.00000000  | -0.04170411 |
|    |   | Y | -0.00000000 | 0.00000000  | -0.11941408 | 0.00000000  | -0.04449578 |
|    |   | Z | 0.01455955  | -0.12049108 | 0.00000000  | 0.02885205  | 0.00000000  |
| 5  | N | X | 0.00000000  | 0.00000000  | 0.01415741  | 0.00000000  | -0.04700396 |
|    |   | Y | -0.00000000 | 0.00000000  | -0.06278891 | -0.00000000 | 0.08958908  |
|    |   | Z | -0.08275546 | -0.01173800 | -0.00000000 | 0.00208340  | -0.00000000 |
| 6  | N | X | 0.00000000  | 0.00000000  | 0.09748305  | 0.00000000  | -0.09482827 |
|    |   | Y | -0.00000000 | 0.00000000  | 0.13738989  | 0.00000000  | -0.01966033 |
|    |   | Z | -0.15319151 | 0.11648286  | -0.00000000 | 0.01407683  | 0.00000000  |
| 7  | H | X | -0.06052842 | -0.09880691 | 0.05195528  | -0.21142508 | 0.24326601  |
|    |   | Y | 0.00798879  | 0.13172389  | 0.11502435  | -0.40491008 | 0.10358451  |
|    |   | Z | 0.19190058  | 0.23122466  | 0.00033853  | -0.21332893 | 0.00241162  |
| 8  | H | X | 0.06052842  | 0.09880691  | 0.05195528  | 0.21142508  | 0.24326601  |
|    |   | Y | -0.00798879 | -0.13172389 | 0.11502435  | 0.40491008  | 0.10358451  |
|    |   | Z | 0.19190058  | 0.23122466  | -0.00033853 | -0.21332893 | -0.00241162 |
| 9  | H | X | 0.06070429  | 0.10023535  | -0.13154151 | 0.02136327  | 0.03821755  |
|    |   | Y | -0.00677127 | -0.07442168 | -0.07672307 | -0.06229464 | -0.10185031 |
|    |   | Z | 0.05478027  | -0.18086281 | 0.00173003  | -0.11834939 | 0.00695680  |
| 10 | H | X | -0.06070429 | -0.10023535 | -0.13154151 | -0.02136327 | 0.03821755  |
|    |   | Y | 0.00677127  | 0.07442168  | -0.07672307 | 0.06229464  | -0.10185031 |

|    |   |   |             |             |             |             |             |
|----|---|---|-------------|-------------|-------------|-------------|-------------|
|    |   | Z | 0.05478027  | -0.18086281 | -0.00173003 | -0.11834939 | -0.00695680 |
| 11 | H | X | -0.05988985 | 0.04553482  | -0.00988114 | 0.00665885  | -0.13457157 |
|    |   | Y | 0.00570371  | -0.03269825 | -0.11584661 | 0.09745406  | -0.04817846 |
|    |   | Z | 0.02131031  | -0.14444423 | 0.00174453  | 0.09545118  | 0.00242206  |
| 12 | H | X | 0.05988985  | -0.04553482 | -0.00988114 | -0.00665885 | -0.13457157 |
|    |   | Y | -0.00570371 | 0.03269825  | -0.11584661 | -0.09745406 | -0.04817846 |
|    |   | Z | 0.02131031  | -0.14444423 | -0.00174453 | 0.09545118  | -0.00242206 |

|        |         |       |             |            |             |            |             |
|--------|---------|-------|-------------|------------|-------------|------------|-------------|
| TRANS. | SAYVETZ | X     | 0.00000000  | 0.00000000 | -0.00413557 | 0.00000000 | 0.00122994  |
|        |         | Y     | -0.00000000 | 0.00000000 | -0.03431823 | 0.00000000 | -0.00975940 |
|        |         | Z     | 0.56849640  | 0.02869771 | -0.00000000 | 0.00722273 | -0.00000000 |
|        |         | TOTAL | 0.56849640  | 0.02869771 | 0.03456651  | 0.00722273 | 0.00983660  |

|      |         |       |              |             |             |             |             |
|------|---------|-------|--------------|-------------|-------------|-------------|-------------|
| ROT. | SAYVETZ | X     | -0.34314455  | 0.15609324  | -0.00000000 | 0.03715468  | -0.00000000 |
|      |         | Y     | -27.91581034 | 0.27460837  | 0.00000000  | -0.03815319 | -0.00000000 |
|      |         | Z     | 0.00000000   | -0.00000000 | -0.15418336 | 0.00000000  | -0.03591783 |
|      |         | TOTAL | 27.91791925  | 0.31587159  | 0.15418336  | 0.05325538  | 0.03591783  |

|               |  |  |         |         |         |         |         |
|---------------|--|--|---------|---------|---------|---------|---------|
|               |  |  | 11      | 12      | 13      | 14      | 15      |
| FREQUENCY:    |  |  | 345.29  | 472.58  | 669.25  | 755.36  | 877.62  |
| SYMMETRY:     |  |  | A'      | A'      | A'      | A'      | A'      |
| REDUCED MASS: |  |  | 4.38835 | 8.05801 | 6.72151 | 1.08099 | 1.18130 |

|    |   |   |             |             |             |             |             |
|----|---|---|-------------|-------------|-------------|-------------|-------------|
| 1  | H | X | -0.00000000 | -0.08009924 | 0.01032913  | 0.00000000  | -0.00000000 |
|    |   | Y | 0.00000000  | 0.01476604  | -0.05086782 | -0.00000000 | 0.00000000  |
|    |   | Z | 0.05787970  | -0.00000000 | 0.00000000  | -0.07805990 | 0.19541425  |
| 2  | C | X | 0.00000000  | -0.07494571 | -0.05017301 | 0.00000000  | -0.00000000 |
|    |   | Y | 0.00000000  | 0.01202791  | 0.00470712  | 0.00000000  | -0.00000000 |
|    |   | Z | 0.01094849  | -0.00000000 | -0.00000000 | 0.00998559  | -0.05286537 |
| 3  | C | X | 0.00000000  | -0.05845455 | -0.02692760 | -0.00000000 | 0.00000000  |
|    |   | Y | -0.00000000 | -0.04774606 | -0.00423145 | 0.00000000  | -0.00000000 |
|    |   | Z | -0.03260724 | 0.00000000  | 0.00000000  | 0.05514609  | -0.03483780 |
| 4  | C | X | -0.00000000 | -0.05185621 | 0.21637192  | -0.00000000 | 0.00000000  |
|    |   | Y | -0.00000000 | -0.02169341 | -0.09718167 | 0.00000000  | 0.00000000  |
|    |   | Z | -0.05008412 | 0.00000000  | 0.00000000  | 0.05036220  | 0.09024034  |
| 5  | N | X | -0.00000000 | 0.14630605  | -0.03589160 | 0.00000000  | 0.00000000  |
|    |   | Y | 0.00000000  | 0.14908214  | 0.08702578  | -0.00000000 | -0.00000000 |
|    |   | Z | 0.20380849  | 0.00000000  | -0.00000000 | -0.01975768 | -0.03132215 |
| 6  | N | X | -0.00000000 | 0.05377381  | -0.07724434 | 0.00000000  | 0.00000000  |
|    |   | Y | 0.00000000  | -0.09186741 | 0.01480393  | -0.00000000 | -0.00000000 |
|    |   | Z | -0.12090592 | -0.00000000 | 0.00000000  | 0.00397296  | 0.00637939  |
| 7  | H | X | -0.04428662 | -0.06832553 | -0.09487710 | 0.17302048  | -0.33687662 |
|    |   | Y | -0.01288604 | 0.01043372  | -0.01626231 | -0.10668494 | 0.15809831  |
|    |   | Z | 0.01164226  | -0.00201117 | -0.00345943 | -0.10368571 | 0.13397833  |
| 8  | H | X | 0.04428662  | -0.06832553 | -0.09487710 | -0.17302048 | 0.33687662  |
|    |   | Y | 0.01288604  | 0.01043372  | -0.01626231 | 0.10668494  | -0.15809831 |
|    |   | Z | 0.01164226  | 0.00201117  | 0.00345943  | -0.10368571 | 0.13397833  |
| 9  | H | X | 0.01060260  | -0.09520910 | -0.07743544 | 0.08548385  | -0.33260825 |
|    |   | Y | 0.00996779  | -0.05029051 | -0.03312611 | -0.41793693 | 0.03943430  |
|    |   | Z | -0.02744924 | 0.00357652  | -0.00832582 | -0.25694100 | 0.05675366  |
| 10 | H | X | -0.01060260 | -0.09520910 | -0.07743544 | -0.08548385 | 0.33260825  |
|    |   | Y | -0.00996779 | -0.05029051 | -0.03312611 | 0.41793693  | -0.03943430 |
|    |   | Z | -0.02744924 | -0.00357652 | 0.00832582  | -0.25694100 | 0.05675366  |
| 11 | H | X | 0.17252827  | -0.08362112 | 0.12385101  | -0.10164930 | -0.06819829 |
|    |   | Y | -0.14961880 | -0.02350324 | -0.05672691 | -0.33783960 | -0.32272800 |
|    |   | Z | -0.16419298 | 0.00320026  | 0.02733704  | -0.17865341 | -0.13016122 |
| 12 | H | X | -0.17252827 | -0.08362112 | 0.12385101  | 0.10164930  | 0.06819829  |
|    |   | Y | 0.14961880  | -0.02350324 | -0.05672691 | 0.33783960  | 0.32272800  |
|    |   | Z | -0.16419298 | -0.00320026 | -0.02733704 | -0.17865341 | -0.13016122 |

|                |       |             |             |             |             |             |
|----------------|-------|-------------|-------------|-------------|-------------|-------------|
| TRANS. SAYVETZ | X     | -0.00000000 | -0.00025086 | -0.00026639 | -0.00000000 | 0.00000000  |
|                | Y     | 0.00000000  | -0.00058694 | 0.00029927  | -0.00000000 | -0.00000000 |
|                | Z     | -0.00450825 | 0.00000000  | -0.00000000 | -0.00077857 | 0.00020350  |
|                | TOTAL | 0.00450825  | 0.00063830  | 0.00040066  | 0.00077857  | 0.00020350  |

|              |       |             |             |            |             |             |
|--------------|-------|-------------|-------------|------------|-------------|-------------|
| ROT. SAYVETZ | X     | -0.00747727 | -0.00000000 | 0.00000000 | 0.00159366  | -0.00084312 |
|              | Y     | 0.02246073  | 0.00000000  | 0.00000000 | -0.00338011 | -0.00179008 |
|              | Z     | 0.00000000  | -0.00405053 | 0.00058974 | 0.00000000  | -0.00000000 |
|              | TOTAL | 0.02367264  | 0.00405053  | 0.00058974 | 0.00373697  | 0.00197870  |

|               |  |         |         |         |         |         |
|---------------|--|---------|---------|---------|---------|---------|
|               |  | 16      | 17      | 18      | 19      | 20      |
| FREQUENCY:    |  | 903.57  | 1028.66 | 1130.68 | 1174.28 | 1275.74 |
| SYMMETRY:     |  | A'      | A'      | A'      | A''     | A''     |
| REDUCED MASS: |  | 1.76933 | 3.26721 | 2.19305 | 1.57844 | 1.20176 |

|    |   |   |             |             |             |             |             |
|----|---|---|-------------|-------------|-------------|-------------|-------------|
| 1  | H | X | 0.47685121  | -0.09229214 | -0.31234801 | -0.00000000 | 0.00000000  |
|    |   | Y | -0.28895087 | 0.02973911  | 0.17461036  | 0.00000000  | 0.00000000  |
|    |   | Z | 0.00000000  | -0.00000000 | 0.00000000  | 0.16745556  | 0.15346814  |
| 2  | C | X | 0.08670975  | -0.13676180 | -0.00369628 | 0.00000000  | 0.00000000  |
|    |   | Y | 0.04882043  | 0.06921749  | -0.10141152 | -0.00000000 | 0.00000000  |
|    |   | Z | -0.00000000 | -0.00000000 | -0.00000000 | -0.08003588 | -0.07360467 |
| 3  | C | X | 0.01639189  | 0.18670430  | -0.01499945 | -0.00000000 | -0.00000000 |
|    |   | Y | 0.10512324  | -0.00491144 | 0.15282232  | 0.00000000  | -0.00000000 |
|    |   | Z | -0.00000000 | 0.00000000  | 0.00000000  | 0.11493127  | 0.07333832  |
| 4  | C | X | -0.06237208 | -0.02751033 | -0.02689790 | 0.00000000  | -0.00000000 |
|    |   | Y | -0.11696068 | -0.06002536 | -0.11631485 | -0.00000000 | -0.00000000 |
|    |   | Z | 0.00000000  | -0.00000000 | 0.00000000  | -0.10363338 | 0.03190580  |
| 5  | N | X | 0.00413817  | -0.00724162 | 0.01092307  | -0.00000000 | -0.00000000 |
|    |   | Y | 0.01556394  | -0.00684834 | 0.02657600  | -0.00000000 | 0.00000000  |
|    |   | Z | -0.00000000 | -0.00000000 | 0.00000000  | 0.04566268  | -0.04867261 |
| 6  | N | X | -0.00554903 | -0.00644748 | -0.00399869 | 0.00000000  | -0.00000000 |
|    |   | Y | -0.00407206 | 0.00251799  | -0.00590881 | -0.00000000 | 0.00000000  |
|    |   | Z | -0.00000000 | -0.00000000 | 0.00000000  | -0.00757368 | 0.00747418  |
| 7  | H | X | -0.19882416 | -0.16652559 | 0.28170678  | -0.23384149 | -0.15797596 |
|    |   | Y | -0.09456480 | 0.06520067  | 0.08163646  | 0.14468332  | 0.12675853  |
|    |   | Z | -0.03184362 | -0.00072141 | 0.06014160  | 0.07455704  | 0.05222615  |
| 8  | H | X | -0.19882416 | -0.16652559 | 0.28170678  | 0.23384149  | 0.15797596  |
|    |   | Y | -0.09456480 | 0.06520067  | 0.08163646  | -0.14468332 | -0.12675853 |
|    |   | Z | 0.03184362  | 0.00072141  | -0.06014160 | 0.07455704  | 0.05222615  |
| 9  | H | X | -0.14870528 | 0.26346709  | 0.11208666  | -0.03982186 | 0.28309229  |
|    |   | Y | 0.06694306  | 0.01007447  | 0.16651664  | -0.28216192 | -0.07859248 |
|    |   | Z | 0.00145662  | -0.00274067 | -0.01909040 | -0.07456247 | -0.03264663 |
| 10 | H | X | -0.14870528 | 0.26346709  | 0.11208666  | 0.03982186  | -0.28309229 |
|    |   | Y | 0.06694306  | 0.01007447  | 0.16651664  | 0.28216192  | 0.07859248  |
|    |   | Z | -0.00145662 | 0.00274067  | 0.01909040  | -0.07456247 | -0.03264663 |
| 11 | H | X | -0.12366410 | -0.08929624 | -0.01427248 | -0.25792141 | 0.51567939  |
|    |   | Y | -0.12738121 | -0.08560291 | -0.09282440 | 0.21981184  | -0.00991093 |
|    |   | Z | 0.00101730  | -0.00918862 | 0.01866491  | 0.06101831  | 0.00144714  |
| 12 | H | X | -0.12366410 | -0.08929624 | -0.01427248 | 0.25792141  | -0.51567939 |
|    |   | Y | -0.12738121 | -0.08560291 | -0.09282440 | -0.21981184 | 0.00991093  |
|    |   | Z | -0.00101730 | 0.00918862  | -0.01866491 | 0.06101831  | 0.00144714  |

|                |       |             |             |             |             |             |
|----------------|-------|-------------|-------------|-------------|-------------|-------------|
| TRANS. SAYVETZ | X     | -0.00018017 | -0.00010754 | 0.00002832  | -0.00000000 | -0.00000000 |
|                | Y     | 0.00107390  | -0.00011522 | -0.00037950 | -0.00000000 | 0.00000000  |
|                | Z     | -0.00000000 | -0.00000000 | 0.00000000  | 0.00025344  | -0.00017965 |
|                | TOTAL | 0.00108891  | 0.00015761  | 0.00038056  | 0.00025344  | 0.00017965  |

|              |   |             |             |             |            |             |
|--------------|---|-------------|-------------|-------------|------------|-------------|
| ROT. SAYVETZ | X | -0.00000000 | -0.00000000 | -0.00000000 | 0.00195792 | 0.00044172  |
|              | Y | 0.00000000  | -0.00000000 | 0.00000000  | 0.00175095 | 0.00095334  |
|              | Z | 0.00701863  | -0.00119835 | -0.00257767 | 0.00000000 | -0.00000000 |

TOTAL 0.00701863 0.00119835 0.00257767 0.00262664 0.00105070

|               | 21      | 22      | 23      | 24      | 25      |
|---------------|---------|---------|---------|---------|---------|
| FREQUENCY:    | 1315.45 | 1329.11 | 1369.80 | 1428.74 | 1462.63 |
| SYMMETRY:     | A'      | A''     | A'      | A'      | A'      |
| REDUCED MASS: | 1.24149 | 1.07678 | 1.33003 | 1.20248 | 1.07029 |

|    |   |   |             |             |             |             |             |
|----|---|---|-------------|-------------|-------------|-------------|-------------|
| 1  | H | X | 0.13863511  | 0.00000000  | 0.08303256  | 0.38109377  | -0.02907057 |
|    |   | Y | -0.07117180 | 0.00000000  | -0.02032027 | -0.37589594 | 0.02992875  |
|    |   | Z | -0.00000000 | 0.05792230  | 0.00000000  | 0.00000000  | -0.00000000 |
| 2  | C | X | 0.00869270  | 0.00000000  | 0.02466872  | -0.11540422 | 0.00404948  |
|    |   | Y | 0.04017523  | 0.00000000  | 0.03256116  | 0.03454300  | 0.00249720  |
|    |   | Z | 0.00000000  | -0.04795063 | -0.00000000 | -0.00000000 | -0.00000000 |
| 3  | C | X | -0.05721978 | -0.00000000 | -0.12681628 | 0.00360023  | 0.00540897  |
|    |   | Y | -0.03060137 | -0.00000000 | -0.00820516 | -0.00373660 | 0.01063516  |
|    |   | Z | 0.00000000  | -0.02844024 | 0.00000000  | -0.00000000 | 0.00000000  |
| 4  | C | X | -0.08091475 | -0.00000000 | 0.05967386  | 0.00977614  | 0.01507477  |
|    |   | Y | -0.05886828 | -0.00000000 | 0.01405904  | 0.00764208  | -0.06651680 |
|    |   | Z | -0.00000000 | 0.04610374  | 0.00000000  | 0.00000000  | 0.00000000  |
| 5  | N | X | 0.00326005  | 0.00000000  | 0.00138687  | -0.00154766 | -0.00166670 |
|    |   | Y | 0.02661523  | 0.00000000  | -0.00951102 | -0.00459534 | -0.01403250 |
|    |   | Z | 0.00000000  | 0.02219102  | -0.00000000 | 0.00000000  | -0.00000000 |
| 6  | N | X | -0.01718591 | -0.00000000 | 0.01642477  | 0.00237997  | 0.01426527  |
|    |   | Y | 0.00298471  | 0.00000000  | -0.00530956 | 0.00011925  | -0.00370694 |
|    |   | Z | -0.00000000 | -0.00289422 | 0.00000000  | -0.00000000 | 0.00000000  |
| 7  | H | X | -0.01822813 | -0.10688147 | -0.05152484 | 0.48884612  | -0.02290741 |
|    |   | Y | -0.05522596 | 0.07336811  | -0.07422169 | -0.01388041 | -0.02584272 |
|    |   | Z | -0.05326858 | 0.02247317  | -0.05416301 | -0.14815044 | -0.01378880 |
| 8  | H | X | -0.01822813 | 0.10688147  | -0.05152484 | 0.48884612  | -0.02290741 |
|    |   | Y | -0.05522596 | -0.07336811 | -0.07422169 | -0.01388041 | -0.02584272 |
|    |   | Z | 0.05326858  | 0.02247317  | 0.05416301  | 0.14815044  | 0.01378880  |
| 9  | H | X | 0.31400774  | 0.51886224  | 0.47020610  | -0.02277433 | 0.00494606  |
|    |   | Y | 0.05967570  | 0.21154825  | 0.05602016  | -0.01307948 | -0.06052429 |
|    |   | Z | -0.00752836 | 0.01528048  | -0.06580783 | 0.00018236  | -0.04605112 |
| 10 | H | X | 0.31400774  | -0.51886224 | 0.47020610  | -0.02277433 | 0.00494606  |
|    |   | Y | 0.05967570  | -0.21154825 | 0.05602016  | -0.01307948 | -0.06052429 |
|    |   | Z | 0.00752836  | 0.01528048  | 0.06580783  | -0.00018236 | 0.04605112  |
| 11 | H | X | 0.50221532  | -0.33448178 | -0.33103928 | -0.05488133 | -0.20097198 |
|    |   | Y | 0.11905013  | -0.12643955 | -0.09729179 | 0.01729889  | 0.51254237  |
|    |   | Z | 0.08543573  | -0.02054678 | -0.05081656 | 0.00825706  | 0.39165608  |
| 12 | H | X | 0.50221532  | 0.33448178  | -0.33103928 | -0.05488133 | -0.20097198 |
|    |   | Y | 0.11905013  | 0.12643955  | -0.09729179 | 0.01729889  | 0.51254237  |
|    |   | Z | -0.08543573 | -0.02054678 | 0.05081656  | -0.00825706 | -0.39165608 |

|                |   |             |             |            |             |            |
|----------------|---|-------------|-------------|------------|-------------|------------|
| TRANS. SAYVETZ | X | -0.00010818 | -0.00000000 | 0.00007108 | 0.00021263  | 0.00022625 |
|                | Y | 0.00016089  | -0.00000000 | 0.00017360 | 0.00039215  | 0.00016347 |
|                | Z | -0.00000000 | -0.00017250 | 0.00000000 | -0.00000000 | 0.00000000 |
| TOTAL          |   | 0.00019388  | 0.00017250  | 0.00018759 | 0.00044609  | 0.00027913 |

|              |   |             |             |             |             |            |
|--------------|---|-------------|-------------|-------------|-------------|------------|
| ROT. SAYVETZ | X | -0.00000000 | -0.00096814 | 0.00000000  | -0.00000000 | 0.00000000 |
|              | Y | -0.00000000 | 0.00099070  | -0.00000000 | -0.00000000 | 0.00000000 |
|              | Z | 0.00058037  | -0.00000000 | 0.00112042  | 0.00366102  | 0.00005286 |
| TOTAL        |   | 0.00058037  | 0.00138520  | 0.00112042  | 0.00366102  | 0.00005286 |

|               | 26      | 27      | 28      | 29       | 30      |
|---------------|---------|---------|---------|----------|---------|
| FREQUENCY:    | 1499.25 | 1506.84 | 1514.20 | 2367.13  | 3052.25 |
| SYMMETRY:     | A'      | A''     | A'      | A'       | A'      |
| REDUCED MASS: | 1.04137 | 1.03572 | 1.09298 | 13.49355 | 1.03681 |

|   |   |   |            |            |            |            |            |
|---|---|---|------------|------------|------------|------------|------------|
| 1 | H | X | 0.20325596 | 0.00000000 | 0.15886265 | 0.00000845 | 0.27552605 |
|---|---|---|------------|------------|------------|------------|------------|

|                |               |       |             |             |             |             |             |
|----------------|---------------|-------|-------------|-------------|-------------|-------------|-------------|
|                |               | Y     | -0.19498998 | -0.00000000 | -0.15617834 | 0.00027794  | 0.33960754  |
|                |               | Z     | -0.00000000 | 0.68012236  | -0.00000000 | 0.00000000  | 0.00000000  |
| 2              | C             | X     | -0.00268413 | 0.00000000  | -0.00248558 | 0.00001664  | -0.04076636 |
|                |               | Y     | -0.03734732 | -0.00000000 | -0.02835430 | -0.00059499 | 0.02856224  |
|                |               | Z     | 0.00000000  | -0.04456558 | 0.00000000  | -0.00000000 | -0.00000000 |
| 3              | C             | X     | -0.02012472 | -0.00000000 | -0.01188496 | -0.00467265 | 0.00311338  |
|                |               | Y     | 0.03164720  | -0.00000000 | -0.07658168 | -0.00089755 | -0.00741418 |
|                |               | Z     | 0.00000000  | -0.02141003 | 0.00000000  | 0.00000000  | 0.00000000  |
| 4              | C             | X     | -0.00743812 | -0.00000000 | 0.01377937  | -0.00161363 | 0.00039112  |
|                |               | Y     | 0.00810737  | 0.00000000  | -0.00741412 | 0.00511684  | 0.00076076  |
|                |               | Z     | -0.00000000 | -0.00024433 | 0.00000000  | 0.00000000  | -0.00000000 |
| 5              | N             | X     | 0.00026413  | 0.00000000  | -0.00135678 | 0.17868210  | -0.00020055 |
|                |               | Y     | 0.00058262  | -0.00000000 | -0.00315245 | -0.07438888 | -0.00012126 |
|                |               | Z     | 0.00000000  | 0.00216533  | -0.00000000 | 0.00000000  | -0.00000000 |
| 6              | N             | X     | -0.00027050 | 0.00000000  | 0.00323227  | -0.16955693 | 0.00006992  |
|                |               | Y     | 0.00003603  | -0.00000000 | -0.00054261 | 0.07035222  | 0.00000704  |
|                |               | Z     | -0.00000000 | -0.00041107 | 0.00000000  | -0.00000000 | 0.00000000  |
| 7              | H             | X     | -0.03831548 | 0.43488793  | -0.03726391 | 0.00121733  | 0.09760801  |
|                |               | Y     | 0.40677981  | 0.23680362  | 0.30758988  | 0.00010813  | -0.33735812 |
|                |               | Z     | 0.30046073  | 0.04684494  | 0.22927481  | 0.00034081  | 0.50643672  |
| 8              | H             | X     | -0.03831548 | -0.43488793 | -0.03726391 | 0.00121733  | 0.09760801  |
|                |               | Y     | 0.40677981  | -0.23680362 | 0.30758988  | 0.00010813  | -0.33735812 |
|                |               | Z     | -0.30046073 | 0.04684494  | -0.22927481 | -0.00034081 | -0.50643672 |
| 9              | H             | X     | 0.08722930  | -0.04160297 | 0.00236210  | 0.00539121  | -0.01112582 |
|                |               | Y     | -0.32839642 | 0.02354279  | 0.41161142  | 0.00175539  | 0.04042072  |
|                |               | Z     | -0.25571909 | -0.00031234 | 0.32156309  | 0.00020202  | -0.06132889 |
| 10             | H             | X     | 0.08722930  | 0.04160297  | 0.00236210  | 0.00539121  | -0.01112582 |
|                |               | Y     | -0.32839642 | -0.02354279 | 0.41161142  | 0.00175539  | 0.04042072  |
|                |               | Z     | 0.25571909  | -0.00031234 | -0.32156309 | -0.00020202 | 0.06132889  |
| 11             | H             | X     | 0.02952865  | -0.02279738 | -0.05395987 | -0.03267567 | -0.00152318 |
|                |               | Y     | 0.00020491  | -0.00497331 | 0.05335104  | 0.00445908  | -0.00248937 |
|                |               | Z     | -0.00861565 | -0.00447463 | 0.04418685  | 0.01809538  | 0.00317446  |
| 12             | H             | X     | 0.02952865  | 0.02279738  | -0.05395987 | -0.03267567 | -0.00152318 |
|                |               | Y     | 0.00020491  | 0.00497331  | 0.05335104  | 0.00445908  | -0.00248937 |
|                |               | Z     | 0.00861565  | -0.00447463 | -0.04418685 | -0.01809538 | -0.00317446 |
| TRANS. SAYVETZ |               | X     | -0.00009388 | -0.00000000 | 0.00016031  | 0.00001096  | -0.00004197 |
|                |               | Y     | -0.00055936 | -0.00000000 | -0.00014867 | -0.00000978 | 0.00003179  |
|                |               | Z     | -0.00000000 | 0.00014423  | -0.00000000 | 0.00000000  | 0.00000000  |
|                |               | TOTAL | 0.00056719  | 0.00014423  | 0.00021864  | 0.00001469  | 0.00005265  |
| ROT. SAYVETZ   |               | X     | 0.00000000  | 0.00035514  | 0.00000000  | -0.00000000 | 0.00000000  |
|                |               | Y     | 0.00000000  | -0.00039232 | 0.00000000  | -0.00000000 | -0.00000000 |
|                |               | Z     | -0.00252229 | -0.00000000 | -0.00170109 | 0.00025030  | 0.00027094  |
|                |               | TOTAL | 0.00252229  | 0.00052919  | 0.00170109  | 0.00025030  | 0.00027094  |
|                |               |       | 31          | 32          | 33          | 34          | 35          |
|                | FREQUENCY:    |       | 3072.22     | 3089.88     | 3117.08     | 3136.46     | 3149.33     |
|                | SYMMETRY:     |       | A'          | A'          | A''         | A''         | A'          |
|                | REDUCED MASS: |       | 1.05894     | 1.05575     | 1.10623     | 1.10602     | 1.10156     |
| 1              | H             | X     | 0.06315336  | -0.01434731 | 0.00000000  | 0.00000000  | 0.54998121  |
|                |               | Y     | 0.07917409  | -0.01679123 | 0.00000000  | 0.00000000  | 0.64407526  |
|                |               | Z     | -0.00000000 | 0.00000000  | 0.01485890  | -0.01620605 | -0.00000000 |
| 2              | C             | X     | -0.00597674 | 0.00117805  | -0.00000000 | -0.00000000 | -0.03699511 |
|                |               | Y     | -0.00229371 | 0.00116135  | -0.00000000 | -0.00000000 | -0.07968000 |
|                |               | Z     | -0.00000000 | 0.00000000  | 0.05589167  | -0.06874515 | -0.00000000 |
| 3              | C             | X     | -0.01672587 | 0.00424198  | 0.00000000  | 0.00000000  | 0.00078680  |
|                |               | Y     | 0.06217594  | -0.01222366 | -0.00000000 | -0.00000000 | -0.00471008 |
|                |               | Z     | -0.00000000 | 0.00000000  | -0.06884220 | -0.05341478 | 0.00000000  |

|    |   |   |             |             |             |             |             |
|----|---|---|-------------|-------------|-------------|-------------|-------------|
| 4  | C | X | -0.00009895 | 0.00357677  | 0.00000000  | 0.00000000  | 0.00066748  |
|    |   | Y | -0.01423602 | -0.06257071 | -0.00000000 | -0.00000000 | 0.00000442  |
|    |   | Z | -0.00000000 | -0.00000000 | 0.01515846  | 0.02231893  | -0.00000000 |
| 5  | N | X | 0.00114376  | 0.00400610  | 0.00000000  | 0.00000000  | 0.00004579  |
|    |   | Y | 0.00017002  | -0.00133799 | -0.00000000 | -0.00000000 | 0.00019753  |
|    |   | Z | 0.00000000  | -0.00000000 | -0.00010632 | 0.00003023  | 0.00000000  |
| 6  | N | X | -0.00040161 | -0.00283720 | -0.00000000 | -0.00000000 | 0.00005508  |
|    |   | Y | 0.00003870  | 0.00085912  | 0.00000000  | 0.00000000  | -0.00010666 |
|    |   | Z | -0.00000000 | 0.00000000  | 0.00005887  | 0.00006022  | -0.00000000 |
| 7  | H | X | 0.00748627  | -0.00209348 | -0.06833932 | 0.08710447  | -0.05671478 |
|    |   | Y | -0.02813234 | 0.00309003  | 0.23909024  | -0.29245423 | 0.15325195  |
|    |   | Z | 0.03880306  | -0.00418866 | -0.34110370 | 0.41722596  | -0.25041853 |
| 8  | H | X | 0.00748627  | -0.00209348 | 0.06833932  | -0.08710447 | -0.05671478 |
|    |   | Y | -0.02813234 | 0.00309003  | -0.23909024 | 0.29245423  | 0.15325195  |
|    |   | Z | -0.03880306 | 0.00418866  | -0.34110370 | 0.41722596  | 0.25041853  |
| 9  | H | X | 0.09939287  | -0.01936259 | 0.07831344  | 0.06594629  | -0.00816308 |
|    |   | Y | -0.36139801 | 0.07951145  | -0.28705373 | -0.22186115 | 0.02477239  |
|    |   | Z | 0.54920618  | -0.11679934 | 0.41131622  | 0.31810200  | -0.03572605 |
| 10 | H | X | 0.09939287  | -0.01936259 | -0.07831344 | -0.06594629 | -0.00816308 |
|    |   | Y | -0.36139801 | 0.07951145  | 0.28705373  | 0.22186115  | 0.02477239  |
|    |   | Z | -0.54920618 | 0.11679934  | 0.41131622  | 0.31810200  | 0.03572605  |
| 11 | H | X | -0.00785897 | -0.03301764 | -0.00652729 | -0.01045198 | 0.00076919  |
|    |   | Y | 0.07673429  | 0.36750123  | 0.06081734  | 0.08953479  | 0.00159180  |
|    |   | Z | -0.12012485 | -0.56104709 | -0.09047424 | -0.13349061 | -0.00229734 |
| 12 | H | X | -0.00785897 | -0.03301764 | 0.00652729  | 0.01045198  | 0.00076919  |
|    |   | Y | 0.07673429  | 0.36750123  | -0.06081734 | -0.08953479 | 0.00159180  |
|    |   | Z | 0.12012485  | 0.56104709  | -0.09047424 | -0.13349061 | 0.00229734  |

|                |   |             |            |             |             |             |
|----------------|---|-------------|------------|-------------|-------------|-------------|
| TRANS. SAYVETZ | X | 0.00001110  | 0.00007031 | 0.00000000  | -0.00000000 | -0.00001334 |
|                | Y | -0.00001651 | 0.00002508 | -0.00000000 | -0.00000000 | -0.00019708 |
|                | Z | -0.00000000 | 0.00000000 | -0.00003456 | -0.00006470 | 0.00000000  |
| TOTAL          |   | 0.00001989  | 0.00007465 | 0.00003456  | 0.00006470  | 0.00019753  |

|              |   |             |             |             |             |             |
|--------------|---|-------------|-------------|-------------|-------------|-------------|
| ROT. SAYVETZ | X | -0.00000000 | 0.00000000  | -0.00002325 | -0.00006582 | -0.00000000 |
|              | Y | 0.00000000  | 0.00000000  | 0.00003342  | 0.00031176  | -0.00000000 |
|              | Z | -0.00000888 | -0.00007507 | -0.00000000 | -0.00000000 | -0.00115697 |
| TOTAL        |   | 0.00000888  | 0.00007507  | 0.00004071  | 0.00031863  | 0.00115697  |

36

FREQUENCY: 3162.74

SYMMETRY: A''

REDUCED MASS: 1.11137

|   |   |   |             |
|---|---|---|-------------|
| 1 | H | X | -0.00000000 |
|   |   | Y | -0.00000000 |
|   |   | Z | -0.00033195 |
| 2 | C | X | 0.00000000  |
|   |   | Y | 0.00000000  |
|   |   | Z | -0.00758486 |
| 3 | C | X | 0.00000000  |
|   |   | Y | -0.00000000 |
|   |   | Z | -0.02543348 |
| 4 | C | X | -0.00000000 |
|   |   | Y | 0.00000000  |
|   |   | Z | -0.08815248 |
| 5 | N | X | -0.00000000 |
|   |   | Y | 0.00000000  |
|   |   | Z | 0.00049944  |
| 6 | N | X | 0.00000000  |
|   |   | Y | 0.00000000  |

|    |   |   |             |
|----|---|---|-------------|
|    |   | Z | -0.00047100 |
| 7  | H | X | 0.01180968  |
|    |   | Y | -0.03307728 |
|    |   | Z | 0.04668197  |
| 8  | H | X | -0.01180968 |
|    |   | Y | 0.03307728  |
|    |   | Z | 0.04668197  |
| 9  | H | X | 0.02652553  |
|    |   | Y | -0.10626089 |
|    |   | Z | 0.15031009  |
| 10 | H | X | -0.02652553 |
|    |   | Y | 0.10626089  |
|    |   | Z | 0.15031009  |
| 11 | H | X | 0.02530825  |
|    |   | Y | -0.36338272 |
|    |   | Z | 0.52437531  |
| 12 | H | X | -0.02530825 |
|    |   | Y | 0.36338272  |
|    |   | Z | 0.52437531  |

|                |   |            |
|----------------|---|------------|
| TRANS. SAYVETZ | X | 0.00000000 |
|                | Y | 0.00000000 |
|                | Z | 0.00003809 |
| TOTAL          |   | 0.00003809 |

|              |   |             |
|--------------|---|-------------|
| ROT. SAYVETZ | X | -0.00013054 |
|              | Y | 0.00026981  |
|              | Z | 0.00000000  |
| TOTAL        |   | 0.00029973  |

REFERENCE ON SAYVETZ CONDITIONS - A. SAYVETZ, J.CHEM.PHYS., 7, 383-389(1939).

NOTE - THE MODES J,K ARE ORTHONORMALIZED ACCORDING TO  

$$\text{SUM ON I } M(I) * (X(I,J)*X(I,K) + Y(I,J)*Y(I,K) + Z(I,J)*Z(I,K)) = \text{DELTA}(J,K)$$



Vibrational Analysis, PDI Gauche Conformer, CCSD(T)/cc-pVTZ

-----  
 NORMAL COORDINATE ANALYSIS IN THE HARMONIC APPROXIMATION  
 -----

ATOMIC WEIGHTS (AMU)

|    |   |          |
|----|---|----------|
| 1  | H | 1.00782  |
| 2  | C | 12.00000 |
| 3  | C | 12.00000 |
| 4  | C | 12.00000 |
| 5  | N | 14.00307 |
| 6  | N | 14.00307 |
| 7  | H | 1.00782  |
| 8  | H | 1.00782  |
| 9  | H | 1.00782  |
| 10 | H | 1.00782  |
| 11 | H | 1.00782  |
| 12 | H | 1.00782  |

MODES 1 TO 6 ARE TAKEN AS ROTATIONS AND TRANSLATIONS.

ANALYZING SYMMETRY OF NORMAL MODES...

FREQUENCIES IN CM\*\*<sup>-1</sup>, IR INTENSITIES IN DEBYE\*\*<sup>2</sup>/AMU-ANGSTROM\*\*<sup>2</sup>,  
 REDUCED MASSES IN AMU.

|   |               |   | 1           | 2           | 3           | 4           | 5           |
|---|---------------|---|-------------|-------------|-------------|-------------|-------------|
|   | FREQUENCY:    |   | 9.44        | 7.78        | 2.62        | 3.42        | 8.18        |
|   | SYMMETRY:     |   | A           | A           | A           | A           | A           |
|   | REDUCED MASS: |   | 3.25590     | 4.22515     | 5.78733     | 8.46353     | 4.34120     |
|   |               |   |             |             |             |             |             |
| 1 | H             | X | 0.03392277  | 0.01754462  | -0.12752324 | -0.00429544 | 0.15491497  |
|   |               | Y | -0.05988480 | 0.03793821  | -0.12825045 | -0.02630855 | -0.00600405 |
|   |               | Z | 0.18239115  | 0.15494465  | -0.05078809 | -0.06147125 | 0.03688848  |
| 2 | C             | X | -0.02154427 | 0.00024771  | -0.07317874 | 0.02008513  | 0.14099087  |
|   |               | Y | -0.06076017 | 0.05766805  | -0.10391458 | -0.03820961 | -0.00272264 |
|   |               | Z | 0.13958439  | 0.10203306  | -0.05524831 | -0.01836709 | 0.01920097  |
| 3 | C             | X | 0.03956304  | 0.05086995  | -0.06273734 | 0.02997295  | 0.11178557  |
|   |               | Y | -0.07143641 | 0.06668659  | -0.03901795 | 0.02634243  | -0.06330418 |
|   |               | Z | -0.00763193 | -0.00907692 | -0.03982998 | -0.00187463 | 0.04960959  |
| 4 | C             | X | -0.03973872 | 0.02415871  | 0.01026079  | 0.06245043  | 0.09541513  |
|   |               | Y | -0.07388721 | 0.09709626  | 0.00208530  | 0.01244671  | -0.06163690 |
|   |               | Z | -0.08026452 | -0.09057053 | -0.04391883 | 0.05509844  | 0.03058615  |
| 5 | N             | X | -0.02562069 | 0.06192667  | 0.07049109  | 0.09475283  | 0.05166976  |
|   |               | Y | -0.06835553 | 0.07481082  | -0.04676039 | -0.00141001 | -0.04119514 |
|   |               | Z | 0.01042941  | -0.05873521 | -0.06922140 | 0.11176341  | -0.03671245 |
| 6 | N             | X | -0.01254994 | 0.09107010  | 0.11340335  | 0.11779168  | 0.01934414  |
|   |               | Y | -0.06424156 | 0.05721600  | -0.08436375 | -0.01113981 | -0.02609271 |
|   |               | Z | 0.07950508  | -0.03318299 | -0.08773468 | 0.15201532  | -0.08624169 |
| 7 | H             | X | -0.13600303 | -0.08293901 | -0.06682810 | 0.01510803  | 0.17923456  |
|   |               | Y | -0.05778154 | 0.08872721  | -0.08890594 | -0.08733233 | 0.02947279  |
|   |               | Z | 0.13288188  | 0.10172228  | -0.05248393 | -0.02643354 | 0.02668229  |
| 8 | H             | X | -0.00672159 | 0.02854884  | -0.03494456 | 0.04112524  | 0.11133289  |
|   |               | Y | -0.05658983 | 0.03868596  | -0.14478460 | -0.04944035 | 0.01425386  |
|   |               | Z | 0.21688550  | 0.13567826  | -0.07407588 | 0.01884862  | -0.02840330 |
| 9 | H             | X | 0.15427046  | 0.13400273  | -0.06956071 | 0.03466748  | 0.07354451  |
|   |               | Y | -0.07415137 | 0.03594297  | -0.05337807 | 0.07581919  | -0.09634007 |
|   |               | Z | -0.00281192 | -0.00989477 | -0.04228948 | 0.00576190  | 0.04290322  |

|    |   |   |             |             |             |             |             |
|----|---|---|-------------|-------------|-------------|-------------|-------------|
| 10 | H | X | 0.02671916  | 0.02335132  | -0.10234732 | 0.00828329  | 0.14140677  |
|    |   | Y | -0.07581531 | 0.08487447  | 0.00079115  | 0.03790435  | -0.07991957 |
|    |   | Z | -0.08323256 | -0.04073816 | -0.02078799 | -0.03984974 | 0.09763477  |
| 11 | H | X | 0.00425502  | 0.06205038  | 0.02086790  | 0.07108030  | 0.07188565  |
|    |   | Y | -0.08186164 | 0.10263226  | 0.04728283  | 0.05834094  | -0.10502551 |
|    |   | Z | -0.18254889 | -0.16958890 | -0.03406035 | 0.06980624  | 0.05037521  |
| 12 | H | X | -0.15534424 | -0.05741565 | 0.02214417  | 0.06048678  | 0.13190414  |
|    |   | Y | -0.07099523 | 0.12862379  | 0.01721341  | -0.03708126 | -0.02822487 |
|    |   | Z | -0.08688741 | -0.09352122 | -0.04234081 | 0.05209723  | 0.03467644  |

|                |   |             |             |             |             |             |
|----------------|---|-------------|-------------|-------------|-------------|-------------|
| TRANS. SAYVETZ | X | -0.87466429 | 3.17186335  | 0.70622842  | 4.55460555  | 6.04369753  |
|                | Y | -4.81058467 | 5.02766533  | -3.87907793 | -0.19709948 | -2.74811540 |
|                | Z | 2.05767458  | -1.17929254 | -4.18513810 | 4.13089899  | -0.26617740 |
| TOTAL          |   | 5.30478908  | 6.06043453  | 5.74990305  | 6.15204083  | 6.64449159  |

|              |   |             |             |             |              |              |
|--------------|---|-------------|-------------|-------------|--------------|--------------|
| ROT. SAYVETZ | X | 1.80480898  | 8.59410614  | 2.92590566  | -13.41792435 | 9.10276096   |
|              | Y | 10.45510697 | 7.45218919  | -1.26575402 | -0.35816920  | -2.78954548  |
|              | Z | -2.34272494 | 6.46730361  | 18.27249120 | 9.37058712   | -10.71259429 |
| TOTAL        |   | 10.86530982 | 13.08509839 | 18.54850376 | 16.36999945  | 14.33183511  |

|               |  |         |         |         |         |         |
|---------------|--|---------|---------|---------|---------|---------|
|               |  | 6       | 7       | 8       | 9       | 10      |
| FREQUENCY:    |  | 10.76   | 105.42  | 171.07  | 255.56  | 323.01  |
| SYMMETRY:     |  | A       | A       | A       | A       | A       |
| REDUCED MASS: |  | 3.77852 | 2.49088 | 2.14496 | 1.40184 | 4.62445 |

|    |   |   |             |             |             |             |             |
|----|---|---|-------------|-------------|-------------|-------------|-------------|
| 1  | H | X | -0.09457317 | 0.02537100  | -0.15923669 | -0.22109983 | 0.08154034  |
|    |   | Y | -0.04739412 | 0.06674510  | -0.23700076 | -0.26246516 | 0.10758888  |
|    |   | Z | 0.15465867  | 0.09663369  | 0.18141321  | 0.35294316  | 0.09967881  |
| 2  | C | X | -0.05547928 | 0.03638825  | 0.00219342  | -0.00821019 | -0.05919340 |
|    |   | Y | -0.01561319 | 0.13827433  | -0.06951292 | -0.00572693 | 0.08779133  |
|    |   | Z | 0.12320576  | -0.03646496 | -0.01977892 | 0.01613321  | 0.02124408  |
| 3  | C | X | -0.06795564 | -0.03856720 | -0.02212654 | 0.04494423  | -0.05202566 |
|    |   | Y | -0.01121012 | -0.02538910 | -0.06985312 | 0.06358304  | -0.03169972 |
|    |   | Z | 0.15467722  | 0.03445411  | 0.03614491  | -0.06593553 | -0.05414378 |
| 4  | C | X | -0.01414842 | -0.06758254 | 0.03821395  | 0.00064725  | 0.03122671  |
|    |   | Y | 0.03733861  | 0.00285793  | 0.00742759  | -0.01185615 | -0.03365609 |
|    |   | Z | 0.11830008  | -0.04407788 | -0.05376905 | 0.03323468  | -0.00273315 |
| 5  | N | X | 0.00772859  | -0.00954771 | 0.04319620  | -0.03228879 | 0.14418032  |
|    |   | Y | 0.00515287  | -0.03510105 | 0.01896524  | 0.00400818  | -0.09285705 |
|    |   | Z | 0.02679002  | -0.00394421 | -0.03998278 | 0.07162398  | 0.06961700  |
| 6  | N | X | 0.02260913  | 0.07879655  | -0.05406374 | -0.00485618 | -0.06590889 |
|    |   | Y | -0.02047904 | -0.09266845 | 0.12012742  | -0.04483483 | 0.04823752  |
|    |   | Z | -0.04007736 | 0.05424463  | 0.07629804  | -0.05693999 | -0.04449625 |
| 7  | H | X | -0.02085254 | 0.15903385  | 0.10859352  | -0.01372569 | -0.11948069 |
|    |   | Y | 0.03887371  | 0.33642027  | 0.22201143  | 0.40528695  | 0.14129661  |
|    |   | Z | 0.13397602  | 0.00311884  | 0.03370699  | 0.08280701  | 0.02707453  |
| 8  | H | X | -0.04294685 | -0.01343432 | 0.06671466  | 0.14929192  | -0.12937419 |
|    |   | Y | -0.04295967 | 0.13100067  | -0.20226806 | -0.23263814 | 0.16104837  |
|    |   | Z | 0.05813391  | -0.26544492 | -0.31699944 | -0.29874069 | 0.04143097  |
| 9  | H | X | -0.10288906 | -0.12936877 | -0.08876919 | 0.12667885  | -0.03569070 |
|    |   | Y | -0.06538460 | -0.13580668 | -0.19906892 | 0.17411885  | -0.02176494 |
|    |   | Z | 0.14495014  | 0.01437536  | 0.01454046  | -0.04597481 | -0.05099886 |
| 10 | H | X | -0.08148198 | 0.03093158  | -0.04491590 | 0.02568142  | -0.03361166 |
|    |   | Y | 0.01487771  | -0.05713645 | -0.02092616 | 0.05218353  | -0.04525427 |
|    |   | Z | 0.22015500  | 0.18012913  | 0.17818291  | -0.20300548 | -0.05028764 |
| 11 | H | X | -0.02210121 | -0.03071913 | 0.05834430  | -0.01728814 | 0.07343969  |
|    |   | Y | 0.03915177  | 0.01346637  | 0.01605993  | -0.01252091 | 0.12512680  |
|    |   | Z | 0.13708002  | -0.11610441 | -0.09255452 | 0.07174448  | 0.01761025  |
| 12 | H | X | 0.02379455  | -0.14215967 | 0.00269707  | 0.01996882  | 0.02422385  |
|    |   | Y | 0.09265986  | 0.03174032  | 0.05902455  | -0.10347577 | -0.11535152 |

|        |               |       |             |             |             |             |             |
|--------|---------------|-------|-------------|-------------|-------------|-------------|-------------|
|        |               | Z     | 0.12375015  | -0.04669715 | -0.05243117 | 0.02804858  | -0.00902126 |
| TRANS. | SAYVETZ       | X     | -1.56989787 | 0.03142780  | 0.01017612  | -0.00151680 | -0.00390847 |
|        |               | Y     | -0.05837181 | -0.01079390 | -0.00053916 | 0.00095076  | -0.00013459 |
|        |               | Z     | 5.54844832  | 0.01625766  | 0.00512312  | -0.00546382 | 0.00025103  |
|        |               | TOTAL | 5.76656443  | 0.03699360  | 0.01140573  | 0.00574960  | 0.00391883  |
| ROT.   | SAYVETZ       | X     | 13.79062993 | 0.04282982  | 0.04395761  | -0.01574250 | 0.00221828  |
|        |               | Y     | -3.11542077 | 0.02838210  | -0.00218746 | -0.01719492 | 0.00155874  |
|        |               | Z     | 8.53590655  | -0.07958805 | 0.03887007  | 0.00675049  | 0.02039624  |
|        |               | TOTAL | 16.51511492 | 0.09473223  | 0.05871915  | 0.02427057  | 0.02057565  |
|        |               |       | 11          | 12          | 13          | 14          | 15          |
|        | FREQUENCY:    |       | 356.88      | 508.77      | 613.61      | 784.30      | 858.96      |
|        | SYMMETRY:     |       | A           | A           | A           | A           | A           |
|        | REDUCED MASS: |       | 2.38908     | 4.16583     | 3.63558     | 1.31969     | 2.21397     |
| 1      | H             | X     | -0.02555817 | 0.11778439  | 0.03492220  | -0.20916699 | -0.14638580 |
|        |               | Y     | -0.02151327 | 0.02660599  | 0.00864798  | -0.08225152 | 0.03029778  |
|        |               | Z     | -0.14585820 | 0.07549250  | 0.03224060  | 0.01645961  | -0.04176908 |
| 2      | C             | X     | 0.04545941  | -0.02239300 | -0.01411809 | 0.02268550  | -0.10642845 |
|        |               | Y     | -0.04986754 | 0.00329907  | 0.00379729  | 0.02421060  | 0.04192634  |
|        |               | Z     | -0.02921965 | 0.00577730  | 0.00120709  | -0.00445242 | -0.04193583 |
| 3      | C             | X     | 0.01929272  | -0.01645803 | 0.00564745  | 0.02983154  | 0.04490003  |
|        |               | Y     | 0.00535169  | -0.09594295 | -0.00715297 | 0.09603769  | 0.06150903  |
|        |               | Z     | 0.05370558  | -0.05044282 | -0.02926303 | -0.02457551 | 0.06371057  |
| 4      | C             | X     | -0.05680909 | 0.00602776  | 0.15208328  | -0.06939701 | 0.11197427  |
|        |               | Y     | 0.03767132  | -0.09357754 | 0.12959961  | -0.04865453 | -0.10626709 |
|        |               | Z     | -0.05511067 | -0.01794831 | -0.06263076 | -0.01541226 | 0.01652599  |
| 5      | N             | X     | 0.02636100  | -0.04335852 | -0.07800715 | 0.03557097  | -0.01705012 |
|        |               | Y     | 0.01238956  | 0.14942905  | -0.02627794 | -0.02069935 | 0.00849452  |
|        |               | Z     | 0.14767447  | 0.07905076  | 0.05459067  | -0.00777940 | -0.01493203 |
| 6      | N             | X     | -0.02351860 | 0.08023705  | -0.04511561 | -0.00202045 | 0.00406457  |
|        |               | Y     | 0.00329240  | 0.03721158  | -0.07585972 | 0.01167545  | -0.00562342 |
|        |               | Z     | -0.08612671 | -0.04140725 | 0.00275820  | -0.00013156 | 0.00227023  |
| 7      | H             | X     | 0.12727645  | -0.08977122 | -0.09859575 | -0.25574219 | -0.14598385 |
|        |               | Y     | -0.14561211 | 0.04759668  | -0.00022501 | -0.09932633 | 0.03427387  |
|        |               | Z     | -0.04075853 | 0.00934013  | -0.00367533 | -0.03751514 | -0.04627080 |
| 8      | H             | X     | 0.05580629  | -0.09760964 | -0.00691941 | 0.30023748  | -0.07489469 |
|        |               | Y     | -0.05985858 | 0.08277245  | 0.01424655  | -0.19274479 | 0.01719667  |
|        |               | Z     | -0.02755615 | 0.03861262  | 0.07026954  | 0.22931860  | -0.00999682 |
| 9      | H             | X     | 0.00270910  | -0.09062231 | -0.10723104 | -0.31286943 | -0.06898418 |
|        |               | Y     | -0.04727934 | -0.22206124 | -0.23470903 | -0.21858223 | 0.08239285  |
|        |               | Z     | 0.04488160  | -0.06960190 | -0.06524230 | -0.08144983 | 0.06275223  |
| 10     | H             | X     | 0.01319903  | -0.02673190 | -0.05058064 | 0.22315321  | 0.01260353  |
|        |               | Y     | 0.01743180  | -0.06267007 | 0.10739056  | 0.00576400  | 0.09482778  |
|        |               | Z     | 0.09433389  | 0.11042546  | 0.26057024  | 0.41725291  | 0.10317662  |
| 11     | H             | X     | 0.08518878  | -0.02893153 | 0.06907786  | -0.10510668 | 0.21660225  |
|        |               | Y     | 0.08744093  | -0.07946310 | 0.05340616  | 0.00571032  | -0.30896168 |
|        |               | Z     | -0.33676857 | 0.07748671  | 0.05819718  | 0.10759727  | -0.34998984 |
| 12     | H             | X     | -0.39202381 | 0.09417212  | 0.16003508  | 0.09479401  | -0.21314278 |
|        |               | Y     | 0.02948610  | -0.16795858 | -0.03328638 | -0.14569860 | 0.04392013  |
|        |               | Z     | -0.07838581 | -0.01928966 | -0.06844430 | -0.01254167 | 0.00117600  |
| TRANS. | SAYVETZ       | X     | 0.00067257  | -0.00012913 | -0.00003110 | 0.00047881  | 0.00003924  |
|        |               | Y     | -0.00353803 | 0.00077115  | -0.00050420 | -0.00005595 | 0.00012357  |
|        |               | Z     | 0.00041392  | -0.00003453 | 0.00095707  | 0.00006288  | -0.00081522 |
|        |               | TOTAL | 0.00362510  | 0.00078265  | 0.00108220  | 0.00048615  | 0.00082547  |
| ROT.   | SAYVETZ       | X     | 0.00843660  | 0.00313348  | 0.00321896  | 0.00179067  | -0.00078759 |

|       |             |             |             |             |            |
|-------|-------------|-------------|-------------|-------------|------------|
| Y     | 0.00353180  | -0.00133730 | 0.00004285  | -0.00086034 | 0.00083042 |
| Z     | -0.00305771 | -0.00297800 | -0.00119999 | -0.00188028 | 0.00001582 |
| TOTAL | 0.00964362  | 0.00452499  | 0.00343562  | 0.00273534  | 0.00114462 |

|               |         |         |         |         |         |
|---------------|---------|---------|---------|---------|---------|
|               | 16      | 17      | 18      | 19      | 20      |
| FREQUENCY:    | 895.06  | 1033.56 | 1117.54 | 1158.70 | 1275.16 |
| SYMMETRY:     | A       | A       | A       | A       | A       |
| REDUCED MASS: | 1.39111 | 1.72364 | 2.06264 | 1.75834 | 1.16946 |

|    |   |   |             |             |             |             |             |
|----|---|---|-------------|-------------|-------------|-------------|-------------|
| 1  | H | X | -0.28710907 | 0.34978789  | 0.27405133  | 0.04788158  | -0.01882398 |
|    |   | Y | 0.10009417  | -0.00434134 | 0.00883057  | -0.10525822 | 0.07580930  |
|    |   | Z | -0.28172606 | 0.11305366  | 0.08192682  | 0.17471207  | -0.10906717 |
| 2  | C | X | -0.05273577 | 0.07883065  | -0.08213592 | 0.02900975  | -0.01859579 |
|    |   | Y | 0.03276457  | -0.07714502 | -0.06914704 | 0.01002760  | -0.00709944 |
|    |   | Z | 0.04600530  | 0.03097256  | -0.06422361 | -0.07755888 | 0.06014651  |
| 3  | C | X | 0.00454831  | -0.07634185 | 0.14023710  | -0.03632826 | 0.01818756  |
|    |   | Y | 0.04894290  | 0.11782003  | 0.02302874  | -0.01337135 | -0.00136391 |
|    |   | Z | 0.06205237  | -0.00323343 | 0.03565902  | 0.12567953  | -0.06091952 |
| 4  | C | X | 0.00342529  | 0.00675870  | -0.08068065 | 0.00634800  | -0.01319197 |
|    |   | Y | -0.04768901 | -0.05983432 | 0.04066187  | -0.01004450 | 0.00606021  |
|    |   | Z | -0.09971323 | -0.03305959 | 0.00326744  | -0.11174802 | -0.02798345 |
| 5  | N | X | 0.00799450  | 0.00670702  | 0.02540708  | 0.00507367  | 0.02382356  |
|    |   | Y | -0.00213403 | -0.00883333 | -0.01874934 | 0.00295505  | -0.01056474 |
|    |   | Z | 0.02024331  | -0.00692043 | 0.00177395  | 0.03944908  | 0.04718840  |
| 6  | N | X | -0.00065183 | -0.00247753 | -0.00374360 | -0.00164026 | -0.00535614 |
|    |   | Y | -0.00135432 | -0.00229986 | 0.00503749  | -0.00311253 | -0.00051811 |
|    |   | Z | -0.00511409 | 0.00106104  | 0.00004069  | -0.00682877 | -0.00667886 |
| 7  | H | X | 0.35552045  | 0.13363953  | -0.11677546 | -0.31533741 | 0.17431105  |
|    |   | Y | -0.13733032 | 0.11006214  | 0.20385308  | 0.07384078  | -0.04856267 |
|    |   | Z | 0.03835866  | 0.06742397  | -0.02493164 | -0.08153889 | 0.06074199  |
| 8  | H | X | -0.04925755 | -0.12207858 | -0.34324189 | 0.10107126  | -0.05001684 |
|    |   | Y | -0.02790233 | 0.11858358  | 0.18355918  | 0.00097193  | -0.02282733 |
|    |   | Z | -0.20409498 | -0.00020580 | -0.06942711 | 0.20109401  | -0.14448799 |
| 9  | H | X | 0.28834428  | -0.21760596 | 0.14740218  | -0.01708898 | -0.30633262 |
|    |   | Y | -0.11245334 | 0.06979129  | -0.16591220 | 0.30758414  | 0.10199662  |
|    |   | Z | 0.05368309  | -0.01704087 | 0.01198358  | 0.17283070  | -0.06702472 |
| 10 | H | X | -0.06057943 | -0.33992710 | 0.07072614  | 0.00160844  | 0.09047670  |
|    |   | Y | 0.08932286  | 0.35813747  | 0.11232303  | -0.11122846 | -0.05143849 |
|    |   | Z | -0.01885491 | 0.07377636  | 0.16267847  | -0.20352866 | 0.01759965  |
| 11 | H | X | -0.11325573 | -0.00033338 | -0.16134929 | -0.13454689 | -0.18376176 |
|    |   | Y | -0.00408143 | -0.11545166 | -0.07051311 | -0.11290494 | -0.46640814 |
|    |   | Z | 0.19925587  | -0.04985609 | 0.10010115  | 0.12852455  | 0.00079393  |
| 12 | H | X | 0.29730174  | 0.02687075  | 0.09729486  | 0.28027840  | 0.19996652  |
|    |   | Y | -0.26393927 | -0.15398285 | -0.01687318 | 0.10902806  | 0.59424905  |
|    |   | Z | -0.09592199 | -0.04205025 | 0.01369360  | -0.08784659 | 0.02082046  |

|                |       |            |             |             |             |             |
|----------------|-------|------------|-------------|-------------|-------------|-------------|
| TRANS. SAYVETZ | X     | 0.00001098 | -0.00077840 | 0.00025988  | 0.00001587  | 0.00048031  |
|                | Y     | 0.00029614 | -0.00001653 | -0.00022031 | 0.00043680  | 0.00021742  |
|                | Z     | 0.00026816 | 0.00034136  | 0.00002965  | -0.00011605 | -0.00016979 |
|                | TOTAL | 0.00039966 | 0.00085012  | 0.00034199  | 0.00045223  | 0.00055389  |

|              |       |            |            |             |             |             |
|--------------|-------|------------|------------|-------------|-------------|-------------|
| ROT. SAYVETZ | X     | 0.00149842 | 0.00136426 | 0.00061457  | -0.00139203 | -0.00047820 |
|              | Y     | 0.00011038 | 0.00102765 | 0.00013663  | 0.00038013  | -0.00046894 |
|              | Z     | 0.00037505 | 0.00156465 | -0.00067279 | 0.00062485  | -0.00090736 |
|              | TOTAL | 0.00154858 | 0.00231633 | 0.00092141  | 0.00157248  | 0.00112778  |

|               |         |         |         |         |         |
|---------------|---------|---------|---------|---------|---------|
|               | 21      | 22      | 23      | 24      | 25      |
| FREQUENCY:    | 1292.78 | 1351.61 | 1383.77 | 1436.39 | 1461.69 |
| SYMMETRY:     | A       | A       | A       | A       | A       |
| REDUCED MASS: | 1.20738 | 1.19580 | 1.35113 | 1.23232 | 1.07512 |

|    |   |   |             |             |             |             |             |
|----|---|---|-------------|-------------|-------------|-------------|-------------|
| 1  | H | X | 0.11931344  | -0.09255335 | 0.12361399  | 0.39319328  | -0.07675837 |
|    |   | Y | 0.03686097  | -0.01071790 | -0.03537839 | 0.03501923  | -0.04119736 |
|    |   | Z | -0.04621194 | -0.03815426 | 0.08886891  | 0.34520528  | 0.00479278  |
| 2  | C | X | -0.02735027 | 0.01585526  | 0.00593762  | -0.10881532 | 0.02000122  |
|    |   | Y | -0.06347594 | 0.01431290  | -0.02092782 | 0.03959353  | -0.00195850 |
|    |   | Z | 0.02703292  | -0.00626379 | -0.03433395 | -0.04234124 | 0.00263883  |
| 3  | C | X | -0.01026487 | 0.05107003  | -0.10833949 | 0.02959776  | -0.00512041 |
|    |   | Y | 0.06003433  | -0.00651726 | 0.08784494  | -0.01029251 | 0.00358258  |
|    |   | Z | 0.01130187  | -0.00073805 | -0.01059560 | 0.00584560  | -0.00206020 |
| 4  | C | X | 0.03474150  | -0.00439593 | 0.02397143  | -0.01327865 | -0.05799089 |
|    |   | Y | -0.04187860 | -0.09968200 | -0.03009216 | -0.01124897 | 0.00090443  |
|    |   | Z | -0.04008850 | -0.01848947 | 0.01231317  | -0.00224856 | 0.03643724  |
| 5  | N | X | -0.02476523 | -0.01454844 | 0.00093435  | -0.00417245 | -0.01095545 |
|    |   | Y | 0.01322559  | 0.00362943  | 0.00122845  | 0.00212287  | 0.00524681  |
|    |   | Z | -0.00398382 | 0.00905058  | 0.01377242  | 0.00053022  | 0.00868460  |
| 6  | N | X | -0.00276326 | -0.01114981 | -0.00290729 | -0.00238463 | -0.00803121 |
|    |   | Y | -0.01159105 | -0.01695528 | -0.00471652 | -0.00345675 | -0.01323712 |
|    |   | Z | 0.00192339  | 0.00236088  | -0.00126319 | 0.00057494  | 0.00123878  |
| 7  | H | X | 0.12994650  | -0.12298915 | 0.07325732  | 0.47515459  | -0.05655308 |
|    |   | Y | 0.09972084  | 0.00485671  | 0.08372601  | -0.20097032 | -0.02690346 |
|    |   | Z | 0.06283939  | -0.02158167 | -0.00819566 | -0.03300375 | -0.00410029 |
| 8  | H | X | -0.20213686 | -0.00782107 | 0.05309696  | 0.30646996  | -0.07137943 |
|    |   | Y | 0.07963910  | 0.03034347  | -0.00883164 | -0.29174113 | 0.07220014  |
|    |   | Z | -0.08666760 | -0.01252555 | 0.16165454  | 0.16696051  | -0.02734655 |
| 9  | H | X | -0.24847546 | 0.03535144  | 0.51143376  | -0.08216838 | 0.02103996  |
|    |   | Y | 0.21661082  | -0.10254715 | -0.43493387 | 0.05051036  | -0.04742262 |
|    |   | Z | 0.02654885  | -0.01589190 | -0.05755916 | 0.01140078  | -0.00919147 |
| 10 | H | X | 0.49129129  | -0.28430443 | 0.21039951  | -0.04946371 | 0.00812682  |
|    |   | Y | -0.37189974 | 0.28647808  | -0.18995893 | 0.05826660  | -0.01699412 |
|    |   | Z | 0.04680946  | 0.01077638  | 0.00503376  | -0.00123527 | -0.02156682 |
| 11 | H | X | 0.13406932  | 0.09292721  | 0.00364067  | 0.05332518  | 0.28688065  |
|    |   | Y | 0.43787304  | 0.51350697  | -0.12163449 | 0.12360044  | 0.13911533  |
|    |   | Z | 0.08550276  | 0.19208602  | -0.00905535 | -0.04816264 | -0.59044022 |
| 12 | H | X | -0.00713417 | -0.00816904 | -0.01359876 | 0.09582413  | 0.66575941  |
|    |   | Y | 0.01775865  | 0.55671373  | 0.31703312  | 0.02891533  | 0.00201894  |
|    |   | Z | -0.03922705 | 0.03085697  | 0.03366378  | 0.00478337  | 0.06930003  |

|                |   |             |             |             |             |             |
|----------------|---|-------------|-------------|-------------|-------------|-------------|
| TRANS. SAYVETZ | X | 0.00016917  | -0.00009329 | 0.00057727  | -0.00010868 | 0.00000428  |
|                | Y | -0.00034836 | -0.00060007 | 0.00002609  | 0.00000988  | -0.00009731 |
|                | Z | 0.00008517  | 0.00060474  | -0.00014027 | -0.00001698 | 0.00006843  |
| TOTAL          |   | 0.00039652  | 0.00085703  | 0.00059464  | 0.00011044  | 0.00011904  |

|              |   |             |             |             |             |             |
|--------------|---|-------------|-------------|-------------|-------------|-------------|
| ROT. SAYVETZ | X | -0.00021762 | 0.00049092  | -0.00002347 | -0.00041546 | 0.00023231  |
|              | Y | -0.00016263 | -0.00015997 | -0.00052625 | -0.00042400 | -0.00029841 |
|              | Z | -0.00007285 | -0.00008954 | -0.00098477 | 0.00006517  | 0.00025660  |
| TOTAL        |   | 0.00028127  | 0.00052404  | 0.00111681  | 0.00059719  | 0.00045701  |

|               | 26      | 27      | 28      | 29       | 30      |
|---------------|---------|---------|---------|----------|---------|
| FREQUENCY:    | 1481.79 | 1503.87 | 1513.34 | 2368.52  | 3043.73 |
| SYMMETRY:     | A       | A       | A       | A        | A       |
| REDUCED MASS: | 1.06911 | 1.05918 | 1.03609 | 13.47250 | 1.03980 |

|   |   |   |             |             |             |             |             |
|---|---|---|-------------|-------------|-------------|-------------|-------------|
| 1 | H | X | 0.07284256  | -0.25814704 | -0.35014909 | -0.00269946 | 0.11597015  |
|   |   | Y | -0.01051786 | -0.01675310 | -0.36994155 | 0.00024490  | -0.31813477 |
|   |   | Z | 0.08090814  | -0.22407501 | 0.44674429  | -0.00072749 | -0.16275528 |
| 2 | C | X | 0.00647305  | -0.01284741 | 0.02536203  | -0.00003076 | -0.04632906 |
|   |   | Y | 0.00841756  | -0.03288561 | 0.02115200  | 0.00037060  | -0.00734493 |
|   |   | Z | 0.00560248  | -0.02812080 | -0.03032250 | 0.00007761  | -0.02275992 |
| 3 | C | X | -0.03941895 | 0.00680765  | 0.01069930  | 0.00025263  | 0.00651412  |

|    |   |   |             |             |             |             |             |
|----|---|---|-------------|-------------|-------------|-------------|-------------|
|    |   | Y | -0.03037821 | -0.03964223 | 0.00910117  | -0.00403810 | 0.00456565  |
|    |   | Z | -0.04817243 | -0.02642596 | -0.01508847 | -0.00084344 | 0.00397324  |
| 4  | C | X | -0.00606261 | -0.00712363 | 0.00553289  | -0.00452196 | -0.00024176 |
|    |   | Y | -0.01279259 | 0.00155913  | 0.00188083  | 0.00012134  | -0.00001132 |
|    |   | Z | -0.00833580 | 0.00147184  | -0.00213278 | 0.00271432  | -0.00025769 |
| 5  | N | X | 0.00065694  | 0.00027755  | 0.00179837  | 0.11798105  | -0.00018828 |
|    |   | Y | -0.00073511 | -0.00045526 | -0.00171781 | 0.15009949  | -0.00014004 |
|    |   | Z | 0.00125671  | 0.00098302  | -0.00022970 | -0.03138518 | 0.00001276  |
| 6  | N | X | 0.00008557  | 0.00037853  | 0.00059039  | -0.11193120 | 0.00014398  |
|    |   | Y | 0.00072641  | 0.00073271  | 0.00066473  | -0.14253241 | 0.00011666  |
|    |   | Z | -0.00021938 | -0.00009695 | -0.00012987 | 0.02963436  | -0.00003104 |
| 7  | H | X | -0.09042280 | 0.34195363  | 0.27135233  | -0.00013370 | -0.04650837 |
|    |   | Y | -0.16369433 | 0.51391946  | -0.36049848 | -0.00010735 | -0.09268354 |
|    |   | Z | -0.02968575 | 0.08952521  | -0.05843894 | -0.00036052 | 0.55402111  |
| 8  | H | X | -0.01113232 | 0.03486340  | -0.33798780 | 0.00117285  | 0.46630575  |
|    |   | Y | -0.02007685 | 0.08330817  | 0.38056080  | 0.00053740  | 0.50398710  |
|    |   | Z | -0.16463420 | 0.58814473  | 0.15416520  | 0.00061894  | -0.12615477 |
| 9  | H | X | 0.42185905  | 0.04475958  | -0.05740230 | 0.00080799  | 0.00273040  |
|    |   | Y | 0.50256918  | 0.19542417  | -0.00010336 | 0.00651602  | 0.01032970  |
|    |   | Z | 0.06887272  | 0.01249589  | -0.02285737 | -0.00015590 | -0.05680263 |
| 10 | H | X | 0.04020562  | -0.05436850 | 0.03765102  | -0.00313128 | -0.06276058 |
|    |   | Y | 0.05961709  | 0.05862831  | -0.00735193 | -0.01093831 | -0.07193867 |
|    |   | Z | 0.64134560  | 0.17533937  | 0.00334060  | 0.00011547  | 0.01579964  |
| 11 | H | X | -0.00705440 | 0.00370179  | -0.03108084 | -0.00532096 | 0.00304834  |
|    |   | Y | 0.00017511  | -0.00134514 | -0.02664885 | -0.03288542 | 0.00066739  |
|    |   | Z | -0.00161789 | -0.02575678 | 0.05343230  | 0.01641396  | 0.00275350  |
| 12 | H | X | 0.02776541  | 0.03474576  | -0.06076837 | -0.02354134 | -0.00121641 |
|    |   | Y | 0.04561328  | 0.00794878  | 0.01594594  | -0.02624652 | 0.00129888  |
|    |   | Z | -0.00338260 | 0.00408108  | -0.00524589 | -0.01478402 | 0.00020839  |

|                |       |             |             |             |             |             |
|----------------|-------|-------------|-------------|-------------|-------------|-------------|
| TRANS. SAYVETZ | X     | -0.00008850 | -0.00011069 | 0.00006073  | 0.00001252  | 0.00000556  |
|                | Y     | -0.00023810 | -0.00002691 | -0.00005581 | 0.00003715  | -0.00002616 |
|                | Z     | 0.00009377  | 0.00011264  | 0.00004919  | -0.00000582 | 0.00005846  |
|                | TOTAL | 0.00027077  | 0.00016020  | 0.00009603  | 0.00003963  | 0.00006428  |

|              |       |            |             |             |            |             |
|--------------|-------|------------|-------------|-------------|------------|-------------|
| ROT. SAYVETZ | X     | 0.00046721 | 0.00040251  | 0.00028812  | 0.00004571 | 0.00009087  |
|              | Y     | 0.00048375 | 0.00038317  | -0.00062472 | 0.00000457 | -0.00000565 |
|              | Z     | 0.00019427 | -0.00024875 | 0.00020823  | 0.00009791 | -0.00015250 |
|              | TOTAL | 0.00070003 | 0.00060886  | 0.00071878  | 0.00010815 | 0.00017762  |

|               | 31      | 32      | 33      | 34      | 35      |
|---------------|---------|---------|---------|---------|---------|
| FREQUENCY:    | 3065.92 | 3089.06 | 3106.09 | 3125.01 | 3148.07 |
| SYMMETRY:     | A       | A       | A       | A       | A       |
| REDUCED MASS: | 1.06124 | 1.05876 | 1.10042 | 1.10289 | 1.10033 |

|   |   |   |             |             |             |             |             |
|---|---|---|-------------|-------------|-------------|-------------|-------------|
| 1 | H | X | 0.02935600  | 0.00373749  | -0.03841268 | 0.06636618  | -0.28846006 |
|   |   | Y | -0.07998018 | -0.00486090 | 0.06518520  | -0.14101041 | 0.71839437  |
|   |   | Z | -0.04318863 | -0.00423457 | 0.04961123  | -0.08645336 | 0.36043484  |
| 2 | C | X | -0.00434487 | 0.00259001  | -0.02362514 | 0.02311492  | 0.01800253  |
|   |   | Y | 0.00430183  | 0.00447208  | -0.03742941 | 0.04527451  | -0.06256855 |
|   |   | Z | -0.00095159 | -0.00528123 | 0.04275624  | -0.03676598 | -0.05784879 |
| 3 | C | X | -0.03957679 | -0.00598867 | 0.02189097  | 0.02419853  | 0.00052054  |
|   |   | Y | -0.04028923 | -0.00606965 | 0.02907983  | 0.03115301  | 0.00064918  |
|   |   | Z | -0.03639304 | 0.01510211  | -0.04852987 | -0.04739249 | -0.00747649 |
| 4 | C | X | 0.00270938  | 0.04802220  | 0.01322651  | 0.00888372  | 0.00119756  |
|   |   | Y | -0.00269473 | -0.01252425 | -0.00259604 | -0.00170386 | -0.00014242 |
|   |   | Z | 0.00265701  | -0.03902647 | -0.00240815 | 0.00457931  | 0.00214124  |
| 5 | N | X | 0.00089434  | 0.00250025  | 0.00016407  | 0.00006364  | -0.00008631 |
|   |   | Y | 0.00178615  | 0.00379418  | -0.00013051 | -0.00056770 | 0.00002670  |
|   |   | Z | -0.00001924 | -0.00049538 | -0.00016771 | -0.00020288 | -0.00002771 |

|    |   |   |             |             |             |             |             |
|----|---|---|-------------|-------------|-------------|-------------|-------------|
| 6  | N | X | -0.00034997 | -0.00164725 | -0.00018882 | -0.00018671 | 0.00004407  |
|    |   | Y | -0.00062499 | -0.00249231 | -0.00030014 | -0.00013575 | 0.00004078  |
|    |   | Z | 0.00003658  | 0.00029487  | 0.00008458  | 0.00008073  | -0.00001519 |
| 7  | H | X | -0.00494762 | -0.00297509 | 0.03259569  | -0.02590796 | -0.02510174 |
|    |   | Y | -0.00935633 | -0.00911544 | 0.06888430  | -0.06260112 | -0.07191820 |
|    |   | Z | 0.06846452  | 0.06080461  | -0.48851684 | 0.44982266  | 0.36931280  |
| 8  | H | X | 0.03649630  | -0.03447934 | 0.29020338  | -0.31761656 | 0.10399070  |
|    |   | Y | 0.03870863  | -0.03804164 | 0.31323945  | -0.33532994 | 0.09693707  |
|    |   | Z | -0.00819835 | 0.00804907  | -0.06887228 | 0.07565833  | -0.03814602 |
| 9  | H | X | -0.03795303 | 0.00589446  | -0.02764386 | -0.02169094 | -0.00214085 |
|    |   | Y | -0.09310120 | 0.02540460  | -0.07492546 | -0.07449428 | -0.01321967 |
|    |   | Z | 0.55528951  | -0.16051222 | 0.52801058  | 0.50682504  | 0.08433469  |
| 10 | H | X | 0.50208294  | 0.05420039  | -0.23946508 | -0.26746761 | -0.00078066 |
|    |   | Y | 0.57502836  | 0.05944217  | -0.27655529 | -0.30069400 | -0.00146976 |
|    |   | Z | -0.13097133 | -0.01087593 | 0.04990116  | 0.05526874  | -0.00014866 |
| 11 | H | X | -0.04312860 | -0.53615518 | -0.14997544 | -0.10065689 | -0.02182876 |
|    |   | Y | 0.01086376  | 0.17177359  | 0.04708980  | 0.03076061  | 0.00711117  |
|    |   | Z | -0.02278844 | -0.25864503 | -0.07147869 | -0.04581340 | -0.00918748 |
| 12 | H | X | 0.00126244  | -0.03342837 | -0.00381230 | -0.00047575 | 0.00003839  |
|    |   | Y | 0.00220643  | -0.05456137 | -0.00661464 | 0.00348957  | 0.00213986  |
|    |   | Z | -0.00584343 | 0.71595271  | 0.10000093  | -0.00603856 | -0.01371528 |

|                |   |             |             |             |             |             |
|----------------|---|-------------|-------------|-------------|-------------|-------------|
| TRANS. SAYVETZ | X | 0.00002456  | -0.00002920 | -0.00001702 | -0.00002965 | -0.00006008 |
|                | Y | -0.00007902 | -0.00001653 | -0.00000806 | 0.00006883  | -0.00004714 |
|                | Z | -0.00001483 | 0.00000679  | 0.00008260  | 0.00003720  | -0.00003287 |
| TOTAL          |   | 0.00008406  | 0.00003423  | 0.00008472  | 0.00008367  | 0.00008314  |

|              |   |             |             |             |            |             |
|--------------|---|-------------|-------------|-------------|------------|-------------|
| ROT. SAYVETZ | X | -0.00030712 | 0.00010553  | -0.00006305 | 0.00006504 | -0.00019065 |
|              | Y | -0.00005787 | -0.00007808 | 0.00007354  | 0.00000978 | -0.00004244 |
|              | Z | -0.00026624 | -0.00002113 | -0.00013445 | 0.00014975 | 0.00002232  |
| TOTAL        |   | 0.00041056  | 0.00013296  | 0.00016571  | 0.00016356 | 0.00019659  |

36

FREQUENCY: 3162.17  
 SYMMETRY: A  
 REDUCED MASS: 1.11142

|   |   |   |             |
|---|---|---|-------------|
| 1 | H | X | -0.00364525 |
|   |   | Y | 0.00887234  |
|   |   | Z | 0.00464982  |
| 2 | C | X | 0.00135560  |
|   |   | Y | 0.00003388  |
|   |   | Z | -0.00209766 |
| 3 | C | X | 0.00202153  |
|   |   | Y | 0.00307748  |
|   |   | Z | -0.01025821 |
| 4 | C | X | -0.04776953 |
|   |   | Y | 0.02032778  |
|   |   | Z | -0.07522491 |
| 5 | N | X | 0.00012280  |
|   |   | Y | -0.00032566 |
|   |   | Z | 0.00035950  |
| 6 | N | X | -0.00017396 |
|   |   | Y | 0.00020287  |
|   |   | Z | -0.00039959 |
| 7 | H | X | 0.00031653  |
|   |   | Y | -0.00431709 |
|   |   | Z | 0.02209966  |
| 8 | H | X | -0.00735294 |
|   |   | Y | -0.00792789 |

|    |   |   |             |
|----|---|---|-------------|
|    |   | Z | 0.00128965  |
| 9  | H | X | -0.00732744 |
|    |   | Y | -0.01418305 |
|    |   | Z | 0.11373342  |
| 10 | H | X | -0.01990598 |
|    |   | Y | -0.02278980 |
|    |   | Z | 0.00398227  |
| 11 | H | X | 0.60857537  |
|    |   | Y | -0.20040396 |
|    |   | Z | 0.27558548  |
| 12 | H | X | -0.04138985 |
|    |   | Y | -0.03665221 |
|    |   | Z | 0.62199757  |

|                |   |             |
|----------------|---|-------------|
| TRANS. SAYVETZ | X | -0.00001328 |
|                | Y | -0.00002203 |
|                | Z | -0.00002892 |
| TOTAL          |   | 0.00003871  |

|              |   |             |
|--------------|---|-------------|
| ROT. SAYVETZ | X | -0.00002963 |
|              | Y | 0.00000130  |
|              | Z | 0.00010879  |
| TOTAL        |   | 0.00011276  |

REFERENCE ON SAYVETZ CONDITIONS - A. SAYVETZ, J.CHEM.PHYS., 7, 383-389(1939).

NOTE - THE MODES J,K ARE ORTHONORMALIZED ACCORDING TO  

$$\text{SUM ON I } M(I) * (X(I,J)*X(I,K) + Y(I,J)*Y(I,K) + Z(I,J)*Z(I,K)) = \text{DELTA}(J,K)$$
